1

2 Small molecule modulation of a redox-sensitive stress granule protein  
3 dissolves stress granules with beneficial outcomes for familial amyotrophic  
4 lateral sclerosis models

5

6

|    |                                               |                                                |
|----|-----------------------------------------------|------------------------------------------------|
| 7  | Hiroyuki Uechi <sup>1</sup>                   | (uechi@mpi-cbg.de)                             |
| 8  | Sindhuja Sridharan <sup>2,24</sup>            | (sindhuja.sridharan@embl.de)                   |
| 9  | Jik Nijssen <sup>1</sup>                      | (nijssen@mpi-cbg.de)                           |
| 10 | Jessica Bilstein <sup>1,25</sup>              | (jessica.bellmann@uniklinikum-dresden.de)      |
| 11 | Juan M. Iglesias-Artola <sup>1</sup>          | (jiglesia@mpi-cbg.de)                          |
| 12 | Satoshi Kishigami <sup>3</sup>                | (satoshi.kishigami@exeter.ox.ac.uk)            |
| 13 | Virginia Casablancas-Antras <sup>3</sup>      | (virginia.casablancasantras@st-annes.ox.ac.uk) |
| 14 | Ina Poser <sup>4</sup>                        | (iposer@dewpointx.com)                         |
| 15 | Eduardo J. Martinez <sup>5</sup>              | (emartinez@dewpointx.com)                      |
| 16 | Edgar Boczek <sup>4</sup>                     | (eboczek@dewpointtherapeutics.com)             |
| 17 | Michael Wagner <sup>4</sup>                   | (mwagner@dewpointx.com)                        |
| 18 | Nadine Tomschke <sup>1</sup>                  | (tomschke@mpi-cbg.de)                          |
| 19 | António M. de Jesus Domingues <sup>1,26</sup> | (amjdomingues@gmail.com)                       |
| 20 | Arun Pal <sup>6,27</sup>                      | (a.pal@hzdr.de)                                |
| 21 | Thom Doeleman <sup>6</sup>                    | (T.Doeleman-3@umcutrecht.nl)                   |
| 22 | Sukhleen Kour <sup>7,8,9</sup>                | (suk106@pitt.edu)                              |
| 23 | Eric Nathaniel Anderson <sup>7,8,9</sup>      | (ena15@pitt.edu)                               |
| 24 | Frank Stein <sup>10</sup>                     | (frank.stein@embl.de)                          |
| 25 | Hyun O. Lee <sup>1,28</sup>                   | (hyunokate.lee@utoronto.ca)                    |
| 26 | Xiaojie Zhang <sup>1,29</sup>                 | (zhangxj2@shanghaitech.edu.cn)                 |
| 27 | Anatol W. Fritsch <sup>1</sup>                | (fritsch@mpi-cbg.de)                           |
| 28 | Marcus Jahnel <sup>1,11,12</sup>              | (marcus.jahnel@tu-dresden.de)                  |
| 29 | Julius Fürsch <sup>13,14</sup>                | (juliusfuersch@gmail.com)                      |
| 30 | Anastasia C. Murthy <sup>15</sup>             | (anastasia_murthy@alumni.brown.edu)            |
| 31 | Simon Alberti <sup>12</sup>                   | (simon.alberti@tu-dresden.de)                  |
| 32 | Marc Bickle <sup>1,30</sup>                   | (marc.bickle@roche.com)                        |
| 33 | Nicolas L. Fawzi <sup>16</sup>                | (nicolas_fawzi@brown.edu)                      |
| 34 | André Nadler <sup>1</sup>                     | (nadler@mpi-cbg.de)                            |
| 35 | Della C. David <sup>17,31</sup>               | (della.david@babraham.ac.uk)                   |

36 Udai B. Pandey<sup>7,8,9</sup> (udai@pitt.edu)  
37 Andreas Hermann<sup>6,18,19,20,21</sup> (Andreas.Hermann@med.uni-rostock.de)  
38 Florian Stengel<sup>13,14</sup> (florian.stengel@uni-konstanz.de)  
39 Benjamin G. Davis<sup>3,22</sup> (ben.davis@chem.ox.ac.uk)  
40 Andrew J. Baldwin<sup>3,22</sup> (andrew.baldwin@chem.ox.ac.uk)  
41 Mikhail M. Savitski<sup>2</sup> (mikhail.savitski@embl.de)  
42 Anthony A. Hyman<sup>1</sup> (hyman@mpi-cbg.de)  
43 Richard J. Wheeler<sup>1,23</sup> (richard.wheeler@ndm.ox.ac.uk)

44

## 45 Affiliations

46 <sup>1</sup>Max Planck Institute of Molecular Cell Biology and Genetics, Pfotenhauerstraße 108, 01307  
47 Dresden, Germany

48 <sup>2</sup>Genome Biology Unit, European Molecular Biology Laboratory, Meyerhofstraße 1, 69117  
49 Heidelberg, Germany

50 <sup>3</sup>Department of Chemistry, University of Oxford, South Parks Road, Oxford OX1 3TA, UK

51 <sup>4</sup>Dewpoint Therapeutics GmbH, Tatzberg 47, Dresden, Germany

52 <sup>5</sup>Dewpoint Therapeutics Inc, 451 D Street, Suite 104, Boston, MA 02210, USA

53 <sup>6</sup>Department of Neurology, Technische Universität Dresden, Dresden, Germany

54 <sup>7</sup>Division of Child Neurology, Department of Pediatrics, Children's Hospital of Pittsburgh, University of  
55 Pittsburgh Medical Center, Pittsburgh, PA, USA

56 <sup>8</sup>Department of Human Genetics, University of Pittsburgh Graduate School of Public Health,  
57 Pittsburgh, PA, USA

58 <sup>9</sup>Department of Neurology, University of Pittsburgh School of Medicine, Pittsburgh, PA, USA

59 <sup>10</sup>Proteomics Core Facility, European Molecular Biology Laboratory (EMBL), Heidelberg, Germany

60 <sup>11</sup>Cluster of Excellence Physics of Life, TU Dresden, 01062 Dresden, Germany

61 <sup>12</sup>Biotechnology Center (BIOTEC), CMCB, TU Dresden, Tatzberg 47/48, 01307 Dresden, Germany

62 <sup>13</sup>University of Konstanz, Department of Biology, Universitätsstrasse 10, 78457 Konstanz, Germany

63 <sup>14</sup>Konstanz Research School Chemical Biology, University of Konstanz, Universitätsstrasse 10, 78457  
64 Konstanz, Germany

65 <sup>15</sup>Graduate Program in Molecular Biology, Cell Biology and Biochemistry, Brown University,  
66 Providence, RI, USA

67 <sup>16</sup>Department of Molecular Biology, Cell Biology, and Biochemistry, Brown University, Providence, RI,  
68 USA

69 <sup>17</sup>German Centre for Neurodegenerative Diseases, Otfried-Müller-Straße 23, 72076 Tübingen,  
70 Germany

71 <sup>18</sup>Center for Regenerative Therapies TU Dresden (CRTD), Technische Universität Dresden, Dresden,  
72 Germany

73 <sup>19</sup>Center for Transdisciplinary Neurosciences Rostock (CTNR), University Medical Center Rostock,  
74 University of Rostock, 18147 Rostock, Germany

75 <sup>20</sup>Translational Neurodegeneration Section “Albrecht Kossel”, Department of Neurology, University  
76 Medical Center Rostock, 18147 Rostock, Germany

77 <sup>21</sup>Deutsches Zentrum für Neurodegenerative (DZNE) Rostock/Greifswald, 18147 Rostock, Germany

78 <sup>22</sup>The Rosalind Franklin Institute, Oxfordshire, OX11 0FA, UK

79 <sup>23</sup>Peter Medawar Building for Pathogen Research, Nuffield Department of Medicine, University of  
80 Oxford, Oxford OX1 3SY, UK

81

## 82 Present address

83 <sup>24</sup>Present address: Blizard Institute, Barts and the London School of Medicine and Dentistry, Queen  
84 Mary University of London, London, UK

85 <sup>25</sup>Present address: Faculty of Medicine, University Hospital Carl Gustav Carus, Technische Universität  
86 Dresden, Dresden, Germany.

87 <sup>26</sup>Present address: Dewpoint Therapeutics GmbH, Tatzberg 47, Dresden, Germany

88 <sup>27</sup>Present address: Dresden High Magnetic Field Laboratory (HLD), Helmholtz-Zentrum Dresden-  
89 Rossendorf (HZDR), 01328 Dresden, Germany

90 <sup>28</sup>Present address: Department of Biochemistry, University of Toronto, Toronto, ON M5G 1M1 Canada

91 <sup>29</sup>Present address: iHuman Institute, School of Life Science and Technology, ShanghaiTech University,  
92 Shanghai, China

93 <sup>30</sup>Present address: Institute for Translational Bioengineering, pRED, Roche, Grenzachertrasse 124,  
94 4070, Basel, Switzerland

95 <sup>31</sup>Present address: Babraham Institute, Cambridge CB22 3AT, UK

96

## 97 Abstract

98 Neurodegenerative diseases such as amyotrophic lateral sclerosis (ALS) are often associated with  
99 mutations in proteins that are associated with stress granules. Stress granules are condensates formed  
100 by liquid-liquid phase separation which, when aberrant, can lead to altered condensation behaviours  
101 and disease phenotypes. Here, we identified lipoamide, a small molecule which specifically prevents  
102 cytoplasmic condensation of stress granule proteins. Thermal proteome profiling showed that  
103 lipoamide preferentially stabilises intrinsically disordered domain-containing proteins. These include  
104 SRSF1 and SFPQ, stress granule proteins necessary for lipoamide activity. The redox state of SFPQ  
105 correlates with its condensate-dissolving behaviour, in concordance with the importance of the  
106 dithiolane ring for lipoamide activity. In animals, lipoamide ameliorates aging-associated aggregation  
107 of a stress granule reporter, improves neuronal morphology, and recovers motor defects caused by  
108 expression of ALS-associated FUS and TDP-43 mutants. In conclusion, lipoamide is a well-tolerated  
109 small molecule modulator of stress granule condensation and dissection of its molecular mechanism  
110 identified a cellular pathway for redox regulation of stress granule formation.

## 111 Introduction

112 Amyotrophic lateral sclerosis (ALS) is a fatal neurodegenerative disease, primarily affecting motor  
113 neurons, with poor prognosis and few options for therapy<sup>1</sup>. Currently three FDA approved drugs are  
114 available: riluzole, edaravone, and, recently approved, relyvrio™ (a combination of sodium  
115 phenylbutyrate and taurursodiol)<sup>2-4</sup>. However, none blocks disease progression, and thus investigating  
116 new therapeutic routes is important to overcome ALS. Many mutations associated with familial ALS  
117 are found in RNA-binding proteins. Notably, TAR DNA-binding protein 43 (TDP-43) and fused in  
118 sarcoma (FUS), with >40 ALS-associated mutations described in each<sup>5-7</sup>. These RNA-binding proteins  
119 have large intrinsically disordered regions (IDRs) with low sequence complexity.

120 TDP-43 and FUS are examples of stress granule proteins which normally localise to the nucleus, where  
121 they have crucial functions in gene expression regulation and DNA damage responses. For example,  
122 FUS localises to paraspeckles and DNA damage foci in the nucleus<sup>8,9</sup>. Upon cellular stress, TDP-43 and  
123 FUS are exported to the cytoplasm where they become incorporated into stress granules, although  
124 neither are necessary for stress granule formation<sup>10</sup>. Stress granules are liquid-like cytoplasmic  
125 assemblies, or condensates, which are formed by liquid-liquid phase separation of both nuclear  
126 exported and constitutively cytoplasmic proteins, along with mRNA<sup>11-13</sup>. Stress granule formation is  
127 triggered by cellular stresses, such as oxidative stress. This is often dependent on the cytoplasmic  
128 stress granule protein G3BP1<sup>10</sup>. When the cellular stress is alleviated, stress granules dissolve and  
129 proteins that normally reside in the nucleus, including FUS and TDP-43 translocate back to the nucleus.

130 It has been proposed that ALS-linked FUS and TDP-43 mutants cause diseases in part by inducing  
131 aberrant phase transition of stress granules<sup>12,14,15</sup>. This reduces the dynamics of stress granule proteins,  
132 preventing them from dissolving when stress is removed, thus trapping nuclear proteins in the  
133 cytoplasm. Supportive evidence is that FUS and TDP-43 mutants often show constitutive  
134 mislocalisation to the cytoplasm, and FUS tends to aggregate more readily in the cytoplasm<sup>16</sup>. Both  
135 mechanisms may cause a loss-of-function phenotype in the nucleus or a gain-of-function (cytotoxic)  
136 phenotype in the cytoplasm as cytoplasmic aggregates or fibrils: these are associated with motor  
137 neuron dysfunction leading to neurodegenerative disease<sup>17-19</sup>. Either way, dissolving aberrant stress  
138 granules, reducing sensitivity to triggers of stress granule formation, preventing or reversing stress  
139 granule protein aggregation, and/or driving protein back to the nucleus might be an efficient way to  
140 prevent or reverse the consequences of ALS.

141 Small molecules have been an essential tool for relating cytology to function. For instance, the  
142 microtubule polymerization inhibitor nocodazole have helped us to study cytokinesis and microtubule-  
143 mediated intracellular trafficking. Inhibitors against actin/myosin II activities such as cytochalasin and  
144 Y-27632 have illuminated pivotal roles of these cytoskeletal proteins in cell shape, division, and  
145 migration. Indeed compounds have been identified that can disrupt stress granule condensation,  
146 especially 1,6-hexanediol<sup>20</sup> and similar alcohols<sup>21</sup>. However, these compounds are both toxic and non-  
147 specific, as they affect multiple condensates<sup>21,22</sup>. There is an unmet need for non-toxic and specific  
148 compounds able to specifically dissolve condensates. Here we searched for compounds that both  
149 prevented the formation of stress granules, and induced their dissolution, and identify lipoamide,  
150 which partitions into stress granules in cells and alleviates pathology caused by ALS-associated FUS  
151 and TDP-43 mutants in both motor neurons *in vitro* and in fly models of ALS. Using lipoamide as a tool  
152 compound, we identify a pathway that allows stress granules to sense the oxidative state of the cell.

## 153 Results

154 We performed a cell-based screen of 1,600 small molecules to identify compounds which affect stress  
155 granule formation upon arsenate treatment, by monitoring GFP-tagged FUS (FUS-GFP) localisation in  
156 HeLa cells (Fig. 1A–C). Many compounds altered FUS-GFP localisation in stressed cells, often reducing  
157 the number of FUS-GFP-containing stress granules (Fig. 1B,C). Emetine, known to prevent stress  
158 granule formation by stabilising polysomes<sup>23</sup>, was present in the library and acted as a positive control.  
159 Edaravone, an FDA-approved ALS therapeutic<sup>24</sup>, had no significant effect.

160 The 47 strongest hits in HeLa cells were further tested *in vitro* for an effect on condensation of purified  
161 FUS-GFP under physiological (low salt, 50 mM KCl and reducing, 1 mM DTT) conditions, with the aim  
162 of selecting for compounds which can directly affect stress granule proteins (Fig. S1A). Seven  
163 compounds significantly affected FUS-GFP condensates *in vitro* and fell into three compound classes  
164 (Fig. S1B,C). Of these, surfactants have no plausibility as a systemic therapeutic, and heterotri- and  
165 tetracyclic compounds have previously been investigated for anti-prion properties with limited  
166 success<sup>25</sup>. Lipoamide was a novel hit for stress granule modulation. Lipoic acid, a related compound  
167 featuring a carboxylic acid instead of the carboxamide, was also a good hit in HeLa cells (Fig. 1B).

### 168 Lipoamide prevents and reverses stress granule formation in cultured cells

169 To test whether lipoamide and lipoic acid affect stress granule formation or solely partitioning of FUS  
170 into stress granules, we treated HeLa cells expressing five different GFP-tagged stress granule proteins  
171 with lipoamide or lipoic acid. Pre-treatment with either compound for 1 h prior to 1 h arsenate stress  
172 prevented cytoplasmic condensation for all proteins we tested, including G3BP1 (Fig. 1D). Addition of  
173 lipoamide and lipoic acid to arsenate-stressed cells, in continued presence of arsenate, also led to  
174 dissolution of pre-existing stress granules (Fig. S1D).

175 To assess whether lipoamide acts specifically on stress granules, we tested its effects on other  
176 intracellular condensates such as P-bodies, Cajal bodies, and DNA damage foci and found that these  
177 nuclear or cytoplasmic condensates were not affected (Fig. S1E). The specificity extended to stressor  
178 types, as stress granule formation induced by oxidative stress and osmotic shock was inhibited  
179 whereas stress granules still formed after heat treatment or inhibition of glycolysis (Fig. S1F). Therefore,  
180 we conclude that the lipoamide activity is comparatively specific with regard to modulating the  
181 properties of a cellular condensate.

182 To confirm that lipoamide enters cells and to determine its intracellular concentration, we synthesised  
183 [15N]-lipoamide, which can be quantitatively detected by <sup>15</sup>N NMR (Fig. S2). Upon treatment of HeLa  
184 cells with 100 μM [15N]-lipoamide, loss of [15N]-lipoamide signal from the growth medium indicated

185 that it accumulates in millimolar concentrations in cells. There was also a corresponding gain in [15N]-  
186 lipoamide signal in the cell pellet (Fig. S2A–C). These indicate that lipoamide is taken into cells.

187 We used two strategies to ask whether lipoamide partitions into stress granules. Firstly, we used [15N]-  
188 lipoamide with FUS condensates, as a minimal *in vitro* model of the stress granule environment. [15N]-  
189 lipoamide from the dilute phase following FUS-GFP condensation under low salt reducing conditions  
190 (Fig. S3A–D) partitioned into the FUS-GFP condensate phase by a factor of ten (Fig. 2A). To analyse  
191 partitioning of lipoamide into stress granules in cells, we synthesized a lipoamide analogue derivatised  
192 with a diazirine (for UV-induced crosslinking) and alkyne (for click chemistry) groups (Fig. 2B). This  
193 dissolved stress granules with a slightly lower potency than lipoamide (Fig S3E), but allowed us to  
194 crosslink this analogue to proteins in the vicinity by UV irradiation, subsequently labelling it *via* click  
195 reaction with a fluorophore. Using the click-crosslink analogue at 30  $\mu$ M (insufficient to dissolve stress  
196 granules), we observed signal particularly in nuclei, mitochondria, and stress granules both without  
197 and with crosslinking. Crosslinking increased colocalization with stress granules (Figs. 2C,D and S3F).  
198 Comparison of signal intensity without and with crosslinking suggests that >50% of the analogues are  
199 part of high affinity complexes with fixable macromolecules and/or are covalently bound to proteins  
200 in each compartment (Fig. 2E). We suspect that this represents nonspecific binding of the reduced  
201 dithiolane to proteins. Taken together, these data indicate that lipoamide partitions into stress  
202 granules, along with other organelles.

### 203 **SAR study identifies more potent lipoamide analogues and the dithiolane as a key feature**

204 To determine which chemical features of lipoamide are required for activity, we synthesised a panel of  
205 lipoamide-like compounds and tested the structure-activity relationship (SAR). As a reference, we  
206 confirmed lipoamide potency: lipoamide pre-treatment, in both HeLa and induced pluripotent stem  
207 cells (iPSCs), caused a dose-dependent decrease in stress granule numbers while an increase in  
208 partition of FUS-GFP back to the nucleus with a similar dose-dependency (Fig. 3A). Titration analyses  
209 of the series of lipoamide analogues identified 16 compounds with more than approximately five-fold  
210 increased potency ( $EC_{50} < 2.5 \mu$ M, summarised in Fig. 3B–J), compared to lipoamide. Specifically,  
211 lipoamide derivatives of 6-amino-3-substituted-4-quinazolinones and five-membered  
212 aminoheterocyclic amides represented the most potent analogues (Fig. 3I).

213 The (*R*) and (*S*) isomers of lipoamide and lipoic acid had a similar  $EC_{50}$ , indicating little stereoisomer  
214 specificity (Fig. 3B). The chemical structure of lipoamide is similar to that of the lipoyl moiety, used as  
215 a hydrogen-accepting cofactor by two mitochondrial Krebs cycle enzymes, which is recycled to the  
216 oxidised state by dihydrolipoamide dehydrogenase (DLD, also mitochondrial)<sup>26</sup>. Cells exclusively use  
217 the (*R*)-lipoyl moiety stereoisomer. However, the comparable  $EC_{50}$  between the (*R*)- and (*S*)-isomers of  
218 lipoamide and the absence of a lipoate ligase in eukaryotic cells<sup>26</sup> indicate that lipoamide does not  
219 primarily function through these mitochondrial proteins to effect stress granule dissolution.

220 Mono-methylation of lipoamide on the amide improved the activity, while di-methylation reduced it  
221 (Fig. 3C). However, other disubstituted amide analogues showed activity in the context of more  
222 complex amide structures (Fig 3D). Indeed, many mono-substitutions of the lipoamide amide  
223 improved the activity, with no clear trend for beneficial substitutions, *i.e.*, a relatively 'flat' SAR space  
224 in the carboxamide group. Dissimilar substitutions could similarly increase potency to low  $\mu$ M (Fig. 3E),  
225 while some similar heterocycle substitutions could have a wide range of potencies (Fig. 3F). Activity  
226 could be retained and even increased by shortening the alkane 'backbone' (Fig. 3G). A compound  
227 without a carboxamide or carboxylic acid moiety (*i.e.*, unlike both lipoamide and lipoic acid) was active,  
228 with increased potency (Fig. 3H), although the most potent compounds were mono-substituted  
229 amides (Fig. 3I).

230 Importantly, the dithiolane ring is necessary for activity, indicating a redox activity for stress granule  
231 dissolution. Lipoamide derivatives are likely reduced in the cellular environment. Indeed, the reduced  
232 dihydrolipoamide form was active (Fig. 3J). Furthermore, a labile thiol modification (two thioesters)  
233 was active while non-labile derivatives (thiol benzylation and substitution to a tetrahydrothiophene, a  
234 thiolane ring) were not (Fig. 3J). A six-membered disulfide ring removed activity (Fig. 3J). As redox  
235 potential is linked to disulfide ring size, this also indicated a redox-linked mechanism. Since Edaravone  
236 and ascorbic acid, other redox active compounds<sup>27,28</sup>, did not reduce stress granules at micromolar  
237 concentrations comparable to lipoamide (Fig. 1B and S1G), this suggests that lipoamide is more potent  
238 than those compounds to control stress granule dynamics. Taken together, the SAR suggests that  
239 lipoamide acts through a non-enzymatic route and likely through a redox-associated process.

#### 240 **Lipoamide weakly increases liquidity of FUS condensates *in vitro***

241 To test if lipoamide interacts with known stress granule proteins, we turned again to FUS, using the  
242 classical methods of isothermal titration calorimetry (ITC) and chemical shift perturbation in  
243 “fingerprint” <sup>1</sup>H-<sup>15</sup>N 2D protein NMR spectra. We could not detect interaction of FUS-GFP with  
244 lipoamide *in vitro* by ITC. NMR of the N terminal prion-like domain of FUS showed only extremely weak  
245 <sup>1</sup>H and <sup>15</sup>N shifts in the presence of lipoamide (Fig S4A,B). To test if lipoamide alters FUS condensate  
246 formation, we examined the critical salt concentration and temperature of *in vitro* FUS condensates,  
247 but found no detectable change in the presence of lipoamide (Fig. S4C).

248 We then tested whether lipoamide alters FUS condensate properties, first testing the effect on *in vitro*  
249 condensate liquidity using laser optical tweezers to assay droplet fusion. This showed significantly  
250 decreased droplet fusion times in the presence of lipoamide and thus increased liquidity (higher ratio  
251 of surface tension to viscosity) (Fig. S4D,E). Over time FUS condensates gradually harden, visible as an  
252 increasing viscosity and decreasing mobile fraction of FUS, and eventually forming solid fibres. This is  
253 particularly prominent for condensates of ALS-linked mutant FUS G156E, which hardens then forms  
254 fibres rapidly<sup>12</sup>. We tested whether lipoamide maintains condensate liquidity, using fluorescence  
255 recovery after photobleaching (FRAP). Both lipoamide and lipoic acid reduced FUS G156E-GFP  
256 condensate hardening and fibre formation (Fig. S4F–H).

257 Finally, we turned to mass spectrometry to analyse changes in FUS G156E self-interaction *in vitro* in  
258 the presence of lipoamide. We used lysine-lysine (K-K) chemical crosslinking and, following tryptic  
259 digest, mass spectrometry detection of the cross-linked peptides as evidence for inter- and intra-  
260 molecular interactions under different conditions. This technique requires lysine residues, which the  
261 N-terminal IDR of WT FUS lacks. Therefore, we also analysed a FUS mutant with 12 lysine substitutions  
262 in the N-terminal domain. Lipoamide caused a change, predominantly decrease, in the intensity of  
263 identified K-K cross-linking sites and therefore suggested reduced FUS-FUS interactions (Fig. S4I,J).  
264 Taken together, lipoamide has a weak effect on FUS condensate properties *in vitro* by modulating FUS-  
265 FUS interactions and does so without strong small molecule-protein binding typically detectable by ITC  
266 or NMR.

#### 267 **Lipoamide stabilises proteins with arginine/tyrosine-rich low complexity domains in cells**

268 As the effects of lipoamide on FUS *in vitro* were likely too small to explain the effect of lipoamide on  
269 stress granule dynamics in cells, we turned to thermal proteome profiling (TPP). Here, aliquots of HeLa  
270 cells treated with DMSO (solvent control), lipoamide, arsenate, or lipoamide and arsenate were heated  
271 to a range of different temperatures, and the abundance of soluble proteins was measured by  
272 quantitative mass spectrometry. Relative increase in abundance with temperature is indicative of  
273 protein thermal stability<sup>29,30</sup> (Fig. 4A), summarised as z-scores (Fig. 4B and S5A,B). Increased protein

274 thermal stability in the presence of a small molecule often indicates interaction<sup>31,32</sup>. Thermal stabilities  
275 of proteins in lipoamide vs. lipoamide and arsenate-treated cells showed a strong positive correlation,  
276 but arsenate vs. lipoamide and arsenate-treated cells did not, indicating a dominant effect of lipoamide.  
277 Furthermore, lipoamide treatment also broadly reversed the thermal stability changes occurring due  
278 to arsenate treatment (Fig. S5A,B). Therefore, we focused on the analysis of the sample treated with  
279 both lipoamide and arsenate. As a positive control, we confirmed that the thermal stability of DLD was  
280 weakly but significantly increased, consistent with lipoamide binding to the active site ( $z = 0.66 \pm 0.007$ ,  
281 adjusted  $p$ -value: false discovery rate [FDR] =  $2.6 \times 10^{-4}$ ). As we would predict from its mitochondrial  
282 localization and enzymatic function, RNAi of DLD affected neither stress granule formation nor the  
283 lipoamide activity to prevent it (Fig. S5C). Histone deacetylase 1 (HDAC1) and HDAC2 were also  
284 stabilized ( $z = 3.58$ , FDR =  $1.8 \times 10^{-14}$  and  $z = 4.75$ , FDR =  $7.4 \times 10^{-5}$ , respectively), consistent with a  
285 recent report<sup>33</sup>.

286 Many proteins had higher TPP  $z$ -scores than DLD (Fig. 4B): Lipoamide and arsenate treatment resulted  
287 in significantly increased thermal stability of 70 proteins, while reducing the thermal stability of 144  
288 proteins compared to no treatment (Fig. 4B). Stabilised proteins had disproportionately long IDRs  
289 which contained a disproportionately high proportion of arginine (R), tyrosine (Y), and phenylalanine (F)  
290 residues, while destabilised proteins showed the opposite trend (Fig. 4B–D). R and Y-rich IDRs are  
291 characteristic of stress granule proteins such as the FET family (FUS, TAF15, and EWSR1)<sup>34</sup>, although  
292 their thermal stability was not significantly increased ( $z = 0.84 \pm 1.3$ , FDR = 0.73;  $z = 2.08 \pm 1.5$ , FDR =  
293 0.20;  $z = 0.05 \pm 0.82$ , FDR = 0.87, respectively). This is consistent with no obvious interaction between  
294 FUS and lipoamide *in vitro*. Also, individual FET family proteins are neither necessary for stress granule  
295 formation<sup>10</sup> nor lipoamide activity (Fig. S5C), further indicating that they are not primary targets of  
296 lipoamide for stress granule dissolution.

### 297 **Specific stress granule proteins are necessary for lipoamide activity in cells**

298 To assess which of the proteins identified as interacting with lipoamide by TPP are necessary for  
299 lipoamide activity, we performed an endoribonuclease-prepared small interfering RNA (esiRNA)<sup>35</sup>-  
300 mediated gene knockdown screen of all 122 proteins with increased thermal stability ( $z > 2$ ) (Table S1,  
301 Fig S5A). We looked for the genes whose depletion reduced lipoamide activity in preventing stress  
302 granule formation, which identified two IDR-rich proteins: splicing factor proline- and glutamine-rich  
303 (SFPQ) and splicing factor serine/arginine-rich splicing factor 1 (SRSF1)<sup>36,37</sup>: Lipoamide pre-treatment  
304 failed to prevent stress granule formation in cells with either gene depletion (Figs. 4E,F and S5D). RNAi  
305 of SFPQ or SRSF1 also prevented dissolution of pre-existing stress granules following lipoamide  
306 treatment (Fig. S5E). Stress granule formation was neither exacerbated in stressed cells nor induced in  
307 non-stressed cells by these RNAis, showing that the phenotype of lipoamide pre-treated cells is not  
308 simply due to basal increase in stress granule formation (Figs. 4E,F and S5F).

309 Both SFPQ and SRSF1 are stress granule proteins: like FUS and TDP-43, both localise to the nucleus in  
310 unstressed cells and, in stressed cells, stress granules (Fig. 4G). Therefore, lipoamide activity dissolving  
311 stress granules is dependent on at least two stress granule proteins.

### 312 **Redox state controls SFPQ-mediated dissolution of stress granule protein condensates**

313 The activity of lipoamide requires the redox active dithiolane (Fig. 3J), and SFPQ is notably rich in redox-  
314 sensitive methionine (28 out of 707 amino acids; Fig. 5A). SRSF1 is not methionine-rich with only three  
315 out of 248 amino acids. Pioneering work has previously shown that methionine oxidation modulates  
316 function and material properties of phase separated yeast ataxin-2<sup>38</sup>, and methionine oxidation in  
317 SFPQ has been detected in cells<sup>39</sup>. These suggest that SFPQ may be a main target of lipoamide in a



318 redox-based mechanism of action. We used *in vitro* experiments using pure protein to analyse the  
319 effect of oxidation of SFPQ on condensate formation, using the oxidizing agent hydrogen peroxide  
320 ( $H_2O_2$ ). SFPQ condensation was induced at low salt concentration (75 mM KCl; Fig. S6A). Oxidation of  
321 SFPQ, confirmed by modulated electrophoretic migratory aptitude in non-reducing SDS-PAGE (Fig.  
322 S6B), led to dissolution of SFPQ condensates in an  $H_2O_2$  concentration-dependent manner (Fig. S6A),  
323 similar to the behavior of axixin-2 condensates<sup>38</sup>. This suggests that oxidation alters properties of SFPQ  
324 proteins. In contrast,  $H_2O_2$  alone did not lead to FUS condensate dissolution (Fig. S6A). Therefore,  
325 oxidation-mediated condensate dissolution is specific to a subset of proteins.

326 We next examined functions of SFPQ and its oxidation on FUS condensate dynamics at a physiological  
327 salt concentration (150 mM KCl), which kept SFPQ proteins in diffused state (Fig. S6C). We found that  
328 adding SFPQ prevented FUS condensation (Fig. S6C). This effect did not occur by adding only GFP  
329 proteins (Fig. S6C). However,  $H_2O_2$  treatment restored FUS condensates even in the presence of SFPQ  
330 (Fig. S6D). These suggest that SFPQ proteins dissolve stress granule protein condensates in a redox  
331 state-dependent manner.

332 Based on these *in vitro* results, we hypothesized that stress granule formation would be attenuated if  
333 SFPQ is not oxidizable. To assess this possibility, we aimed to replace methionine with a non-oxidizable,  
334 non-natural analogue L-azidohomoalanine (AHA), normally used for protein labeling<sup>40</sup> (Fig. 5B). Cells  
335 were cultured in methionine-free medium supplemented with AHA for 2 h, resulting in methionine-  
336 to-AHA replacement in newly synthesized proteins, and then stressed with arsenate for 1 h (Fig. S6E).  
337 This resulted in attenuated stress granule formation (Fig. 5C), and normal stress granule formation was  
338 rescued by depletion of SFPQ (Fig. 5C). This suggests that SFPQ in the reduced state is responsible  
339 preventing stress granule formation. One possibility is that cellular stress leads to oxidation of SFPQ,  
340 allowing stress granule condensation. In this scenario, lipoamide reduces SFPQ and restores its stress  
341 granule dissolution activity (Fig. 5D).

#### 342 **Lipoamide treatment rescues nuclear localization and functions of FUS and TDP-43**

343 FUS and TDP-43 have important nuclear functions in unstressed cells. We asked whether lipoamide  
344 treatment not only dissolves stress granules but also returns these proteins to the nucleus. Similar to  
345 FUS-GFP (Fig. 3A), lipoamide pre-treatment increased partition of TDP-43 and the ALS-associated  
346 nuclear localisation sequence mutant FUS P525L-GFP to the nucleus in stressed HeLa cells (Fig. S7A).  
347 To confirm that these effects also occur in cells prominently defective in ALS, we analysed iPSC-derived  
348 motor neurons (MNs). Lipoamide had similar effect on nuclear partitioning of wild-type TDP-43 in  
349 stressed (prolonged oxidative stress with low dose [10  $\mu$ M] of arsenite) and FUS P525L-GFP in non-  
350 stressed but long-cultured conditions (Figs. 6A,B and S7B,C)<sup>41</sup>.

351 We characterised the functional importance of the re-localization to the nucleus by considering FUS  
352 and TDP-43 nuclear functions. FUS forms condensates at DNA damage sites to engage in DNA damage  
353 repair, and this malfunction caused by ALS-linked mutations on FUS is implicated to underlie neuronal  
354 dysfunction in ALS<sup>42</sup>. Lipoamide increased recruitment of FUS-GFP (WT in iPSCs and P525L in iPSC-  
355 derived MNs) to laser-induced DNA damage foci (Fig. 6C,D). TDP-43 contributes to normal transcript  
356 splicing in the nucleus, particularly of Stathmin-2 (STMN2) transcript, and altered *STMN2* splicing  
357 leading to reduced transcript levels is a hallmark of ALS<sup>6,43</sup>. In iPSC-derived MNs, the prolonged  
358 oxidative stress recapitulated reduction in *STMN2* mRNA levels. This reduction in splicing was rescued  
359 by lipoamide treatment, concomitant with TDP-43 nuclear partitioning (Fig. 6B,E). Lipoamide action  
360 therefore dissolves stress granules, allows return of those ALS-linked proteins to the nucleus, and  
361 restores nuclear functions of FUS and TDP-43.

## 362 Lipoamide alleviates ALS phenotypes in familial ALS models

363 The ultimately lethal phenotype of ALS is thought to be caused by axon defects in motor neurons.  
364 Indeed, iPSC-derived MNs expressing FUS P525L show a motor neuron survival defect *in vitro*, with  
365 reduced neurite growth and defective axonal transport<sup>41</sup>. Lipoamide treatment rescued neurite growth  
366 of iPSC-derived MNs stressed with arsenite, shown by increased area covered in neurites in a non-  
367 polarised culture (Fig. 7A). We tested if this correlated with improved axonal transport, by tracking  
368 lysosome transport in iPSC-derived MN axons grown through silicone channels (Fig. 7B). As previously  
369 observed, in an unstressed condition, distal axonal transport of lysosomes was disrupted by expression  
370 of FUS P525L<sup>41</sup>, and lipoamide recovered transport to a similar level to that in WT FUS iPSC-derived  
371 MNs (Fig. 7C,D). Motor neuron degeneration caused by an ALS-associated FUS mutant can therefore  
372 be rescued by lipoamide.

373 Aggregation of TDP-43 and FUS in neurons is a hallmark pathology of ALS, and aggregation of proteins  
374 is also a phenotype of aging more generally, including in *C. elegans*<sup>44</sup>. Feeding lipoic acid (it has higher  
375 solubility in food media than lipoamide) caused a dose-dependent reduction in the number of  
376 aggregates of transgenic PAB-1, an orthologue of the human stress granule protein PABPC1 (Fig. 7E),  
377 but not those of a non-stress granule protein RHO-1 (Fig. S8A)

378 In *D. melanogaster*, motor neuron-specific expression of human FUS and TDP-43 induces ALS-like  
379 phenotypes, including motor defects manifesting as a reduced ability for negative geotaxis<sup>45,46</sup>. Feeding  
380 either lipoamide or lipoic acid improved climbing ability in flies expressing FUS nuclear localizing signal  
381 (NLS) mutants, either FUS P525L or R521C (Figs. 7F and S8B). Similarly, lipoamide feeding alleviated  
382 climbing defects in flies expressing TDP-43, either WT or an ALS-linked mutant M337V (Fig. 7F). The  
383 severe phenotype caused by TDP-43 M337V was associated with abnormal neuromuscular junction  
384 morphology, the presence of satellite boutons, similar to previously described phenotypes of another  
385 ALS-linked mutant TDP-43 G298S<sup>47</sup>. Lipoamide treatment suppressed appearance of satellite boutons  
386 (Fig. S8C). Collectively, our data show that lipoamide can alleviate ALS-like phenotypes in patient-  
387 derived motor neurons and animal models caused by expression of two ALS-associated stress granule  
388 protein mutants.

## 389 Discussion

390 Stress granules are an example of a liquid cellular compartment formed by phase separation. Due to  
391 the strong genetic association of ALS with stress granule proteins, we sought small molecules which  
392 alter the physiological function of stress granule proteins in forming biological condensates. Our screen  
393 identified lipoamide, which partitioned into stress granules in cells and their *in vitro* model  
394 (condensates formed with the stress granule protein FUS). Lipoamide caused rapid disassembly and  
395 prevented formation of stress granules. Our SAR showed the potency of lipoamide for stress granule  
396 dissolution could be increased, particularly by mono-substituted amines and some alkane backbone  
397 modifications.

398 The dithiolane is always required for activity of lipoamide-like molecules. However, the degree to  
399 which other areas of lipoamide could be modified while retaining activity was large. This shows the  
400 lipoamide compound family has potential for medicinal chemistry development. The high degree to  
401 which the non-dithiolane regions could be altered would be surprising for a molecule that binds a  
402 protein at a structured binding site, although this is perhaps unsurprising given the interaction of  
403 lipoamide with intrinsically disordered proteins. Overall, lipoamide is likely therefore acting by  
404 delivering a redox-active dithiolane payload to physicochemical environments formed by its interacting

405 proteins, including stress granules. More active lipoamide derivatives are likely improving targeting  
406 (cell uptake and partition into stress granules) while leaving the dithiolane payload intact.

407 Our work has identified a plausible candidate for the protein likely to sense the redox state of the cell.  
408 Among all the proteins stabilised by lipoamide, our RNAi screen showed only SFPQ and SRSF1 were  
409 necessary for the rapid (<20 minute) lipoamide effect on stress granule dynamics. Both are stress  
410 granule proteins. Uniquely, SFPQ is very methionine-rich, which likely confers high redox sensitivity not  
411 found in most arginine/tyrosine-rich IDR-containing proteins. SFPQ activity was indeed methionine-  
412 and redox-dependent. SFPQ appears the primary target for early lipoamide activity, which overrides  
413 the ability of SFPQ to act as an oxidation sensor, promoting stress granule dissolution only when  
414 reduced. While we saw some effect of lipoamide on FUS condensate liquidity *in vitro*, we suspect that  
415 this is a similar effect of secondary importance on a less redox-sensitive stress granule protein or a  
416 minor effect from strong partitioning of lipoamide into this condensate. Overall, our identification of  
417 lipoamide allowed us to dissect a mechanism where dissolution of stress granule condensates involves  
418 direct redox sensitivity of a key stress granule protein. Lipoamide therefore represents productive  
419 small molecule intervention in an emerging paradigm: redox-sensitivity of proteins able to phase  
420 separate as a homeostatic mechanism<sup>38,48,49</sup>.

421 Oxidative stress is a common theme in ALS pathogenesis mechanisms<sup>50-52</sup>. We showed that lipoamide  
422 can recover pathology in motor neurons and animals expressing ALS-associated stress granule mutants  
423 (FUS and TDP43) with no explicit oxidative stress. This leaves the link between the redox-associated  
424 cellular effects of lipoamide on stress granules and neuron/animal model outcomes ambiguous, but  
425 consistent with modulated stress granule formation in response to stochastic oxidative stresses.  
426 Previous works described that HDAC1 and 2 are responsible for long-term changes in histone  
427 acetylation in motor neurons<sup>53</sup> and that they are inhibited by lipoamide<sup>33</sup>. However, we did not find  
428 them necessary for short-term lipoamide activity on stress granules, instead detecting the two stress  
429 granule proteins both necessary for lipoamide activity. However, this does not preclude long-term  
430 nuclear effects. FUS NLS mutations are strongly associated with ALS<sup>41,54-56</sup> and dissolution of stress  
431 granules by lipoamide leads to return of FUS and TDP-43 to the nucleus. Indeed, we saw lipoamide  
432 does not prevent nuclear FUS condensation and rescues nuclear TDP-43 functions. Ultimately, this  
433 relates to central questions about ALS pathogenesis. Does persistent stress granules or stress granule  
434 protein aggregation lead to harmful (gain-of-function) effects, or is stress granule formation  
435 fundamentally beneficial over a short time scale but, over a long time scale, leads to defects from  
436 nuclear loss-of-function by sequestration of proteins in the stress granules? – overall our results are  
437 consistent with the latter.

438 Although lipoamide does not have the characteristics of a typical therapeutic, it is notable that lipoic  
439 acid is used to treat diabetic neuropathy and, in humans, a 600 mg daily dose gives plasma  
440 concentrations of 8 to 30  $\mu\text{M}$ <sup>57,58</sup>. This is comparable to the concentrations used in our cell-based  
441 assays and we saw beneficial effects in patient-derived motor neurons and *D. melanogaster* models of  
442 ALS. Therefore lipoamide, in addition to allowing our discovery of direct redox sensation by SFPQ for  
443 stress granule dissolution, has some plausibility as the basis of a therapeutic with medicinal chemistry  
444 potential for further improvements. However it is important to point out that we have not shown a  
445 direct relationship between stress granule dissolution and phenotype rescue on our disease models.  
446 Future work will be required to understand the relationship between stress granule formation and  
447 disease in animal models. However the identification of lipoamide provides a powerful tool for such  
448 investigation.

## 449 Methods

### 450 Cells and cell lines

451 Kyoto HeLa cells were maintained in high glucose Dulbecco's modified Eagle's medium (DMEM,  
452 Thermo Fisher Scientific) supplemented with 10% FBS and 1% penicillin-streptomycin at 37°C with 5%  
453 CO<sub>2</sub>. Stable Kyoto HeLa BAC cell lines expressing proteins with a C-terminal fluorescent protein were  
454 generated using BAC recombineering<sup>59</sup>. This gives near-endogenous expression levels of the fusion  
455 protein<sup>12,60</sup>. In these lines, GFP is part of a modified localisation and affinity purification (LAP) tag<sup>61</sup>,  
456 providing a short linker. The stable expression was kept under G418 selection (400 µg/ml; Gibco). The  
457 following BAC lines were used: FUS (MCB\_005340) (used also for the compound screen [see Small  
458 molecule screen]), COIL (MCB\_0002582), DCP1A (MCB\_0003876), EWSR1 (MCB\_0008863), PABPC1  
459 (MCB\_0006901), TIAL1 (MCB\_0008967), and TRP53BP1 (MCB\_0003740). HeLa FUS P525L-GFP cells  
460 were generated similarly to the iPS cell lines as described previously<sup>41</sup>.

461 Human iPS cells were grown in either TeSR E8 or mTeSR1 medium (Stem Cell Technologies) at 37°C  
462 with 5% CO<sub>2</sub> (ref.<sup>62</sup>). iPS cell lines, derived from two different donors, expressing FUS with a C-terminal  
463 GFP fluorescent marker were used. All were generated using CRISPR/Cas9 assisted tagging and  
464 mutagenesis and have been previously described<sup>41</sup>. KOLF iPS cell lines expressing wild-type FUS-GFP  
465 or FUS P525L-GFP were previously generated from the KOLF-C1 clonal iPS cell line produced as part of  
466 the human induced pluripotent stem cell initiative (HipSci)<sup>63</sup>. KOLF-C1 cells were derived from a healthy  
467 male donor. In these lines, GFP is part of a modified localisation and affinity purification (LAP) tag<sup>61</sup>,  
468 giving an identical fusion protein sequence to the Kyoto HeLa BAC cell line. AH-ALS1-F58 iPS cell  
469 expressing FUS P525L with a C-terminal GFP fluorescent marker were previously generated from a  
470 clonal iPS cell line from a female ALS patient expressing FUS P521C. The P525L mutation and GFP tag  
471 were introduced and the P521C mutation corrected by simultaneous tagging and mutagenesis<sup>41,64,65</sup>.

472 MNs for FUS P525L dynamics were induced and maintained as described previously<sup>66</sup>. MNs for the  
473 prolonged arsenite stress assay were derived from commercially available WTC-11 iPS cells (Coriell  
474 Institute GM25256) and differentiated as described previously<sup>67</sup>. MNs for axonal lysosome mobility  
475 assays were generated from AH-ALS1-F58 iPS cells expressing FUS P525L. In short, the iPS cells were  
476 differentiated into neuronal progenitor cells and matured to spinal MNs in Matrigel-coated plates as  
477 previously described<sup>41,62</sup>. The coating and assembly of silicone microfluidic chambers (MFC; RD900,  
478 Xona Microfluidics) to prepare for the subsequent seeding of MNs was performed as described  
479 previously<sup>41,68,69</sup>. MNs were eventually seeded into one side of an MFC for maturation to obtain a fully  
480 compartmentalized culture with proximally clustered somata and their dendrites being physically  
481 separated from their distal axons, as only the latter type of neurite was able to grow from the proximal  
482 seeding site through a microgroove barrier of 900 µm-long microchannels to the distal site (Fig. 7B).  
483 All subsequent imaging in MFCs was performed at day 21 of axonal growth and MN maturation (day 0  
484 = day of seeding into MFCs).

485 All procedures using human cell samples were in accordance with the Helsinki convention and  
486 approved by the Ethical Committee of the Technische Universität Dresden (EK45022009,  
487 EK393122012).

### 488 Recombinant protein purification

489 Recombinant proteins were purified using baculovirus/insect cell expression system, as previously  
490 described<sup>12</sup>. Briefly, 6×His-MBP-FUS-GFP and 6×His-MBP-FUS-SNAP were purified from Sf9 cell lysate  
491 by Ni-NTA (QIAGEN) affinity purification. The 6×His-MBP tag was cleaved by 3C protease, concentrated  
492 by dialysis, and further purified by size exclusion chromatography. 6×His-MBP-SFPQ-GFP was purified

493 from Sf9 cell lysate by affinity purification using Ni-NTA and amylose resin (New England Biolabs). The  
494 6×His-MBP tag and, if necessary, the GFP tag were cleaved by 3C protease and TEV protease,  
495 respectively, and the target proteins were concentrated by dialysis and further purified by cation  
496 exchange chromatography. The composition of the storage buffer for the purified proteins was 1 M or  
497 500 mM KCl, 50 mM Tris-HCl pH 7.4, 5% glycerol and 1 mM DTT, and FUS concentration was adjusted  
498 to 30 μM in storage buffer prior to use.

#### 499 **Small molecule screen**

500 For the small molecule screen we used the PHARMAKON 1600 library of small molecules, prepared as  
501 10 mM solutions in DMSO. The Kyoto HeLa BAC cell line stably expressing FUS-GFP was seeded at 4000  
502 cells per well in 384 well plates 24 h before the assay. The cells were pre-treated with 10 μM compound  
503 for 1 h and then stressed with 1 mM potassium arsenate (A6631, Sigma Aldrich). After 1 h, cells were  
504 fixed in 4% formaldehyde and stained with 1 μg/ml Hoechst 33342 and CellMask blue (1:10,000;  
505 H32720, Thermo Fisher Scientific) before imaged on a CellVoyager CV7000 automated spinning disc  
506 confocal microscope (Yokogawa) with a 40× NA 1.1 air objective to assess FUS-GFP localisation.

507 FUS-GFP signal was analysed using CellProfiler<sup>70</sup>, and the data were processed with KNIME. Cytoplasm  
508 and nuclei were distinguished with weak (CellMask blue) and strong (Hoechst 33342) blue fluorescent  
509 signals, respectively. Particle number and sum area, granularity (at 9, 10, and 11 px in the cytoplasm  
510 or 1, 5, 6, 7, 8, and 9 px in the nucleus) scale, texture (at 10 px scale), and integrated signal intensity of  
511 FUS-GFP in the nucleus and cytoplasm were measured. Z scores ( $z = (x - \mu)/\sigma$  where  $x$  is the observed  
512 value,  $\mu$  the control mean and  $\sigma$  the control standard deviation) relative to the DMSO treated control  
513 wells on each plate were calculated for these parameters and combined into the Mahalanobis distance.  
514 Compounds of interest were selected on the criteria of: treatment returned the cells to the unstressed  
515 state (ie. reducing stress granule number, increasing nuclear signal), a clear monotonic dose  
516 dependent response, and by manual prioritisation by known mechanism (e.g. emetine, cardiac  
517 glycosides) or implausibility as a cell-compatible compound (e.g. surfactants, used as topical  
518 antiseptics).

519 The follow-up *in vitro* assay of compounds on FUS-GFP condensates was assessed in a 384 well plate  
520 format. The compound volume (in DMSO) necessary for 1, 3, 10, 30 or 100 μM final concentration  
521 were added by acoustic dispensing (Labcyte Echo 550) to 96 well plate wells containing FUS-GFP in 3 μl  
522 of 50 mM Tris-HCl pH 7.4, 1 mM DTT, and 170 mM KCl. Final DMSO concentration was 0.01 to 1%.  
523 Using a Freedom Evo 200 liquid handling workstation (TECAN) the FUS-GFP/compound mixture was  
524 diluted in 7 μl 50 mM Tris-HCl pH 7.4 to reach the final composition of 50 mM Tris-HCl pH 7.4, 1 mM  
525 DTT, 50 mM KCl, the indicated concentrations of each compound and DMSO, and 0.7 μM FUS-GFP.  
526 Compound/FUS-GFP and assay buffer were mixed by a standardised pipetting procedure, split to four  
527 wells in clear bottom 384 well plates, and then immediately imaged using a CellVoyager CV7000  
528 automated spinning disc confocal microscope (as above). Condensates in suspension for six fields of  
529 view were imaged as a maximum intensity projection of 6 focal planes at 2 μm steps per sample.  
530 Condensate number and FUS-GFP partition into condensates were analysed with a fixed intensity  
531 threshold using Fiji. Number of condensates and partition were weakly time dependent due to  
532 condensate sedimentation, so normalised assuming a linear change over time by reference to DMSO  
533 controls at the start and end of each plate row.

#### 534 **Compound characterisation on cells**

535 Compound effects were assessed under a variety of conditions in HeLa cells, iPS cells, or iPSC-derived  
536 motor neurons. Unless otherwise indicated, cells were pre-treated for 1 h using 10 μM compounds

537 from 10 mM stock in DMSO (or an equal volume of DMSO control) then stressed for 1 h with 1 mM  
538 potassium arsenate still in the presence of the compounds. Live cells were imaged by widefield  
539 epifluorescence using an inverted Olympus IX71 microscope with a 100× NA 1.4 Plan Apo oil immersion  
540 objective (Olympus) and a CoolSNAP HQ CCD camera (Photometrics), using a DeltaVision climate  
541 control unit (37°C, 5% CO<sub>2</sub>) (Applied Precision).

542 Various cellular stresses were achieved by replacing 1 h 1 mM potassium arsenate treatment with  
543 other conditions: 0.4 M sorbitol (S1876, Sigma Aldrich) from a 4 M stock in water for 1 h (osmotic  
544 stress); 42°C in normal growth medium for 30 min (heat stress); 100 mM 6-deoxyglucose (D9761,  
545 Sigma Aldrich) from a 1 M stock in H<sub>2</sub>O in glucose free DMEM (11966025, Thermo Fisher Scientific)  
546 supplemented with 10% FCS for 1 h (glycolysis stress). L-ascorbic acid (A4544, Sigma Aldrich) was used  
547 from 1 M stock in H<sub>2</sub>O. Sodium arsenite (S7400, Sigma Aldrich) was used from 10 mM stock in H<sub>2</sub>O.

#### 548 **Compound dose responses**

549 Dose dependent effect of lipoamide on HeLa and iPS cells expressing FUS-GFP were assessed with pre-  
550 treatment of lipoamide for 1 h followed by 1 h treatment with 1 mM potassium arsenate similar to the  
551 *ex vivo* HeLa cell screen, except serial compound dilutions in medium were prepared manually from  
552 80 μM to ~0.4 nM at 1.189× dilution steps. Small dilution steps rather than concentration replicates  
553 were selected as it provides greater statistical power from a set number of samples<sup>71</sup>. Final DMSO  
554 concentration was 0.08% in all samples, and each plate included at least 12 control wells with 0.08%  
555 DMSO. Cytoplasmic FUS-GFP condensate number and nuclear/cytoplasm partition of FUS-GFP were  
556 analysed using custom macros in Fiji. Nuclei were identified by intensity thresholding of DNA images  
557 labelled with Hoechst following a 5 px Gaussian blur. Cytoplasmic FUS-GFP condensates were identified  
558 by intensity thresholding of the FUS-GFP images following a 10 px weight 0.9 unsharp filter masked by  
559 the thresholded nuclei. The ratio of the number of cytoplasmic FUS-GFP condensates to that of nuclei  
560 was taken as cytoplasmic FUS-GFP condensates per cell per field of view, and  $p$ , the ratio of partition  
561 of FUS-GFP to the nucleus and the cytoplasm, was derived from  $a = v_n/v_t$ , the ratio of nuclear to total  
562 green signal per field of view, where  $p = a/(1 - a)$ . These data were log transformed and fitted to a  
563 Rodbard sigmoidal curve<sup>72</sup> to determine EC<sub>50</sub>. Six fields of view were captured and analysed per  
564 condition.

565 The series of lipoamide analogues including lipoamide and lipoic acid were newly synthesized by Wuxi  
566 AppTec and provide through Dewpoint Therapeutics. To assess those dose response effect, the HeLa  
567 BAC cells of FUS-GFP were seeded in 384-well plates (4000 cell per well) 24 h prior treatment, pre-  
568 treated with the compounds in a half-log dilution series (from 30 μM to 3 nM: seven concentrations)  
569 using an Echo 650, and followed by a 1 h treatment with 1.5 mM potassium arsenate before fixation  
570 with 4% formaldehyde for 15 min, permeabilization with 0.1% Triton X-100 for 10 min, and counter-  
571 staining with Hoechst and cell mask blue as described above. Imaging was performed using an Opera  
572 Phenix (PerkinElmer), 20×, 9 FOV, binning 2, and using Harmony 4.9 software to determine cytoplasmic  
573 FUS-GFP condensates number as well as cytoplasmic and nuclear FUS-GFP intensities to calculate  
574 nuclear to cytoplasmic ratio of FUS-GFP intensities. EC<sub>50</sub> was calculated either using CDD Vault curve  
575 fitting or Harmony 4.9 software.

#### 576 ***In vitro* protein condensation, solidification, and oxidation assays**

577 For the condensation assay at different KCl concentrations, FUS-GFP proteins in storage buffer was  
578 diluted with 20 mM HEPES pH 7.25 containing DMSO and lipoamide to give 20 μl of indicated  
579 concentrations of the protein and KCl, 0.3 mM DTT, and 300 μM lipoamide (0.3% DMSO), and placed  
580 on a 384-well plate (781096, Greiner). Condensates were imaged on a Nikon TiE inverted microscope

581 with a Nikon Apo 60× NA 1.2 water immersion objective using a Yokogawa CSU-X1 spinning disk head  
582 and an Andor iXon EM+ DU-897 EMCCD camera

583 The assay to determine dilute phase concentrations at different temperature was performed with a  
584 newly established technique, which will be reported in detail elsewhere. In brief, the technique is  
585 based on mass and volume conservation and defined reaction volumes. We can use this method to  
586 determine accurate values for both dilute and condensed branch protein concentrations. Here, FUS-  
587 GFP phase separation was induced for a protein concentration titration in water-in-oil emulsions in a  
588 buffer containing 25 mM Tris-HCl pH 7.4, 150 mM KCl, 1 mM DTT, and the indicated concentrations of  
589 lipoamide (or DMSO as control) and imaged with a CSU-W1 (Yokogawa) spinning disk confocal system  
590 at an IX83 microscope with a 40x UPlanSApo 0.95 NA air objective, controlled via CellSens (Olympus).  
591 The dilute phase protein concentration was derived from a linear fit to the volume fractions of FUS-  
592 GFP condensed phase versus the total concentrations of FUS-GFP. Temperature was controlled using a  
593 custom-made stage<sup>73</sup>.

594 For solidification assays, FUS-GFP in storage buffer was diluted in 50 mM Tris-HCl pH 7.4, 1 mM DTT to  
595 give 10 μM protein, 50 mM Tris-HCl pH 7.4, 1 mM DTT, 50 mM KCl in a 20 μl volume in non-binding  
596 clear bottom 384 well plates (781906, Greiner). Compounds, or an equal volume of DMSO, were then  
597 added for a final compound concentration of 30 μM and 0.3% DMSO. ‘Aging’ to cause fibre formation  
598 was induced by horizontal shaking at 800 rpm at room temperature, as previously described<sup>12</sup>. Fibre  
599 and condensate formation were analysed by widefield epifluorescence using a DeltaVision Elite  
600 microscope (GE Healthcare Life Sciences) with a Plan ApoN 60× NA 1.4 oil immersion objective  
601 (Olympus) and an sCMOS camera (PCO). Fluorescence recovery after photobleaching (FRAP) of FUS-  
602 GFP condensates and fibres was performed on a Nikon TiE inverted microscope with a Nikon Apo 100×  
603 NA 1.49 oil immersion objective using a Yokogawa CSU-X1 spinning disc head and an Andor iXon EM+  
604 DU-897 EMCCD camera. 10×10 px regions were bleached for 50 ns with a 6 mW 405 nm laser using an  
605 Andor FRAPPA beam delivery unit then imaged for 5 min at 5 Hz. Recovery curves were derived using  
606 scripts in Fiji.

607 Oxidation of SFPQ was detected by change in mobility in SDS-PAGE without reducing agents. 10 μM of  
608 untagged SFPQ in buffer (20 mM HEPES pH 7.25 and 150 mM KCl) was incubated with H<sub>2</sub>O<sub>2</sub> at RT for  
609 30 min before subjecting to SDS-PAGE. For condensation assays of individual proteins with H<sub>2</sub>O<sub>2</sub>,  
610 condensates of SFPQ-GFP and FUS-GFP were induced in buffer (20 mM HEPES pH 7.25 and 75 mM KCl).  
611 The assays for dissolution and revival of FUS-SNAP condensates were performed in buffer (20 mM  
612 HEPES pH 7.25 and 150 mM KCl). FUS-SNAP was labelled with SNAP-Surface Alexa Fluor 546 (New  
613 England Biolabs), and protein mixtures were oxidized with H<sub>2</sub>O<sub>2</sub> at RT for 1 h before image acquisition.  
614 Proteins were imaged similarly to FUS-GFP condensates above.

### 615 **Controlled droplet fusion using optical tweezers**

616 Liquidity of FUS protein condensates was assessed by controlled fusion experiments using dual-trap  
617 optical tweezers, as detailed previously<sup>12,34</sup>. In short, for each independent fusion event, two FUS  
618 protein droplets in the presence of 300 μM lipoamide or equivalent amount of DMSO (0.3%) as the  
619 control were trapped in each optical trap and brought into contact to initiate droplet coalescence.  
620 Fusion relaxation times were accurately recorded as changes to the laser signal as condensate material  
621 flows into the space between the two optical traps during coalescence. The laser signal was recorded  
622 at 1 kHz, smoothed at 100 Hz and used to extract the characteristic relaxation time. After fusion was  
623 complete –as indicated by a stable laser signal– the fused droplet was discarded, and two new droplets  
624 were captured for quantifying an independent fusion event.

## 625 **Ex vivo DNA cut assays**

626 UV micro-irradiation was performed as previously described<sup>12,41</sup>. Briefly, iPSCs expressing wild-type  
627 FUS-GFP were stressed by addition of 1 mM arsenate for 1 h, then treated with lipoamide or an equal  
628 volume of DMSO for 1 h. A single point in the nucleus was subject to 3 UV pulses as described for FRAP,  
629 but at 10% laser power. GFP fluorescence was imaged at 1 Hz, and intensity of response was analysed  
630 on Fiji. iPSC-MNs expressing FUS P525L-GFP were pre-treated with 20  $\mu$ M Lipoamide for 24 h before  
631 laser irradiation. The UV laser cutter setup utilized a 355-nm UV-A laser with a pulse length of <350 ps.  
632 A Zeiss alpha Plan-Fluar 100 $\times$  1.45 oil immersion objective was used, and 12 laser shots in 0.5  $\mu$ m-steps  
633 were administered over a 12  $\mu$ m linear cut.

## 634 **NMR for FUS-lipoamide interaction**

635 Untagged FUS low complexity domain (residues 1 to 163) was expressed, purified, and analysed using  
636 <sup>1</sup>H-<sup>15</sup>N heteronuclear single quantum coherence NMR and sample conditions previously described<sup>74</sup> in  
637 the presence of 500  $\mu$ M lipoamide or equivalent DMSO solvent control (1%).

## 638 **NMR for lipoamide concentrations**

### 639 **Synthesis/validation of [15N]-labelled lipoamide**

640 [15N]-racemic ( $\pm$ ) and (*R*)-(+)-lipoamide were synthesized from racemic and (*R*)-(+)-lipoic acid,  
641 respectively, by activating the carboxylic acid using N-hydroxysuccinimide and (1-ethyl-3-(3-  
642 dimethylaminopropyl) carbodiimide hydrochloride. The NHS derivative was reacted with <sup>15</sup>NH<sub>4</sub>Cl to  
643 incorporate the [15N]-labelling. Full details of the synthesis and subsequent biophysical validation are  
644 included in Supplementary Information.

### 645 **NMR based detection and quantification of [15N]-labelled lipoamide**

646 <sup>1</sup>H detected <sup>15</sup>N edited <sup>1</sup>H sensitivity enhanced HSQC NMR ((<sup>15</sup>N)<sup>1</sup>H) spectra were acquired on a 14.1 T  
647 Varian Inova spectrometer equipped with a 5 mm z-axis gradient triple resonance room temperature  
648 probe. The free induction decay was recorded for an acquisition time of 0.0624 s and a sweep width  
649 of 8 kHz recorded over 1000 points and a recovery delay of 1 s. Typically, 10000 transients were  
650 collected giving a total experiment time of 3 h 1 min. The J coupling between the amide protons and  
651 the <sup>15</sup>N in H<sub>2</sub>O samples was determined to be 88 Hz, and so the transfer times of 1/4 J in the INEPT  
652 portions of the pulse sequence were set to 2.6 ms. With these settings, <sup>15</sup>N ammonia or ammonium  
653 ions would not be detectable. Chemical modification of [15N]-lipoamide (including covalent  
654 attachment to an apoenzyme) would give a substantial change in the (<sup>15</sup>N)<sup>1</sup>H NMR spectrum. Similarly,  
655 dissolution of lipoamide in a phospholipid membrane would give substantial peak broadening in the  
656 cell samples. We observed neither, consistent with freely diffusing lipoamide.

### 657 **Optimisation of the NMR measurement conditions of [15N]-labelled lipoamide**

658 Solvent, pH and temperature sensitivity of the primary amide proton chemical shifts were determined  
659 using dummy samples assembled from the appropriate solvent and added compounds.

660 Integrated NMR signal intensity is proportional to concentration if provided conditions (temperature  
661 and pH) are identical<sup>75</sup>. Chemical exchange<sup>76</sup>, expected as the amide protons in lipoamide should be  
662 labile in water, must also be accounted for. To select appropriate conditions, we determined  
663 temperature (Figure S2F) and pH (Figure S2G) sensitivity of the amide proton signal of 1 mM [15N]-  
664 lipoamide in cell medium. Both amide protons showed chemical exchange under high temperature,  
665 high pH conditions, with the trans-amide proton affected weakly (Figure S2F and S2G). We then  
666 assessed degradation of the trans-amide proton over 10 h (Figure S2H). At 37°C, but not 10°C, the



667 signal intensity decayed slowly, suggesting slow hydrolysis to form ammonia. We concluded that at  
668 10°C and below pH 8.6 the integrated signal from the trans-amide proton resonance is a good measure  
669 of [15N]-lipoamide concentration.

## 670 **Quantification of [15N]-lipoamide cellular uptake**

### 671 *Sample preparation workflow*

672 HeLa cells expressing FUS-GFP were grown in 6 well plates to 10<sup>6</sup> cells/well in DMEM supplemented  
673 with 10% FCS. To simultaneously stress and treat cells, the medium was replaced with 0.6 ml medium  
674 supplemented with potassium arsenate and 100 μM [15N]-racemic (±) or (R)-(+)-lipoamide for 1 h at  
675 37°C. High concentrations of compound were used to maximise the signal. The medium was then  
676 removed and retained (medium sample), the cells washed with ~2 ml PBS, then the cells removed by  
677 trypsinisation: addition of 0.3 ml TrypLE Express (12604013, Thermo Fisher Scientific) and incubation  
678 at 37°C for 5 min, then addition of 0.3 ml medium to quench the trypsin. The resuspended cells were  
679 retained (cell sample). All samples were frozen at -80°C. Wells were prepared for all combinations of  
680 no compound (1% DMSO control), [15N]-(±)-lipoamide or [15N]-(R)-(+)-lipoamide, with or without  
681 potassium arsenate and with or without cells.

### 682 *Calculation of cell volume and uptake*

683 The concentrations of [15N]-lipoamide inside ( $C_{cell}$ ) and outside ( $C_{out}$ ) the cells were calculated from  
684 measurements of signal intensity  $S$  of the trans-amide proton of lipoamide acquired in the absence  
685 (–cells, sample i, Figure S2A) and presence (+cells, sample ii, Figure S2A) of HeLa cells, using the  
686 following equations (full derivation included in Supplementary Information):

$$687 \quad C_{out} = (1 - U) \frac{c_{add} V_{add}}{V_{out}}$$

$$688 \quad C_{cell} = U \frac{c_{add} V_{add}}{V_1 N_{cell}}$$

689 where  $N_{cell} = 10^6$ ,  $c_{add} = 100 \mu\text{M}$  and  $V_{add}$  (added volume) = 600 μl,  $V_1 = 4.19 \times 10^{-15} \text{ m}^3$   
690 (approximating HeLa cells as spheres of radius 10<sup>-5</sup> m) and  $U$  represents measured fractional uptake as  
691 given by:

$$692 \quad U = 1 - \frac{S_{+cells}}{S_{-cells}}$$

693

## 694 ***In vitro* partitioning of [15N]-(±)-lipoamide in FUS-GFP condensate phase**

### 695 *Sample preparation workflow*

696 Phase separation of FUS-GFP, at room temperature, was achieved by diluting 12.5 μl of protein stock  
697 at 170 μM concentration (in salty HEPES buffer – 50 mM HEPES, 500 mM KCl and 5% glycerol, at pH  
698 7.25, DTT 1 mM) with 247 μl of salt-free buffer containing [15N]-(±)-lipoamide (50 mM HEPES, 5% D<sub>2</sub>O,  
699 105 μM [15N]-(±)-lipoamide, 1.05% DMSO, at pH 8), resulting into samples of 260 μl with 8 μM FUS-  
700 GFP, 100 μM [15N]-(±)-lipoamide and 25 mM KCl.

701 The sample was centrifuged for 10 min at 4000 ×  $g$  and room temperature and the supernatant kept  
702 for NMR analysis. The remaining supernatant was carefully pipetted out, without disturbing the  
703 condensate pellet, and discarded. Perpendicular view photographs of the pellet were taken. Finally,

704 the condensate pellet was resuspended in 260  $\mu$ l of buffer with the same buffer conditions as the  
705 phase separated sample (50 mM HEPES, 25 mM KCl, pH  $\sim$ 7.4).

706 Resuspended condensate or supernatant were loaded in D<sub>2</sub>O-matched 5 mm Shigemi tubes and  
707 analysed by (<sup>15</sup>N)<sup>1</sup>H NMR. To achieve adequate signal to noise, the resuspended condensate was  
708 scanned for 20 h, while the supernatant was scanned for 4 h. The signal factor (intensity ratio between  
709 the dilute and resuspended condensate samples) was adjusted accounting for differences in sample  
710 volume and number of scans.

#### 711 *Calculation of condensate phase volume*

712 The volume of condensate was calculated from perpendicular photographs (see Fig. S3C), from the  
713 pellet radius (a) and inner radius of the semi-spherical bottom of the microcentrifuge tube (r):

$$714 \quad V = \frac{\pi}{3} r^3 (2 + \cos \theta) (1 - \cos \theta)^2$$

$$715 \quad \theta = \sin^{-1} \frac{a}{r}$$

716  $\theta$  = subtended angle, as showed in Fig. S3C.

717 Calculation of partition coefficient

718 The ratio between the concentration of lipoamide in the condensate and dilute phases (partition  
719 coefficient - PC) was calculated using:

$$720 \quad PC = \frac{V_{Cond} + V_{Added}}{SF * V_{Cond}}$$

721 where  $V_{Cond}$  is the volume of condensate phase,  $V_{Added}$  is the volume added to resuspend the  
722 condensate phase (260  $\mu$ l) and SF is the signal intensity ratio between the dilute phase and the  
723 resuspended condensate measured by NMR.

724 The concentrations of lipoamide in the condensate ( $[L]_{Cond}$ ) and dilute ( $[L]_{Dil}$ ) phases were calculated  
725 as:

$$726 \quad [L]_{Cond} = \frac{[L]_{Tot} * V_{Tot}}{V_{Cond} + \frac{V_{Tot} - V_{Cond}}{PC}}$$

$$727 \quad [L]_{Dil} = \frac{[L]_{Cond}}{PC}$$

728 Where  $[L]_{Tot}$  is the total concentration of [<sup>15</sup>N]-( $\pm$ )-lipoamide and  $V_{Tot}$  is the total volume of the phase  
729 separated sample. The fraction (%) of [<sup>15</sup>N]-( $\pm$ )-lipoamide signal in the condensate phase (see Fig. S3D)  
730 was calculated as:

$$731 \quad \text{Lipoamide condensate signal fraction (\%)} = \frac{1}{1 + SF} * 100$$

732 The full derivation of these expressions can be found in the Supplementary Information.

#### 733 **Crosslinking coupled to Mass Spectrometry (XL-MS)**

734 FUS condensates were processed and analyzed essentially as described previously<sup>77</sup>. In short,  
735 reconstituted droplets of lysine-rich FUS K12 or FUS G156E were generated by low salt (80 mM KCl)

736 and crosslinked by addition of H12/D12 DSS (Creative Molecules) in the presence or absence of  
737 lipoamide for 30 min at 37°C, shaking at 600 rpm. Protein samples were quenched by addition of  
738 ammonium bicarbonate to a final concentration of 50 mM and directly evaporated to dryness. The  
739 dried protein samples were denatured in 8 M Urea, reduced by addition of 2.5 mM TCEP at 37°C for  
740 30 min and subsequently alkylated using 5 mM Iodoacetamide at RT for 30 min in the dark. Samples  
741 were digested by addition of 2% (w/w) trypsin (Promega) over night at 37°C after adding 50 mM  
742 ammonium hydrogen carbonate to a final concentration of 1 M urea. Digested peptides were  
743 separated from the solution and retained by a C18 solid phase extraction system (SepPak Vac 1cc tC18  
744 (50 mg cartridges, Waters) and eluted in 50% ACN, 0.1% FA. Dried peptides were reconstituted in 30%  
745 ACN, 0.1% TFA and then separated by size exclusion chromatography on a Superdex 30 increase  
746 3.2/300 (GE Life Science) to enrich for crosslinked peptides. Peptides were subsequently separated on  
747 a PepMap C18 2  $\mu$ M, 50  $\mu$ M x 150 mm (Thermo Fisher Scientific) using a gradient of 5 to 35% ACN for  
748 45 min. MS measurement was performed on an Orbitrap Fusion Tribrid mass spectrometer (Thermo  
749 Fisher Scientific) in data dependent acquisition mode with a cycle time of 3 s. The full scan was done  
750 in the Orbitrap with a resolution of 120000, a scan range of 400-1500 m/z, AGC Target 2.0e5 and  
751 injection time of 50 ms. Monoisotopic precursor selection and dynamic exclusion was used for  
752 precursor selection. Only precursor charge states of 3-8 were selected for fragmentation by collision-  
753 induced dissociation (CID) using 35% activation energy. MS2 was carried out in the ion trap in normal  
754 scan range mode, AGC target 1.0e4 and injection time of 35 ms. Data were searched using *xQuest* in  
755 ion-tag mode. Carbamidomethylation (+57.021 Da) was used as a static modification for cysteine.  
756 Crosslinks were quantified relative to the condition containing no lipoamide.

## 757 **Transfection**

758 Transfection for gene depletion was performed with Lipofectamine2000 (Thermo Fisher Scientific) and  
759 esiRNA oligos targeting human genes (Eupheria Biotech), as listed in Table S1. esiRNA targeting Renilla  
760 luciferase was used for a negative control. The medium was replaced 5 h after transfection, and the  
761 cells were cultured for 3 days before analysis.

## 762 **Immunocytochemistry of cultured cells**

763 HeLa cells were fixed with 4% paraformaldehyde (PFA) in PBS at room temperature for 15 min, then  
764 washed with PBS containing 30 mM glycine. After permeabilization with 0.1% Triton X-100 in PBS at  
765 4°C and the following wash with glycine-containing PBS, the cells were blocked with 0.2% fish skin  
766 gelatin (Sigma) in PBS (blocking buffer) at room temperature for 20 min, incubated with primary  
767 antibodies in blocking buffer overnight at 4°C, washed with blocking buffer, and incubated with  
768 secondary antibodies and DAPI in blocking buffer at room temperature for 1 h. After washed with  
769 blocking buffer, the samples were stored in PBS until imaging. For detecting endogenous SFPQ, cells  
770 were fixed with cold methanol on ice for 10 min, and blocked with blocking buffer at room temperature  
771 for 20 min before treated with primary antibodies. Samples were imaged on Zeiss LSM 700 or 880  
772 confocal microscopes with a 40 $\times$  NA 1.2 water objective (Zeiss). Segmentation of nuclei, the cytoplasm,  
773 stress granules, and mitochondria, and measurement of fluorescence intensities at each segment were  
774 performed using CellProfiler. The data were then processed using KNIME to calculate number of stress  
775 granules per cell, nuclear-to-cytoplasmic intensity ratio of stress granule proteins, intensity ratio of the  
776 click-crosslink lipoamide analogue (i) at stress granules, mitochondria, and nuclei over the cytoplasm  
777 (excluding stress granules and mitochondria) or (ii) without crosslinking over with crosslinking, and  
778 percent of cells that have more than 2 stress granules.

779 iPSC-MNs were fixed for 15 min at room temperature in 4% PFA in PBS. Permeabilization and blocking  
780 was performed simultaneously using 0.1% Triton X-100, 1% BSA and 10% FBS in PBS at room

781 temperature for 45 min. Subsequently, the primary antibodies were applied overnight at 4 °C in 0.1%  
782 BSA in PBS. The cells were washed with 0.1% BSA in PBS and incubated with secondary antibodies for  
783 1 h at room temperature. Finally, the cells were washed three times with 0.1% BSA in PBS-T (0.005%  
784 Tween-20), including Hoechst or DAPI in the second washing step. Neurofilament H (NF-H) was used  
785 for a marker of MNs. Samples were imaged on either a CellVoyager CV7000 automated spinning disc  
786 confocal microscope (Yokogawa) with a 40× NA 1.3 water objective or a Zeiss LSM880 laser scanning  
787 confocal microscope.

788 The following primary antibodies were used: rabbit anti-G3BP1 (PA5-29455, Thermo Fisher Scientific);  
789 mouse anti-Tom20 (F-10, Santa Cruz); mouse anti-SPFQ (C23, MBL); mouse anti-SRSF1 (103,  
790 Invitrogen); rabbit anti-TDP-43 (80002-1-RR, Proteintech); mouse anti-Neurofilament H (SMI-32,  
791 Millipore); mouse anti-β3 Tubulin (T5076, Sigma-Aldrich). The secondary antibodies used are as  
792 follows: Alexa Fluor 488-conjugated anti-mouse, Alexa Fluor 594-conjugated anti-rabbit, anti-mouse,  
793 and Alexa Fluor 647-conjugated anti-rabbit and anti-mouse (Thermo Fisher Scientific).

#### 794 **UV cross linking and click reaction**

795 HeLa cells were treated with 3 mM arsenate for 1 h, followed by 30 μM of the click-crosslink lipoamide  
796 analog for 30 min in the presence of arsenate. Then the cells were irradiated with a 305 nm light-  
797 emitting diode for 10 sec for cross linking just before fixation with 4% PFA in PBS at room temperature.  
798 The fixed cells were subjected to immunostaining as described above. After staining, the cells were  
799 subjected to click reaction with 2 μM AF594-Picolyl-Azide (CLK-1296-1, Jena Bioscience) in buffer  
800 containing 100 mM HEPES pH 7.25, 5 mM L-ascorbic acid, 0.5 mM THPTA, and 0.1 mM CuSO<sub>4</sub> at 37°C  
801 for 40 min. Cells were then washed three times with 0.1% Triton X-100 in PBS to remove free dye.  
802 Imaging was performed on CSU-W1 (Yokogawa) spinning disk confocal system on an IX83 microscope  
803 (Olympus) with a 100× UPlanSApo 1.4 NA oil objective (Olympus).

#### 804 **Treatment with L-azidohomoalanine (AHA)**

805 Wilde-type HeLa cells were firstly washed with and cultured in methionine (Met)-free medium (Gibco  
806 21013-24) supplemented with 10% FBS for 1 h. Then the medium was replaced with complete medium  
807 or Met-free medium supplemented with 1 mM of Met (Sigma M9625) or AHA (Invitrogen C10102) for  
808 2 h before the cells were stressed with 1 mM arsenate for 1 h. After fixation with 4% PFA in PBS, the  
809 cells were subjected to immunostaining to label G3BP1.

#### 810 **Time-lapse imaging**

811 Time-lapse imaging was performed at 37°C with 5% CO<sub>2</sub>. iPSC-derived MNs were treated with 20 μM  
812 lipoamide or 0.02% DMSO (control) for 1 h and then treated with 20 μM arsenite just before image  
813 acquisition. Maximum projection images were generated, and number of FUS-GFP foci was quantified  
814 by Fiji.

#### 815 **Axonal transport assays**

816 AH-ALS1-F58 iPS MNs expressing P525L FUS were treated with 2 μM compound or an equal volume of  
817 DMSO for 3 days. Longer incubation was selected to ensure penetration and action of compounds  
818 along the length of the axon channel. 2 μM was selected as the highest concentration where there  
819 were no toxic effects on this iPS line (assessed qualitatively). Analysis of axonal transport of lysosomes  
820 were performed as previously described<sup>41</sup>. Briefly, lysosomes were labelled by addition of 50 nM  
821 lysotracker red (Thermo Fisher Scientific) and imaged using a Leica DMI6000 inverted microscope with  
822 a 100× NA 1.46 oil immersion objective and an Andor iXON 897 EMCCD camera in an incubator  
823 chamber (37°C, 5% CO<sub>2</sub>) at 3 Hz for 120 s at either the proximal or distal end of the silicone channels

824 harbouring the axons. Kymographs were generated on Fiji. Particle tracking was used to identify  
825 proportion of particles moving faster than 0.2  $\mu\text{m/s}$  for five videomicrographs. Each video includes a  
826 variable population of non-moving background particles, therefore, for each biological replicate, data  
827 were normalised to the mean proportion of moving lysosomes ( $>0.2 \mu\text{m/s}$ ) at either MFC site (proximal  
828 and distal) in the DMSO (solvent control)-treated FUS P525L samples in Fig. 7D.

### 829 **Protein aggregation in *C. elegans***

830 The effect of lipoic acid on stress granule protein aggregation *in vivo* was analysed using a *C. elegans*  
831 model for stress granule formation and aggregation. As previously described<sup>44,78</sup>, fluorescent-tagged  
832 PAB-1 forms abundant stress granules and large solid aggregates during aging or upon chronic stress.  
833 RHO-1 also aggregates during aging, but is not an RNA binding or stress granule protein. Two lines  
834 were used: Fluorescently tagged PAB-1 (DCD214: N2; *uqls24[pmyo-2::tagrfp::pab1gene]*) and RHO-1  
835 (DCD13: N2; *uqls9[pmyo-2::rho-1::tagrfp+ptph-1::gfp]*). Each were analysed as below, except DCD13  
836 were maintained at 20°C.

837 The animals were exposed to lipoic acid in liquid culture in a 96 well plate starting from larval stage L4  
838 in a total volume of 50  $\mu\text{l}$  S-Complete per well (100 mM NaCl, 50 mM Potassium phosphate pH 6,  
839 10 mM potassium citrate, 3 mM  $\text{MgSO}_4$ , 3 mM  $\text{CaCl}_2$ , 5  $\mu\text{g/mL}$  cholesterol, 50  $\mu\text{M}$   
840 ethylenediaminetetraacetic acid (EDTA), 25  $\mu\text{M}$   $\text{FeSO}_4$ , 10  $\mu\text{M}$   $\text{MnCl}_2$ , 10  $\mu\text{M}$   $\text{ZnSO}_4$ , 1  $\mu\text{M}$   $\text{CuSO}_4$ )  
841 supplemented with heat-killed OP50 and 50  $\mu\text{g/ml}$  carbenicillin. Per experiment, a minimum of nine  
842 wells each with 13 animals were treated with R-(+) or S-(-)-lipoic acid or an equivalent volume of  
843 DMSO.

844 48 h after switching the L4s from 20°C to 25°C (day 2 of adulthood) extensive aggregation of  
845 fluorescently tagged PAB-1 and RHO-1 occurs in the pharyngeal muscles. After immobilization with  
846 2 mM levamisole aggregation was scored using a fluorescent stereo microscope (Leica M165 FC, Plan  
847 Apo 2.0 $\times$  objective). For PAB-1, aggregates occurred primarily in the terminal bulb of the pharynx, and  
848 aggregation was scored by the number of aggregates ( $>10$  per animal). For RHO-1, aggregates were  
849 scored in the isthmus of the pharynx and aggregation was scored as high ( $>50\%$  of the isthmus),  
850 medium ( $<50\%$ ) or low (no aggregation). High-magnification images were acquired with a Leica SP8  
851 confocal microscope with a HC Plan Apo CS2 63 $\times$  NA 1.40 oil objective using a Leica HyD hybrid detector.  
852 tagRFP::PAB-1 was detected using 555 nm as excitation and an emission range from 565-650 nm.  
853 Representative confocal images are displayed as maximum z stack projection.

### 854 ***D. melanogaster* ALS models**

855 All fly stocks were maintained on standard cornmeal at 25°C in light/dark controlled incubator. *w<sup>1118</sup>*,  
856 *UAS-eGFP*, *D42-GAL4*, and *OK6-Gal4* flies were obtained from Bloomington Drosophila Stock Center.  
857 *UAS-FUS WT*, *UAS-FUS P525L*, and *UAS-FUS R521C* flies were previously described<sup>45,79</sup>. *UAS-TDP-43 WT*  
858 and *UAS-TDP-43 M337V* flies were provided by J. Paul Taylor<sup>80</sup>.

859 Tissue-specific expression of the human genes was performed with the Gal4/UAS-system<sup>81</sup>. Climbing  
860 assays were performed as previously described<sup>79</sup>. Briefly, flies expressing eGFP, human FUS, or TDP-43  
861 were grown in the presence or absence of Lipoic Acid (430  $\mu\text{M}$ , ethanol as the vehicle control) or  
862 Lipoamide (430  $\mu\text{M}$ , DMSO as the vehicle control), then anesthetised, placed into vials and allowed to  
863 acclimatise for 15 min in new vials. Feeding these compounds did not show obvious lethality or toxicity  
864 at this concentration. For each fly genotype, the vial was knocked three times on the base on a bench  
865 and counted the flies climbing up the vial walls. The percentage of flies that climbed 4 cm in 30 s was  
866 recorded. TDP-43-expressing flies were raised at 18°C to suppress lethality.

867 For immunohistochemistry of neuromuscular junctions, parent flies were crossed on food  
868 supplemented with DMSO or lipoamide, and the offspring were raised on the same food. Wandering  
869 third instar larvae were dissected and subjected to immunostaining as described previously<sup>82</sup>. Briefly,  
870 the dissected larvae were fixed with 4% PFA in PBS at room temperature for 20 min, then washed with  
871 PBS. After removing unnecessary tissues, the samples were blocked with 0.2% fish skin gelatin (Sigma)  
872 and 0.1% Triton X-100 in PBS (blocking buffer) at room temperature for 1 h, incubated with anti-HRP-  
873 Cy3 (1:200, Jackson ImmunoResearch) in blocking buffer overnight at 4°C, washed with 0.2% Triton X-  
874 100 in PBS (PBT), and incubated with Alexa Fluor 488 Phalloidin (1:5000, Thermo Fisher Scientific) at  
875 room temperature for 2 h to visualize muscles. The samples were then washed with PBT and mounted  
876 with 70% glycerol in PBS. Synaptic boutons of muscle 4 in abdominal segments 2, 3, and 4 (A2–A4)  
877 were imaged using Zeiss LSM 700 or 880 confocal microscopes with a 40× NA 1.2 water objective  
878 (Zeiss). Numbers of synaptic boutons and satellite boutons were counted manually.

### 879 **Quantitative RT-PCR (qPCR)**

880 qPCR was performed with primers targeting GAPDH (control) and full-length STMN2, as described  
881 previously<sup>83</sup>.

### 882 **Thermal proteome profiling (TPP)**

883 Thermal proteome profiling was performed as described previously<sup>31</sup>. In brief, two 150 mm dishes of  
884 HeLa cells (~6 million cells per dish) were treated with 0.1% (v/v) DMSO (control) or 100 μM lipoamide  
885 for 1 h. At the end of incubation one lipoamide- and one DMSO-treated dishes of HeLa cell were  
886 stressed with 1 mM arsenate for 1 h. The second set of cells served as the control (treatment with  
887 water, vehicle in which arsenate was dissolved) for only lipoamide treatment and only DMSO  
888 treatment. All incubations were performed at 37°C with 5% CO<sub>2</sub>. Following the incubation, the cells  
889 were washed with PBS and trypsinized. The cells were collected by centrifugation at 300 × *g* for 3 min.  
890 The cell pellet was re-suspended in PBS containing the appropriate treatment concentrations of the  
891 compounds (lipoamide, DMSO, and arsenate) at cell density of 4 × 10<sup>6</sup> cells/ml. This cell suspension  
892 was split into 10 × 100 μl aliquots on a PCR plate, spun at 1000 × *g* for 3min, and finally 80 μl of  
893 supernatant (PBS) was subsequently removed. The cell aliquots were then heated to ten to different  
894 temperatures (37.0, 40.4, 44.0, 46.9, 49.8, 52.9, 55.5, 58.6, 62.0, and 66.3°C) for 3 min in a  
895 thermocycler (SureCycler 8800, Agilent) and left at room temperature for 3 min. Subsequently, the  
896 cells were lysed with 30 μl of lysis buffer (PBS containing protease inhibitors, 1.12% NP-40, 2.1 mM  
897 MgCl<sub>2</sub>, and phosphatase inhibitors), and the PCR plates containing the cell lysate was centrifuged at  
898 1000 × *g* for 5 min to remove cell debris. Next, the heat-induced protein aggregates were removed  
899 from the cleared supernatant by passing it through a 0.45 μm 96-well filter plate (Millipore) at 500 ×  
900 *g* for 5 min. Equal volumes of the flow-through and 2× sample buffer (180 mM Tris-HCl pH 6.8, 4% SDS,  
901 20% glycerol, and 0.1 g bromophenol blue) were mixed and stored in –20°C until used for mass  
902 spectrometry sample preparation. Protein digestion, peptide labelling and mass spectrometry-based  
903 proteomics were performed as previously described<sup>32</sup>.

### 904 **Data analysis of TPP**

905 Abundance and thermal stability scores for every protein was calculated as described previously<sup>30,84</sup>.  
906 Briefly, the ratio of the normalized tandem mass tag (TMT) reporter ion intensity in each treatment  
907 (only lipoamide, only arsenate, lipoamide and arsenate) and the control (only DMSO) was calculated  
908 for each temperature. The abundance score for each protein was calculated as the average log<sub>2</sub> fold  
909 change (FC) at the two lowest temperatures:

910 
$$Abundance\ score = \frac{\log_2 FC_{37.0^\circ C} + \log_2 FC_{40.4^\circ C}}{2}$$

911 The thermal stability score for each protein was computed by subtracting the abundance score from  
912 the  $\log_2$  fold changes of all temperatures, and then summing the resulting fold changes (requiring that  
913 there were at least ten data points to calculate this score):

914 
$$Thermal\ stability\ score = \sum_T (\log_2 FC_T - Abundance\ score)$$

915 where  $T$  is the ten temperatures. Both the abundance and the thermal stability scores were  
916 transformed into a z-distribution by subtracting the mean and dividing by the standard deviation. The  
917 significance of the abundance and thermal stability scores was further assessed using *limma*<sup>85</sup> (the two  
918 scores were weighted for the number of temperatures in which a protein was identified), followed by  
919 FDR estimation using the *fdrtool* package<sup>86</sup>. Proteins with  $|z\text{-score}| > 1.5$  and with  $FDR < 0.05$  were  
920 considered to be significant changes for the IDR analyses. Thermal stability scores indicated in the  
921 result section are those in cells treated with lipoamide and arsenate.

## 922 **Bioinformatics**

923 Positions of amino acid sequences with disordered tendency were visualized using IUPred3  
924 (<https://iupred.elte.hu/>). Length of IDRs in each protein was estimated using d2p2 database  
925 (<https://d2p2.pro/>)<sup>87</sup>. The IDR is defined as a region which is regarded as being disordered in more  
926 than 75% of all predictors in the database as well as with more than ten successive disordered amino  
927 acids. Then proportion of IDR(s) to the whole protein amino acid length was calculated. Enrichment of  
928 individual amino acids in IDRs were calculated using Composition Profiler (<http://www.cprofiler.org/>)<sup>88</sup>.  
929 IDRs of all the proteins detected in TPP were used as a background. Positive and negative scores  
930 indicate enrichment and depletion of each amino acid compared to the background, respectively.

## 931 **Statistical analysis**

932 Statistical analyses were performed using the R statistical software or GraphPad Prism. The statistical  
933 details (the  $p$ -value, the number of samples, and the statistical test used) are specified in the figure  
934 panels or legends. A  $p$ -value below 0.05 was considered statistically significant.

## 935 **Data availability**

936 The mass spectrometry proteomics data have been deposited to the ProteomeXchange Consortium  
937 via the PRIDE<sup>89</sup> partner repository with the dataset identifiers PXD039670 (for the crosslinking assay)  
938 and PXD039501 (for the TPP assay).

## 939 **Acknowledgements**

940 We thank J.P. Taylor for providing fly strains; the following services and facilities of the MPI-CBG for  
941 their support: fly team, LMF, PEPC, TDS, Scientific computing facility, and OSCF; J. Robertson for his  
942 advice in the characterization of [15N]-labelled lipoamide; C. Möbius for helping on plate-based cell  
943 imaging; C. Höge for valuable comments on the manuscript; members in the Hyman lab and in the  
944 MPI-CBG for valuable discussion.

## 945 **Funding**

946 Hiroyuki Uechi Uehara Memorial Foundation; JSPS Overseas Research Fellowships;  
947 The Osamu Hayaishi Memorial Scholarship for Study Abroad

948 Marcus Jahnel The Deutsche Forschungsgemeinschaft (DFG, German Research  
949 Foundation) under Germany's Excellence Strategy – EXC-2068 –  
950 390729961  
951 Simon Alberti European Research Council (grant agreement number 725836)  
952 Nicolas L. Fawzi National Institute of General Medical Sciences (NIGMS) of the National  
953 Institutes of Health (R01GM147677) and the National Science  
954 Foundation (1845734)  
955 Della C. David Deutsches Zentrum für Neurodegenerative Erkrankungen (DZNE)  
956 Andreas Hermann NOMIS foundation, an unrestricted grant by a family of a deceased  
957 ALS patient, the Stiftung zur Förderung der Hochschulmedizin in  
958 Dresden and the Hermann und Lilly Schilling-Stiftung für medizinische  
959 Forschung im Stifterverband.  
960 Florian Stengel The German Research Foundation (STE 2517/1-1 and STE 2517/5-1)  
961 Richard J. Wheeler Wellcome Trust Sir Henry Wellcome (211075/Z/18/Z) and Sir Henry  
962 Dale (103261/Z/13/Z) Fellowships  
963 Satoshi Kishigami Ishizaka Memorial Foundation; Ezoë Memorial Foundation; Shigeta  
964 Foundation  
965 BGD and AJB Next Generation Chemistry at the Rosalind Franklin Institute is funded  
966 by the EPSRC EP/V011359/1  
967

## 968 Conflict of interest statement

969 Anthony Hyman is the Scientific Founder of Dewpoint Therapeutics; Anthony Hyman and Simon Alberti  
970 are Dewpoint Therapeutics shareholders; Richard Wheeler is a Scientific Advisor for Dewpoint  
971 Therapeutics; António M. de Jesus Domingues is an employee of Dewpoint Therapeutics, but his  
972 contribution was prior to his employment. Anthony Hyman, Mark Bickle and Richard Wheeler filed a  
973 patent related to this work (US20200150107A1 and synchronized worldwide applications). Dewpoint  
974 Therapeutics contributed intellectually to this work in the structure-activity relationship analysis of  
975 lipoamide analogs. All other experimental work either predates foundation of Dewpoint Therapeutics  
976 or was carried out independently.

## 977 References

- 978 1. Robberecht, W. & Philips, T. The changing scene of amyotrophic lateral sclerosis. *Nature*  
979 *Reviews Neuroscience* **14**, 248–264 (2013).
- 980 2. Miller, R. G., Mitchell, J. D. & Moore, D. H. Riluzole for amyotrophic lateral sclerosis  
981 (ALS)/motor neuron disease (MND). *Cochrane Database Syst. Rev.* (2012).  
982 doi:10.1002/14651858.CD001447.PUB3/INFORMATION/EN
- 983 3. Abe, K. *et al.* Safety and efficacy of edaravone in well defined patients with amyotrophic  
984 lateral sclerosis: a randomised, double-blind, placebo-controlled trial. *Lancet Neurol.* **16**, 505–



- 985 512 (2017).
- 986 4. Paganoni, S. *et al.* Trial of Sodium Phenylbutyrate–Taurursodiol for Amyotrophic Lateral  
987 Sclerosis. *N. Engl. J. Med.* **383**, 919–930 (2020).
- 988 5. Deng, H., Gao, K. & Jankovic, J. The role of FUS gene variants in neurodegenerative diseases.  
989 *Nature Reviews Neurology* **10**, 337–348 (2014).
- 990 6. Lee, E. B., Lee, V. M. Y. & Trojanowski, J. Q. Gains or losses: Molecular mechanisms of TDP43-  
991 mediated neurodegeneration. *Nature Reviews Neuroscience* **13**, 38–50 (2012).
- 992 7. Taylor, J. P., Brown, R. H. & Cleveland, D. W. Decoding ALS: From genes to mechanism.  
993 *Nature* **539**, 197–206 (2016).
- 994 8. Yamazaki, T. *et al.* Functional Domains of NEAT1 Architectural lncRNA Induce Paraspeckle  
995 Assembly through Phase Separation. *Mol. Cell* **70**, 1038-1053.e7 (2018).
- 996 9. Pessina, F. *et al.* DNA Damage Triggers a New Phase in Neurodegeneration. *Trends in Genetics*  
997 **37**, 337–354 (2021).
- 998 10. Yang, P. *et al.* G3BP1 Is a Tunable Switch that Triggers Phase Separation to Assemble Stress  
999 Granules. *Cell* **181**, 325-345.e28 (2020).
- 1000 11. Protter, D. S. W. & Parker, R. Principles and Properties of Stress Granules. *Trends Cell Biol.* **26**,  
1001 668–679 (2016).
- 1002 12. Patel, A. *et al.* A Liquid-to-Solid Phase Transition of the ALS Protein FUS Accelerated by  
1003 Disease Mutation. *Cell* **162**, 1066–1077 (2015).
- 1004 13. Molliex, A. *et al.* Phase Separation by Low Complexity Domains Promotes Stress Granule  
1005 Assembly and Drives Pathological Fibrillization. *Cell* **163**, 123–133 (2015).
- 1006 14. Conicella, A. E., Zerbe, G. H., Mittal, J. & Fawzi, N. L. ALS Mutations Disrupt Phase Separation  
1007 Mediated by  $\alpha$ -Helical Structure in the TDP-43 Low-Complexity C-Terminal Domain. *Structure*  
1008 **24**, 1537–1549 (2016).
- 1009 15. Li, Y. R., King, O. D., Shorter, J. & Gitler, A. D. Stress granules as crucibles of ALS pathogenesis.  
1010 *J. Cell Biol.* **201**, 361–372 (2013).
- 1011 16. Neumann, M. *et al.* BRAIN A JOURNAL OF NEUROLOGY FET proteins TAF15 and EWS are  
1012 selective markers that distinguish FTLD with FUS pathology from amyotrophic lateral sclerosis  
1013 with FUS mutations. (2022). doi:10.1093/brain/awr201
- 1014 17. Sreedharan, J. *et al.* TDP-43 mutations in familial and sporadic amyotrophic lateral sclerosis.  
1015 *Science* **319**, 1668–1672 (2008).
- 1016 18. Kwiatkowski, T. J. *et al.* Mutations in the FUS/TLS gene on chromosome 16 cause familial  
1017 amyotrophic lateral sclerosis. *Science (80-. )*. **323**, 1205–1208 (2009).
- 1018 19. Arseni, D. *et al.* Structure of pathological TDP-43 filaments from ALS with FTLD. *Nature* **601**,  
1019 139–143 (2022).
- 1020 20. Kroschwald, S. *et al.* Promiscuous interactions and protein disaggregases determine the  
1021 material state of stress-inducible RNP granules. *Elife* **4**, (2015).
- 1022 21. Kroschwald, S., Maharana, S. & Simon, A. Hexanediol: a chemical probe to investigate the  
1023 material properties of membrane-less compartments. *Matters* (2017).  
1024 doi:10.19185/matters.201702000010

- 1025 22. Perdikari, T. M., Murthy, A. C. & Fawzi, N. L. Molecular insights into the effect of alkanediols  
1026 on FUS liquid-liquid phase separation. *bioRxiv* 2022.05.05.490812 (2022).  
1027 doi:10.1101/2022.05.05.490812
- 1028 23. Kedersha, N. *et al.* Dynamic Shuttling of TIA-1 Accompanies the Recruitment of mRNA to  
1029 Mammalian Stress Granules 7. *J. Cell Biol.* **151**, 1257–1268 (2000).
- 1030 24. Petrov, D., Mansfield, C., Moussy, A. & Hermine, O. ALS clinical trials review: 20 years of  
1031 failure. Are we any closer to registering a new treatment? *Front. Aging Neurosci.* **9**, 68 (2017).
- 1032 25. Krance, S. H. *et al.* Cellular models for discovering prion disease therapeutics: Progress and  
1033 challenges. *J. Neurochem.* **153**, 150–172 (2020).
- 1034 26. Solmonson, A. & DeBerardinis, R. J. Lipoic acid metabolism and mitochondrial redox  
1035 regulation. *J. Biol. Chem.* **293**, 7522–7530 (2018).
- 1036 27. Arumugam, S. *et al.* Beneficial effects of edaravone, a novel antioxidant, in rats with dilated  
1037 cardiomyopathy. *J. Cell. Mol. Med.* **16**, 2176–2185 (2012).
- 1038 28. Yoshida, H. *et al.* Neuroprotective Effects of Edaravone: a Novel Free Radical Scavenger in  
1039 Cerebrovascular Injury. *CNS Drug Rev.* **12**, 9–20 (2006).
- 1040 29. Becher, I. *et al.* Pervasive Protein Thermal Stability Variation during the Cell Cycle. *Cell* **173**,  
1041 1495–1507.e18 (2018).
- 1042 30. Mateus, A. *et al.* The functional proteome landscape of Escherichia coli. *Nature* **588**, 473–478  
1043 (2020).
- 1044 31. Savitski, M. M. *et al.* Tracking cancer drugs in living cells by thermal profiling of the proteome.  
1045 *Science (80-. )*. **346**, (2014).
- 1046 32. Sridharan, S. *et al.* Proteome-wide solubility and thermal stability profiling reveals distinct  
1047 regulatory roles for ATP. *Nat. Commun.* **10**, 1–13 (2019).
- 1048 33. Lechner, S. *et al.* Chemoproteomic target deconvolution reveals Histone Deacetylases as  
1049 targets of (R)-lipoic acid. *Nat. Commun.* 2023 141 **14**, 1–10 (2023).
- 1050 34. Wang, J. *et al.* A Molecular Grammar Governing the Driving Forces for Phase Separation of  
1051 Prion-like RNA Binding Proteins. *Cell* **174**, 688–699.e16 (2018).
- 1052 35. Kittler, R. *et al.* Genome-wide resources of endoribonuclease-prepared short interfering RNAs  
1053 for specific loss-of-function studies. *Nat. Methods* 2007 44 **4**, 337–344 (2007).
- 1054 36. Lim, Y. W., James, D., Huang, J. & Lee, M. The emerging role of the rna-binding protein sfpq in  
1055 neuronal function and neurodegeneration. *International Journal of Molecular Sciences* **21**, 1–  
1056 16 (2020).
- 1057 37. Das, S. & Krainer, A. R. Emerging functions of SRSF1, splicing factor and oncoprotein, in RNA  
1058 metabolism and cancer. *Molecular Cancer Research* **12**, 1195–1204 (2014).
- 1059 38. Kato, M. *et al.* Redox State Controls Phase Separation of the Yeast Ataxin-2 Protein via  
1060 Reversible Oxidation of Its Methionine-Rich Low-Complexity Domain. *Cell* **177**, 711–721.e8  
1061 (2019).
- 1062 39. Ghesquière, B. *et al.* Redox proteomics of protein-bound methionine oxidation. *Mol. Cell.*  
1063 *Proteomics* **10**, (2011).
- 1064 40. Van Kasteren, S. I. *et al.* Expanding the diversity of chemical protein modification allows post-  
1065 translational mimicry. *Nat.* 2007 4467139 **446**, 1105–1109 (2007).

- 1066 41. Naumann, M. *et al.* Impaired DNA damage response signaling by FUS-NLS mutations leads to  
1067 neurodegeneration and FUS aggregate formation. *Nat. Commun.* **9**, (2018).
- 1068 42. Wang, H. *et al.* Mutant FUS causes DNA ligation defects to inhibit oxidative damage repair in  
1069 Amyotrophic Lateral Sclerosis. *Nat. Commun.* **2018 91 9**, 1–18 (2018).
- 1070 43. Klim, J. R. *et al.* ALS-implicated protein TDP-43 sustains levels of STMN2, a mediator of motor  
1071 neuron growth and repair. *Nat. Neurosci.* **22**, 167–179 (2019).
- 1072 44. Lechler, M. C. *et al.* Reduced Insulin/IGF-1 Signaling Restores the Dynamic Properties of Key  
1073 Stress Granule Proteins during Aging. *Cell Rep.* **18**, 454–467 (2017).
- 1074 45. Lanson, N. A. *et al.* A Drosophila model of FUS-related neurodegeneration reveals genetic  
1075 interaction between FUS and TDP-43. *Hum. Mol. Genet.* **20**, 2510–2523 (2011).
- 1076 46. Uechi, H. *et al.* Ubiquitin-Binding Protein CG5445 Suppresses Aggregation and Cytotoxicity of  
1077 Amyotrophic Lateral Sclerosis-Linked TDP-43 in Drosophila. *Mol. Cell. Biol.* **38**, (2018).
- 1078 47. Coyne, A. N. *et al.* Fragile X protein mitigates TDP-43 toxicity by remodeling RNA granules and  
1079 restoring translation. *Hum. Mol. Genet.* **24**, 6886–6898 (2015).
- 1080 48. Saito, Y. & Kimura, W. Roles of Phase Separation for Cellular Redox Maintenance. *Front.*  
1081 *Genet.* **12**, 691946 (2021).
- 1082 49. Huang, X. *et al.* ROS regulated reversible protein phase separation synchronizes plant  
1083 flowering. *Nat. Chem. Biol.* **2021 175 17**, 549–557 (2021).
- 1084 50. Mead, R. J., Shan, N., Reiser, H. J., Marshall, F. & Shaw, P. J. Amyotrophic lateral sclerosis: a  
1085 neurodegenerative disorder poised for successful therapeutic translation. *Nat. Rev. Drug*  
1086 *Discov.* **2022 223 22**, 185–212 (2022).
- 1087 51. Cunha-Oliveira, T. *et al.* Oxidative Stress in Amyotrophic Lateral Sclerosis: Pathophysiology  
1088 and Opportunities for Pharmacological Intervention. *Oxid. Med. Cell. Longev.* **2020**, (2020).
- 1089 52. Motataianu, A., Serban, G., Barcutean, L. & Balasa, R. Oxidative Stress in Amyotrophic Lateral  
1090 Sclerosis: Synergy of Genetic and Environmental Factors. *Int. J. Mol. Sci.* **2022, Vol. 23, Page**  
1091 **9339 23**, 9339 (2022).
- 1092 53. Kuta, R. *et al.* Depending on the stress, histone deacetylase inhibitors act as heat shock  
1093 protein co-inducers in motor neurons and potentiate arimoclomol, exerting neuroprotection  
1094 through multiple mechanisms in ALS models. *Cell Stress Chaperones* **25**, 173–191 (2020).
- 1095 54. Naumann, M. *et al.* Phenotypes and malignancy risk of different FUS mutations in genetic  
1096 amyotrophic lateral sclerosis. *Ann. Clin. Transl. Neurol.* **6**, 2384–2394 (2019).
- 1097 55. Dormann, D. & Haass, C. TDP-43 and FUS: A nuclear affair. *Trends in Neurosciences* **34**, 339–  
1098 348 (2011).
- 1099 56. Dormann, D. *et al.* Arginine methylation next to the PY-NLS modulates Transportin binding  
1100 and nuclear import of FUS. *EMBO J.* **31**, 4258–4275 (2012).
- 1101 57. Amenta, F., Traini, E., Tomassoni, D. & Mignini, F. Pharmacokinetics of Different Formulations  
1102 of Tioctic (Alpha-Lipoic) Acid in Healthy Volunteers.  
1103 <http://dx.doi.org/10.1080/10641960802563568> **30**, 767–775 (2009).
- 1104 58. Teichert, J., Hermann, R., Ruus, P. & Preiss, R. Plasma Kinetics, Metabolism, and Urinary  
1105 Excretion of Alpha-Lipoic Acid following Oral Administration in Healthy Volunteers. *J. Clin.*  
1106 *Pharmacol.* **43**, 1257–1267 (2003).

- 1107 59. Poser, I. *et al.* BAC TransgeneOmics: A high-throughput method for exploration of protein  
1108 function in mammals. *Nat. Methods* **5**, 409–415 (2008).
- 1109 60. Hein, M. Y. *et al.* A Human Interactome in Three Quantitative Dimensions Organized by  
1110 Stoichiometries and Abundances. *Cell* **163**, 712–723 (2015).
- 1111 61. Cheeseman, I. M. & Desai, A. A combined approach for the localization and tandem affinity  
1112 purification of protein complexes from metazoans. *Sci. STKE* **2005**, (2005).
- 1113 62. Reinhardt, P. *et al.* Genetic correction of a *lrrk2* mutation in human iPSCs links parkinsonian  
1114 neurodegeneration to ERK-dependent changes in gene expression. *Cell Stem Cell* **12**, 354–367  
1115 (2013).
- 1116 63. Kilpinen, H. *et al.* Common genetic variation drives molecular heterogeneity in human iPSCs.  
1117 *Nature* **546**, 370–375 (2017).
- 1118 64. Japtok, J. *et al.* Stepwise acquirement of hallmark neuropathology in FUS-ALS iPSC models  
1119 depends on mutation type and neuronal aging. *Neurobiol. Dis.* **82**, 420–429 (2015).
- 1120 65. Higelin, J. *et al.* FUS mislocalization and vulnerability to DNA damage in ALS patients derived  
1121 hiPSCs and aging motoneurons. *Front. Cell. Neurosci.* **10**, 290 (2016).
- 1122 66. Bellmann, J. *et al.* A customizable microfluidic platform for medium-throughput modeling of  
1123 neuromuscular circuits. *Biomaterials* **225**, 119537 (2019).
- 1124 67. Nijssen, J., Aguila, J., Hoogstraaten, R., Kee, N. & Hedlund, E. Axon-Seq Decodes the Motor  
1125 Axon Transcriptome and Its Modulation in Response to ALS. *Stem Cell Reports* **11**, 1565–1578  
1126 (2018).
- 1127 68. Pal, A. *et al.* High content organelle trafficking enables disease state profiling as powerful tool  
1128 for disease modelling. *Sci. Data* **2018 51 5**, 1–15 (2018).
- 1129 69. Kreiter, N. *et al.* Age-dependent neurodegeneration and organelle transport deficiencies in  
1130 mutant TDP43 patient-derived neurons are independent of TDP43 aggregation. *Neurobiol.*  
1131 *Dis.* **115**, 167–181 (2018).
- 1132 70. McQuin, C. *et al.* CellProfiler 3.0: Next-generation image processing for biology. *PLoS Biol.* **16**,  
1133 e2005970 (2018).
- 1134 71. Dushek, O. *et al.* Antigen potency and maximal efficacy reveal a mechanism of efficient T cell  
1135 activation. *Sci. Signal.* **4**, (2011).
- 1136 72. Oerter, K. E., Munson, P. J., McBride, W. O. & Rodbard, D. Computerized estimation of size of  
1137 nucleic acid fragments using the four-parameter logistic model. *Anal. Biochem.* **189**, 235–243  
1138 (1990).
- 1139 73. Mittasch, M. *et al.* Non-invasive perturbations of intracellular flow reveal physical principles  
1140 of cell organization. *Nat. Cell Biol.* **2018 203 20**, 344–351 (2018).
- 1141 74. Burke, K. A., Janke, A. M., Rhine, C. L. & Fawzi, N. L. Residue-by-Residue View of In Vitro FUS  
1142 Granules that Bind the C-Terminal Domain of RNA Polymerase II. *Mol. Cell* **60**, 231–241  
1143 (2015).
- 1144 75. Wider, G. & Dreier, L. Measuring protein concentrations by NMR spectroscopy. *J. Am. Chem.*  
1145 *Soc.* **128**, 2571–2576 (2006).
- 1146 76. Baldwin, A. J. & Kay, L. E. NMR spectroscopy brings invisible protein states into focus. *Nature*  
1147 *Chemical Biology* **5**, 808–814 (2009).

- 1148 77. Boczek, E. E. *et al.* HspB8 prevents aberrant phase transitions of FUS by chaperoning its  
1149 folded RNA binding domain. *Elife* **10**, (2021).
- 1150 78. Lechler, M. C. & David, D. C. More stressed out with age? Check your RNA granule  
1151 aggregation. *Prion* **11**, 313–322 (2017).
- 1152 79. Anderson, E. N. *et al.* Traumatic injury induces stress granule formation and enhances motor  
1153 dysfunctions in ALS/FTD models. *Hum. Mol. Genet.* **27**, 1366–1381 (2018).
- 1154 80. Ritson, G. P. *et al.* TDP-43 mediates degeneration in a novel *Drosophila* model of disease  
1155 caused by mutations in VCP/p97. *J. Neurosci.* **30**, 7729–7739 (2010).
- 1156 81. Brand, A. H. & Perrimon, N. Targeted gene expression as a means of altering cell fates and  
1157 generating dominant phenotypes. *Development* **118**, 401–415 (1993).
- 1158 82. Smith, R. & Taylor, J. P. Dissection and imaging of active zones in the *drosophila*  
1159 neuromuscular junction. *J. Vis. Exp.* e2676 (2011). doi:10.3791/2676
- 1160 83. Melamed, Z. *et al.* Premature polyadenylation-mediated loss of stathmin-2 is a hallmark of  
1161 TDP-43-dependent neurodegeneration. *Nat. Neurosci.* **22**, 180–190 (2019).
- 1162 84. Selkrig, J. *et al.* SARS-CoV-2 infection remodels the host protein thermal stability landscape.  
1163 *Mol. Syst. Biol.* **17**, e10188 (2021).
- 1164 85. Ritchie, M. E. *et al.* Limma powers differential expression analyses for RNA-sequencing and  
1165 microarray studies. *Nucleic Acids Res.* **43**, e47 (2015).
- 1166 86. Strimmer, K. fdrtool: A versatile R package for estimating local and tail area-based false  
1167 discovery rates. *Bioinformatics* **24**, 1461–1462 (2008).
- 1168 87. Oates, M. E. *et al.* D2P2: Database of disordered protein predictions. *Nucleic Acids Res.* **41**,  
1169 D508–D516 (2013).
- 1170 88. Vacic, V., Uversky, V. N., Dunker, A. K. & Lonardi, S. Composition Profiler: A tool for discovery  
1171 and visualization of amino acid composition differences. *BMC Bioinformatics* **8**, 1–7 (2007).
- 1172 89. Perez-Riverol, Y. *et al.* The PRIDE database resources in 2022: a hub for mass spectrometry-  
1173 based proteomics evidences. *Nucleic Acids Res.* **50**, D543–D552 (2022).
- 1174

## A HeLa FUS<sup>WT</sup> GFP cells

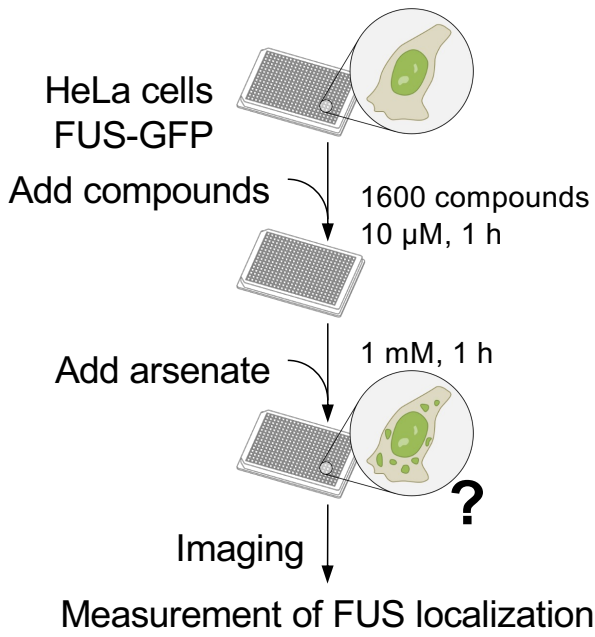

## B HeLa FUS<sup>WT</sup> GFP cells

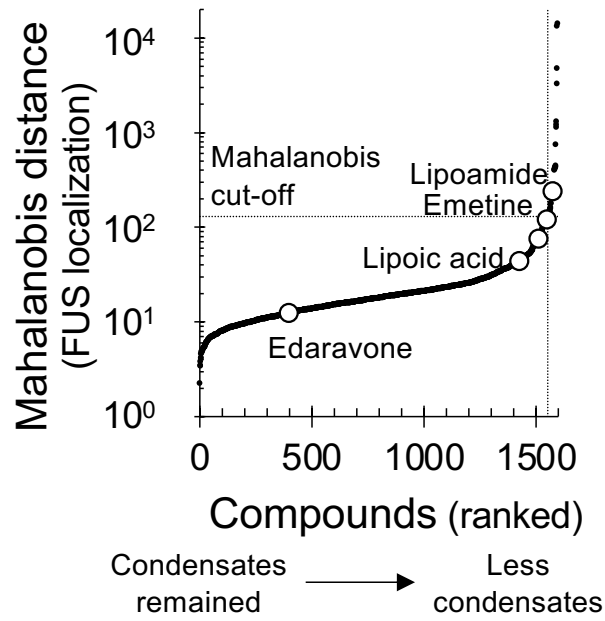

## C HeLa FUS<sup>WT</sup> GFP cells

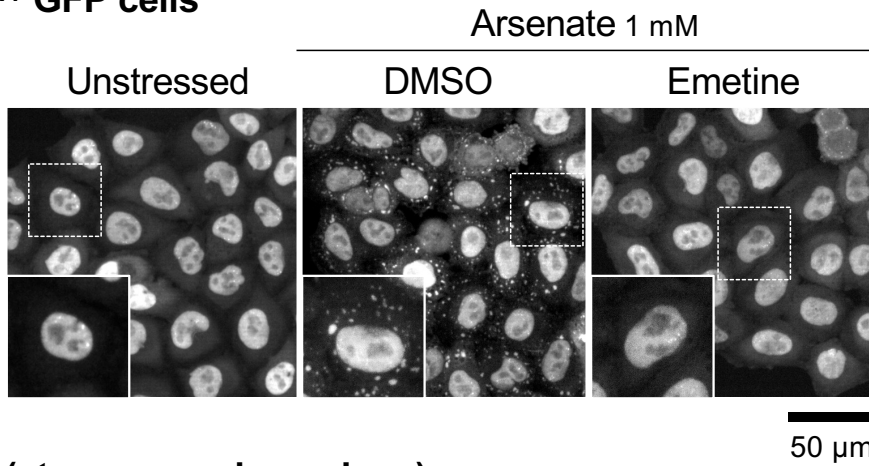

## D HeLa cells (stress granule markers)

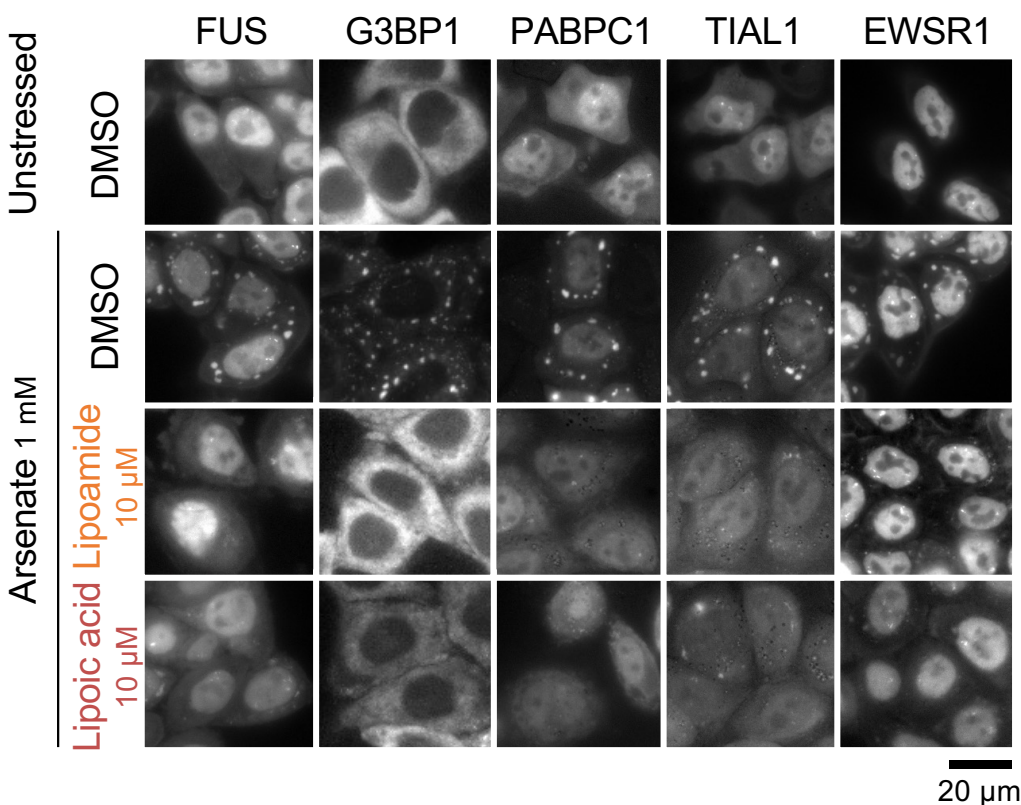

## 75 Figures

### 76 **Fig. 1. Lipoamide reduces cytoplasmic condensation of stress granule proteins**

77 **A**, Workflow for screening small molecules for effects on FUS-GFP localisation in HeLa cells *ex vivo*. **B**, Ranked  
78 Mahalanobis distances for all 1600 compounds screened (mean from six fields of view) where high values indicate  
79 more compound effect. Several automated measures of FUS localisation were combined into a single Mahalanobis  
80 distance score; the largest contributors were cytoplasmic FUS condensate number and area (see the method section).  
81 A cut-off of 130 was used to select 47 compounds for further analysis. **C**, The sub-cellular localisation of FUS-GFP in  
82 unstressed HeLa cells, stressed cells with compound solvent (DMSO) negative control, and with the positive control  
83 emetine. Stress causes nuclear export of FUS and formation of stress granules (cytoplasmic liquid FUS-containing  
84 condensates). Insets, magnified images in the boxed areas. **D**, Representative images of HeLa cells expressing GFP-  
85 tagged stress granule markers (G3BP1, PABPC1, TIAL1, or EWSR1) from 3 independent experiments. The cells were  
86 pre-treated with 10  $\mu$ M lipoamide or lipoic acid (with DMSO solvent control) for 1 h followed by 1 mM arsenate for 1  
87 h, or DMSO without arsenate.

88

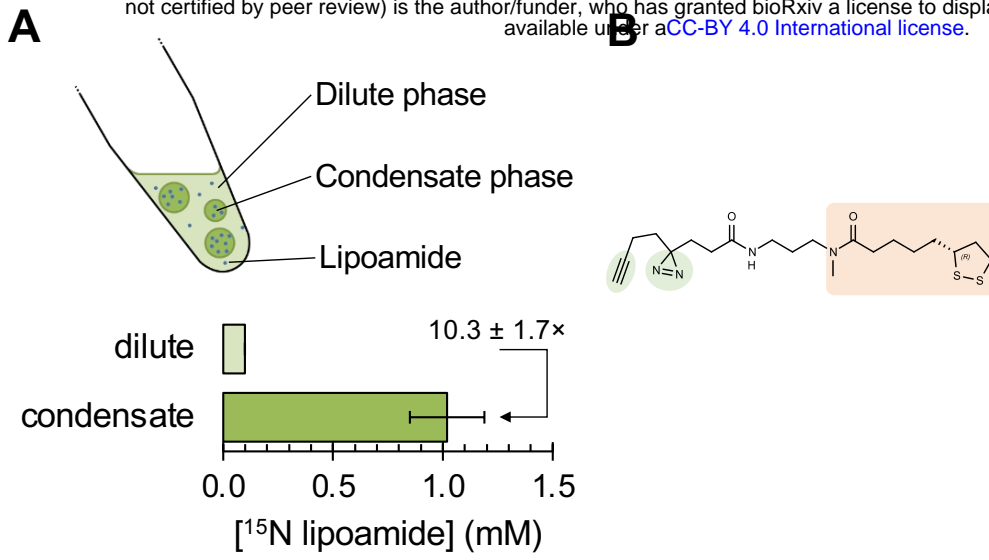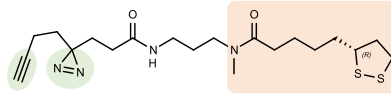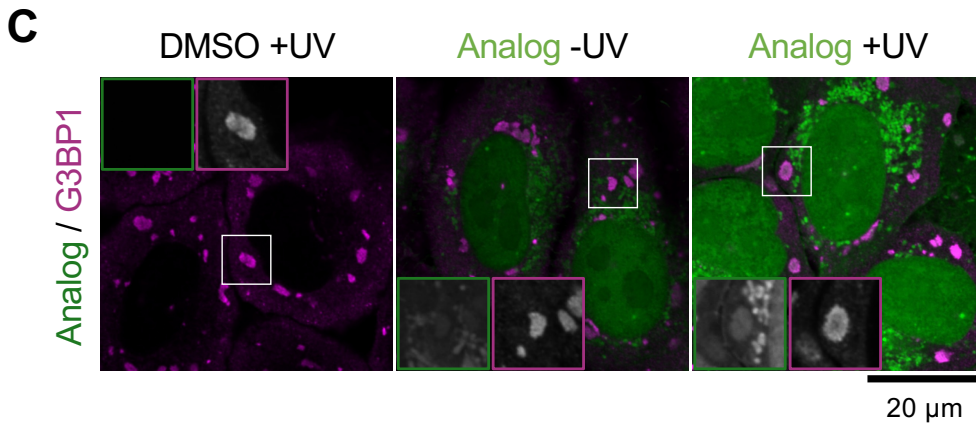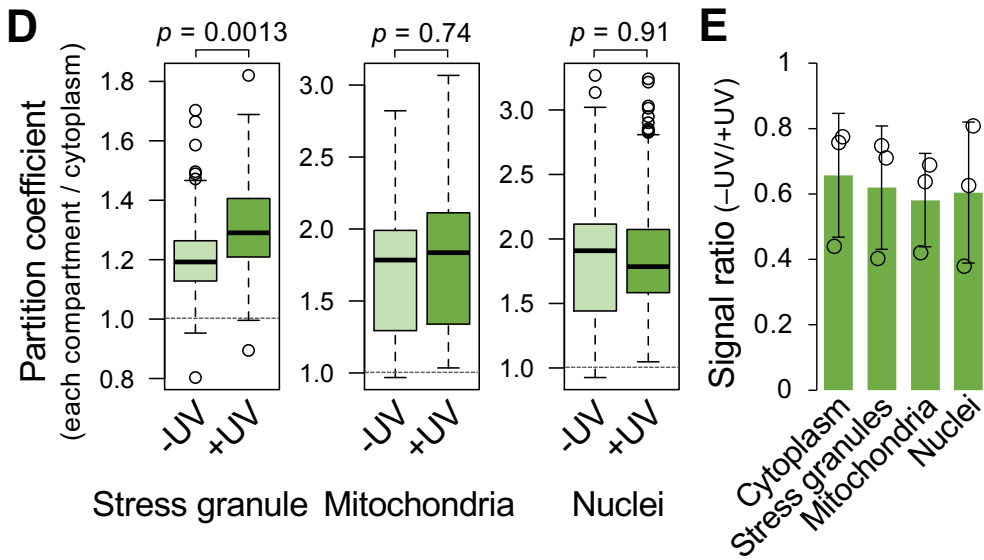



89

90 **Fig. 2. Lipoamide partitions into compartments of stress granule proteins**

91 **A**, Top, schema of lipoamide partitioning into FUS condensates *in vitro*. Bottom, mean  $\pm$  s.e.m. of concentration of  
92 racemic [15N]-lipoamide in the condensate and the surrounding dilute phase of FUS-GFP *in vitro*, quantified using  
93  $^{15}\text{N}(^1\text{H})$  NMR from 4 independent experiments. **B**, Chemical structure of the click-crosslink lipoamide analog, with the  
94 lipoamide backbone (orange) and the groups for UV cross linking and click reaction (green). **C**, Representative images  
95 of HeLa cells treated with 3 mM arsenate for 1 h followed by 30  $\mu\text{M}$  of the analogue or the control DMSO in the  
96 presence of arsenate for additional 30 min before either irradiated with UV for cross-linking (+UV) or not (-UV), fixed,  
97 immunostained, and subjected to the click reaction with the fluorophore (for all conditions). Stress granules were  
98 labelled with G3BP1. Insets, stress granules in the boxed areas (analogue and G3BP1 boxed in green and magenta,  
99 respectively). **D**, Boxplot of the partition coefficient of the analogue into stress granules, mitochondria, or nuclei  
00 relative to the cytoplasm (excluding stress granules and mitochondria) based on signal intensity of the fluorophore.  
01 Boxplot shows median (bold bar), 25<sup>th</sup> and 75<sup>th</sup> percentiles, and outliers (open dots); whiskers extend to the most  
02 extreme values.  $n = 344$  (-UV) and 345 (+UV) cells from 3 experiments.  $p$  values by unpaired  $t$ -test. **E**, Mean  $\pm$  s.d. of  
03 signal intensity ratio (-UV against +UV) of the fluorophore at indicated subcellular compartments.

04

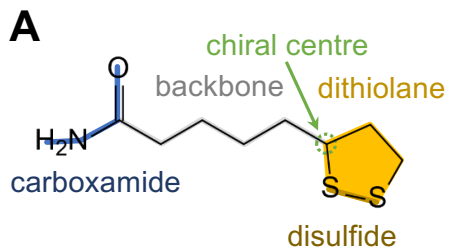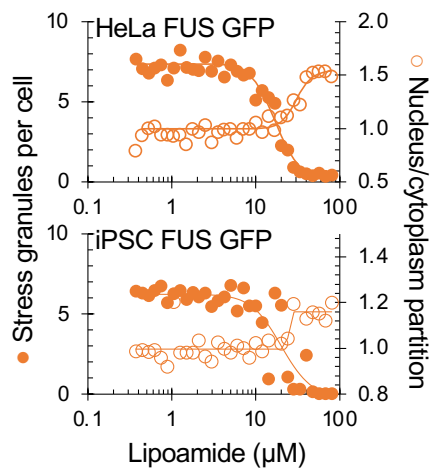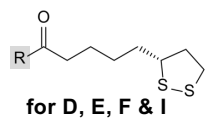

**D secondary amides**

| R = | $EC_{50}$ ( $\mu\text{M}$ ) |
|-----|-----------------------------|
|     | 9.36                        |
|     | 13.3                        |
|     | 19.5                        |

**B stereoisomer**

| Lipoamide   | $EC_{50}$ ( $\mu\text{M}$ ) | Lipoic acid | $EC_{50}$ ( $\mu\text{M}$ ) |
|-------------|-----------------------------|-------------|-----------------------------|
| Racemic-(±) | 13.9                        | 17.0        |                             |
| R-(+)       | 12.1                        | ~30         |                             |
| S-(-)       | 14.0                        | 23.1        |                             |

**C amide methylation**

|                 | $EC_{50}$ ( $\mu\text{M}$ ) |
|-----------------|-----------------------------|
| R-(+)-lipoamide | 12.1                        |
| Monomethylated  | 3.48                        |
| Dimethylated    | >30                         |

**E**

| R = | $EC_{50}$ ( $\mu\text{M}$ ) |
|-----|-----------------------------|
|     | 2.12                        |
|     | 2.23                        |
|     | 2.28                        |
|     | 2.43                        |
|     | 2.59                        |
|     | 2.94                        |
|     | 2.94                        |

**F**

| R = | $EC_{50}$ ( $\mu\text{M}$ ) |
|-----|-----------------------------|
|     | 7.72                        |
|     | 28.4                        |
|     | 5.12                        |
|     | 2.39                        |

**G backbone length**

|  | $EC_{50}$ ( $\mu\text{M}$ ) |
|--|-----------------------------|
|  | 13.9                        |
|  | 3.48                        |
|  | 3.58                        |

**H carboxamide replacement**

|  | $EC_{50}$ ( $\mu\text{M}$ ) |
|--|-----------------------------|
|  | 1.07                        |

**I most potent**

| R = | $EC_{50}$ ( $\mu\text{M}$ ) |
|-----|-----------------------------|
|     | 1.20                        |
|     | 1.30                        |
|     | 1.30                        |
|     | 1.41                        |
|     | 1.44                        |
|     | 1.63                        |
|     | 1.72                        |
|     | 1.85                        |
|     | 1.93                        |
|     | 2.01                        |

**J dithiolane modifications**

|  | $EC_{50}$ ( $\mu\text{M}$ ) |
|--|-----------------------------|
|  | 19.8                        |
|  | 14.9                        |
|  | >30                         |
|  | >30                         |
|  | >30                         |

05

06 **Fig. 3. Structure-activity relationship shows lipoamide activity is dependent on the dithiol but is non-enzymatic**

07 **A**, Top, schema of the chemical structure of lipoamide (racemic) with highlighting its features. Bottom, lipoamide dose  
08 response using HeLa and iPS cells, showing FUS-GFP condensate (stress granule) number (solid circles, left axis) and  
09 nuclear/cytoplasmic signal ratio (open circles, right axis) with 1 h pre-treatment with lipoamide followed by 1 h  
10 arsenate stress under continued lipoamide treatment. **B–J**, Chemical structures and  $EC_{50}$  ( $\mu\text{M}$ ) of lipoamide and its  
11 derivatives, using HeLa cells and the treatment scheme in A.  $EC_{50}$  was calculated from dose response curves (details in  
12 the method section), and each concentration of each compound was tested in duplicated wells ( $n = 1750\text{--}2650$  cells  
13 per well) with 2 independent experiments. **B**, Enantiomers of lipoamide and lipoic acid. **C**, Comparison of mono- and  
14 di-methylated lipoamide. **D–F**, Additional carboxamide analogs of lipoamide. **G**, Modifications of the linker length  
15 between the carboxamide and the dithiolane ring of lipoamide. **H**, Substitution of the carboxamide of lipoamide. **I**,  
16 Carboxamide analogs of 6-amino-3-substituted-4-quinazolinones and five-membered aminoheterocyclic amides. **J**,  
17 Modifications of the dithiolane ring of lipoamide, lipoic acid or similar compounds.

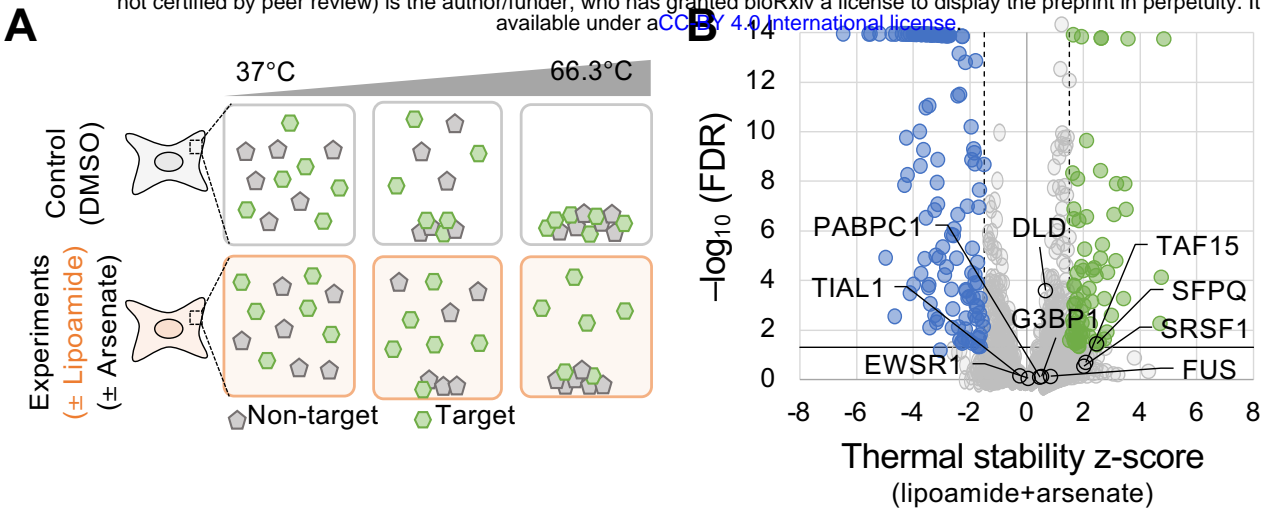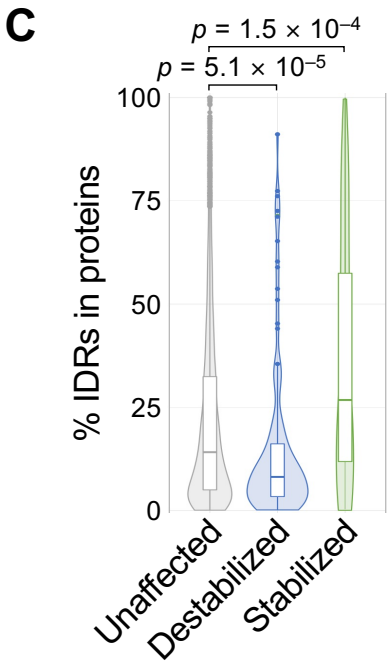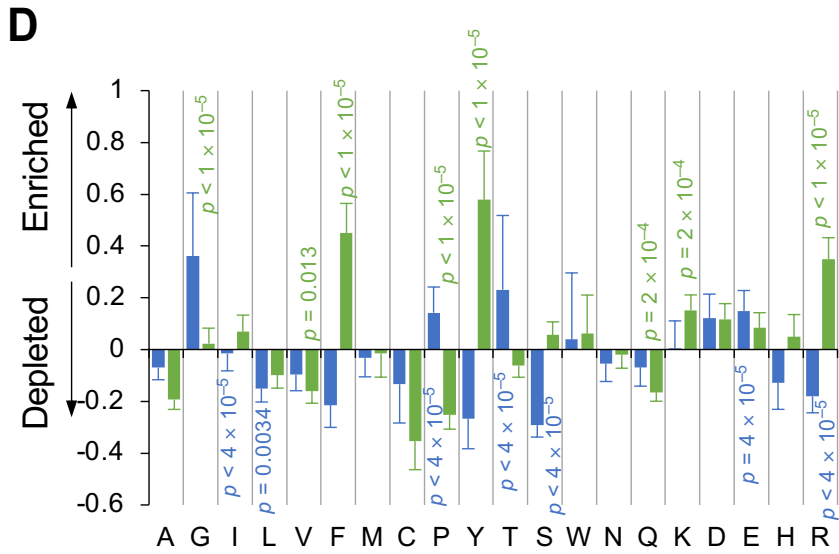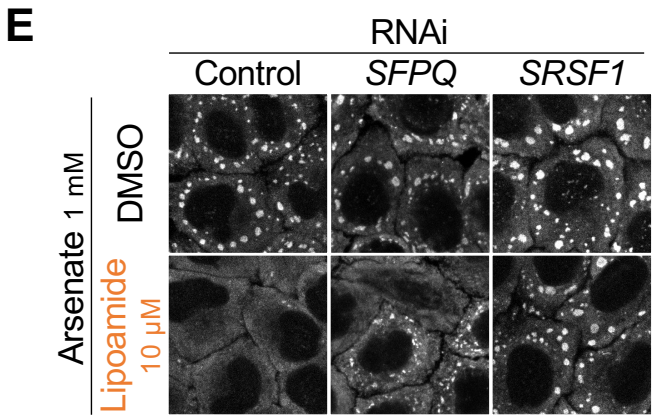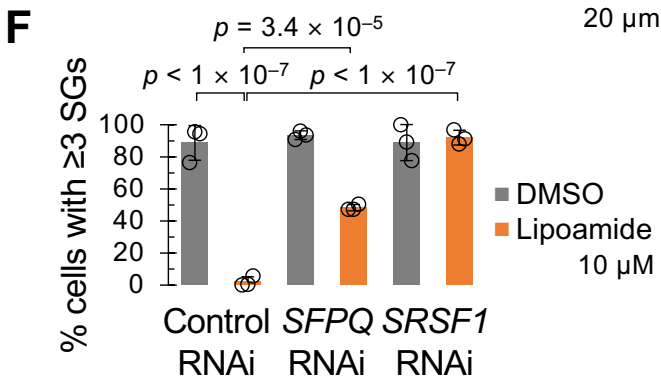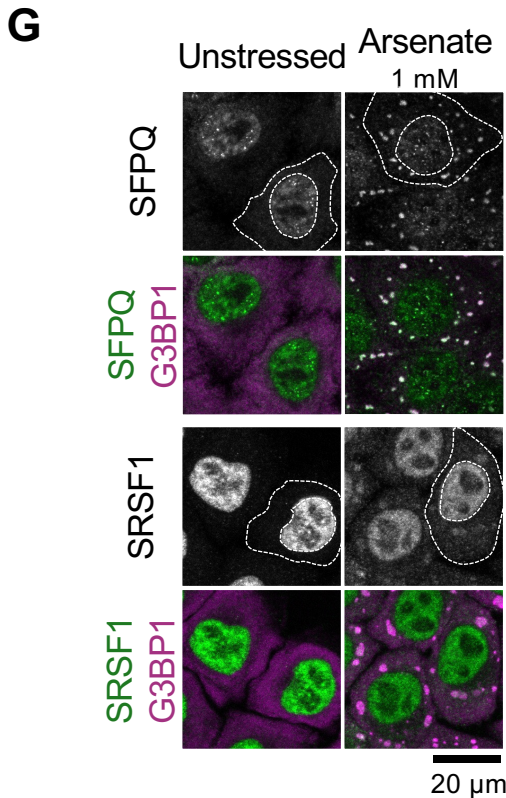

18

19 **Fig. 4. Lipoamide interacts with disordered proteins in cells**

20 **A**, Schema of TPP to see the effect of lipoamide treatment on protein thermal stability. In our TPP, HeLa cells treated  
21 with 100  $\mu$ M lipoamide and/or 1 mM arsenate were heated to ten different temperatures. Heating causes protein  
22 denaturing and precipitation, and lipoamide could prevent precipitation of the target proteins. The soluble protein  
23 amount was quantified by mass spectrometry and normalized with the result of non-stressed 0.1% DMSO-treated  
24 samples (control). **B**, Volcano plot of z-scores (mean from 3 individual experiments) and FDRs of protein thermal  
25 stability in HeLa cells treated with lipoamide and arsenate. A larger z-score indicates more thermal stabilization. Black  
26 broken and solid lines indicate cutoffs of z-score ( $\pm 1.5$ ) and FDR ( $< 0.05$ ), respectively, used to classify stabilized (green)  
27 and destabilized (blue) proteins in F and G. The positions of DLD, SFPQ, SRSF1, and several stress granule proteins are  
28 indicated. **C**, Violin and box plots showing proportions of IDRs in each protein from cells treated with both lipoamide  
29 and arsenate. The proteins were categorized into stabilised ( $z > 1.5$ , FDR  $< 0.05$ ; 70 proteins), destabilised ( $z < -1.5$ ,  
30 FDR  $< 0.05$ ; 144 proteins), and unaffected (the others detected; 5811 proteins). Boxplots show median (bold bar), 25<sup>th</sup>  
31 and 75<sup>th</sup> percentiles, and outliers (closed dots); whiskers extend to the most extreme values. *p* values by a Wilcoxon  
32 signed-rank test followed by Holm's test. **D**, Enrichment ( $> 0$ ) or depletion ( $< 0$ ) of each amino acid in IDRs of the  
33 stabilized (green) and destabilized (blue) proteins in cells treated with both lipoamide and arsenate, in comparison to  
34 IDRs of all the detected proteins as background. *p* values by unpaired *t*-test followed by Bonferroni's test. **E**,  
35 Representative images of HeLa cells from  $>3$  independent experiments, depleted of SFPQ or SRSF1, treated with 10  $\mu$ M  
36 lipoamide or 0.1% DMSO for 1 h followed by 1 mM arsenate for 1 h in the presence of lipoamide. Stress granules were  
37 labelled with G3BP1. **F**, Mean  $\pm$  s.d. of percentage of stressed HeLa cells with  $\geq 3$  G3BP1-positive stress granules (SGs).  
38  $n = 292$ – $615$  cells from 3 independent experiments. Dots indicate means of each experiment. *p* values by Tukey's test.  
39 **G**, Representative images of HeLa cells from  $>3$  independent experiments, treated with 1 mM arsenate for 1 h and  
40 subjected to immunostaining with indicated antibodies. Outer and inner broken lines indicate edges of the cytoplasm  
41 and nucleus of one cell each condition, respectively. Note that the SFPQ and SRSF1 signals were diminished by  
42 individual RNAis.

43

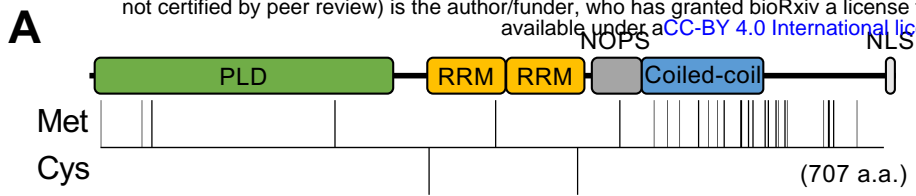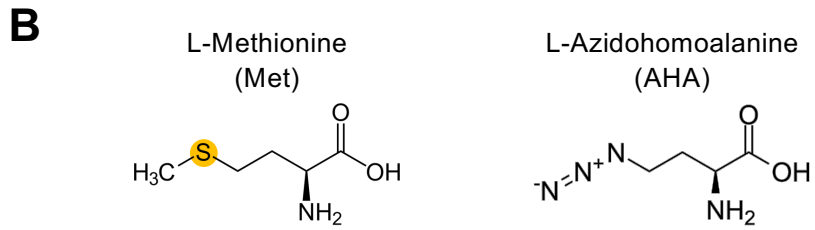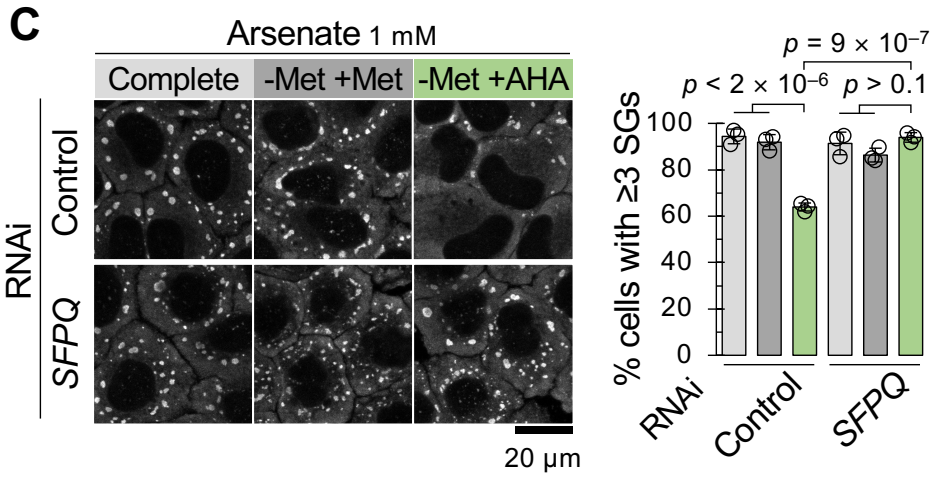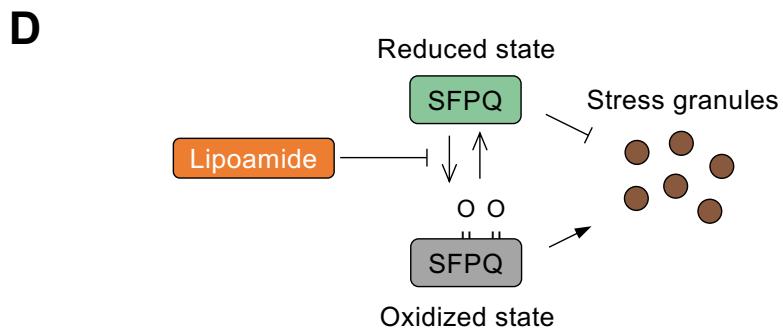

44 **Fig. 5. SFPQ redox state may mediate the lipoamide activity**

45 **A**, Schema of distributions of methionine (Met; 28 residues) and cysteine (Cys; 2) residues in human SFPQ. PLD, prion-  
46 like domain; RRM, RNA recognition motif; NOPS, NonA/paraspeckle domain; NLS, nuclear localizing signal. **B**, Chemical  
47 structures of Met and its non-natural analogue azidohomoalanine (AHA). **C**, Left, representative images of HeLa cells  
48 subjected to indicated RNAis, cultured in complete medium (light grey) or Met-free medium supplemented with 1 mM  
49 of Met (dark grey) or AHA (green) for 2 h followed by 1 mM arsenate for 1 h (experimental schema in Fig. S6E). Stress  
50 granules (SGs) were labelled with G3BP1. Right, mean  $\pm$  s.d. of percentage of stressed HeLa cells with  $\geq 3$  G3BP1-  
51 positive SGs.  $n = 325\text{--}407$  cells from 3 independent experiments.  $p$  values by Tukey's test. **D**, Schema of SFPQ as a  
52 redox sensor to modulate stress granule condensation.

53

**A**

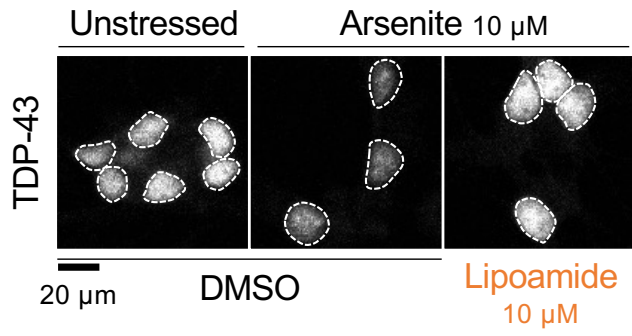

**B**

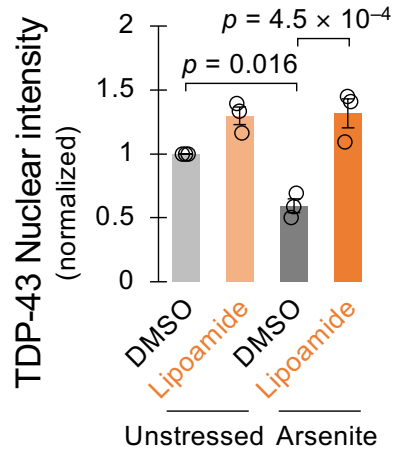

**E**

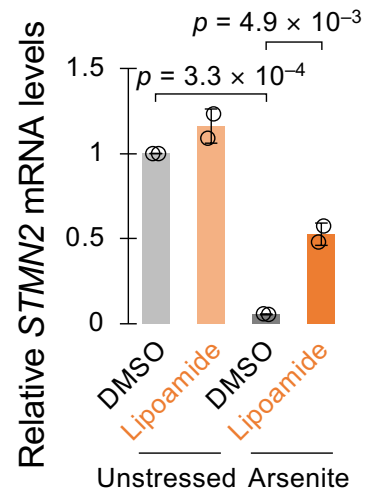

**C**

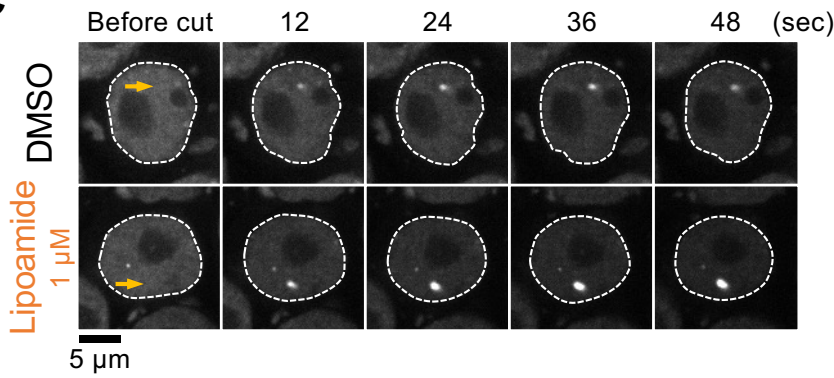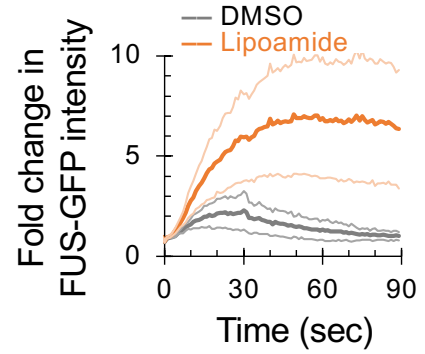

**D**

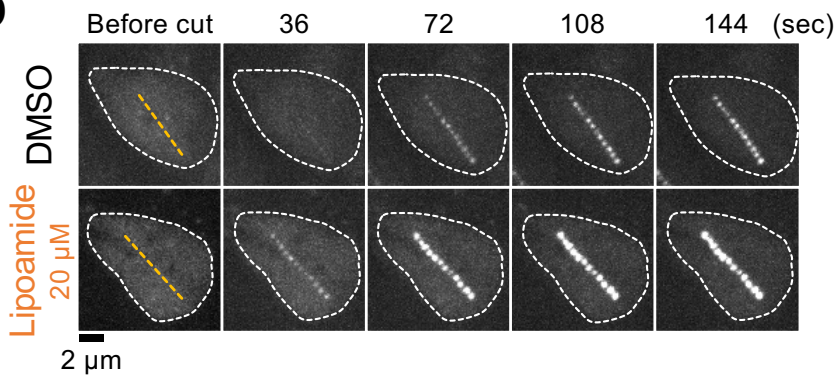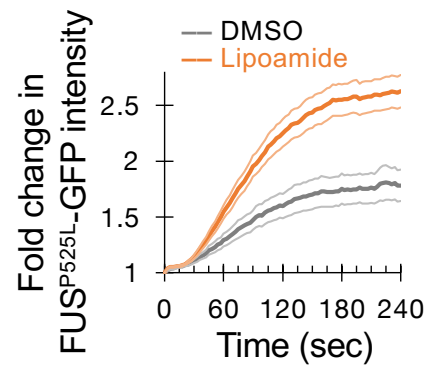



54

55 **Fig. 6. Lipoamide improves nuclear localization of FUS and TDP-43**

56 **A**, Representative images of iPSC-derived MNs from 3 independent experiments, treated with 0.1% DMSO or 10  $\mu$ M  
57 lipoamide for 1 day followed by 10  $\mu$ M arsenite for 5 days in the presence or absence of lipoamide, and labelled with  
58 TDP-43. Broken line, outline of nuclei. **B**, mean  $\pm$  s.e.m of nuclear TDP-43 levels normalized to those of unstressed  
59 DMSO-treated MNs (control).  $n = 417$ – $1741$  cells from 3 independent experiments.  $p$ -values, Tukey's test. **C**, (Left)  
60 images showing recruitment of FUS-GFP to sites of UV laser-induced DNA damage (yellow arrow) in nuclei (outlined  
61 with broken lines) of iPS cells at indicated times after laser irradiation. Cells were subjected after 1 h treatment with  
62 lipoamide followed by 1 h arsenate stress. (Right) mean  $\pm$  s.d. of relative FUS-GFP signal intensity in response to DNA  
63 damage.  $n = 5$  (DMSO) and 7 (lipoamide) cells. **D**, (Left) images of nuclei (outlined with broken lines) of iPSC-derived  
64 MNs expressing FUS P525L-GFP from 3 independent experiments, cultured for 21 days and then treated with 0.02 %  
65 DMSO or 20  $\mu$ M lipoamide for 24 h, at indicated times after laser irradiation. Yellow lines indicate laser-irradiated sites.  
66 (Right) mean  $\pm$  s.e.m. of relative intensity of FUS-GFP at DNA damage sites after ablation.  $n = 14$  (DMSO) and 18  
67 (lipoamide) cells from 3 independent experiments. **E**, Mean  $\pm$  s.d. of relative STMN2 full length mRNA levels normalized  
68 to those of GAPDH from 2 independent experiments.  $P$ -values by Tukey's test. In B and E, MNs were treated as in A.

69

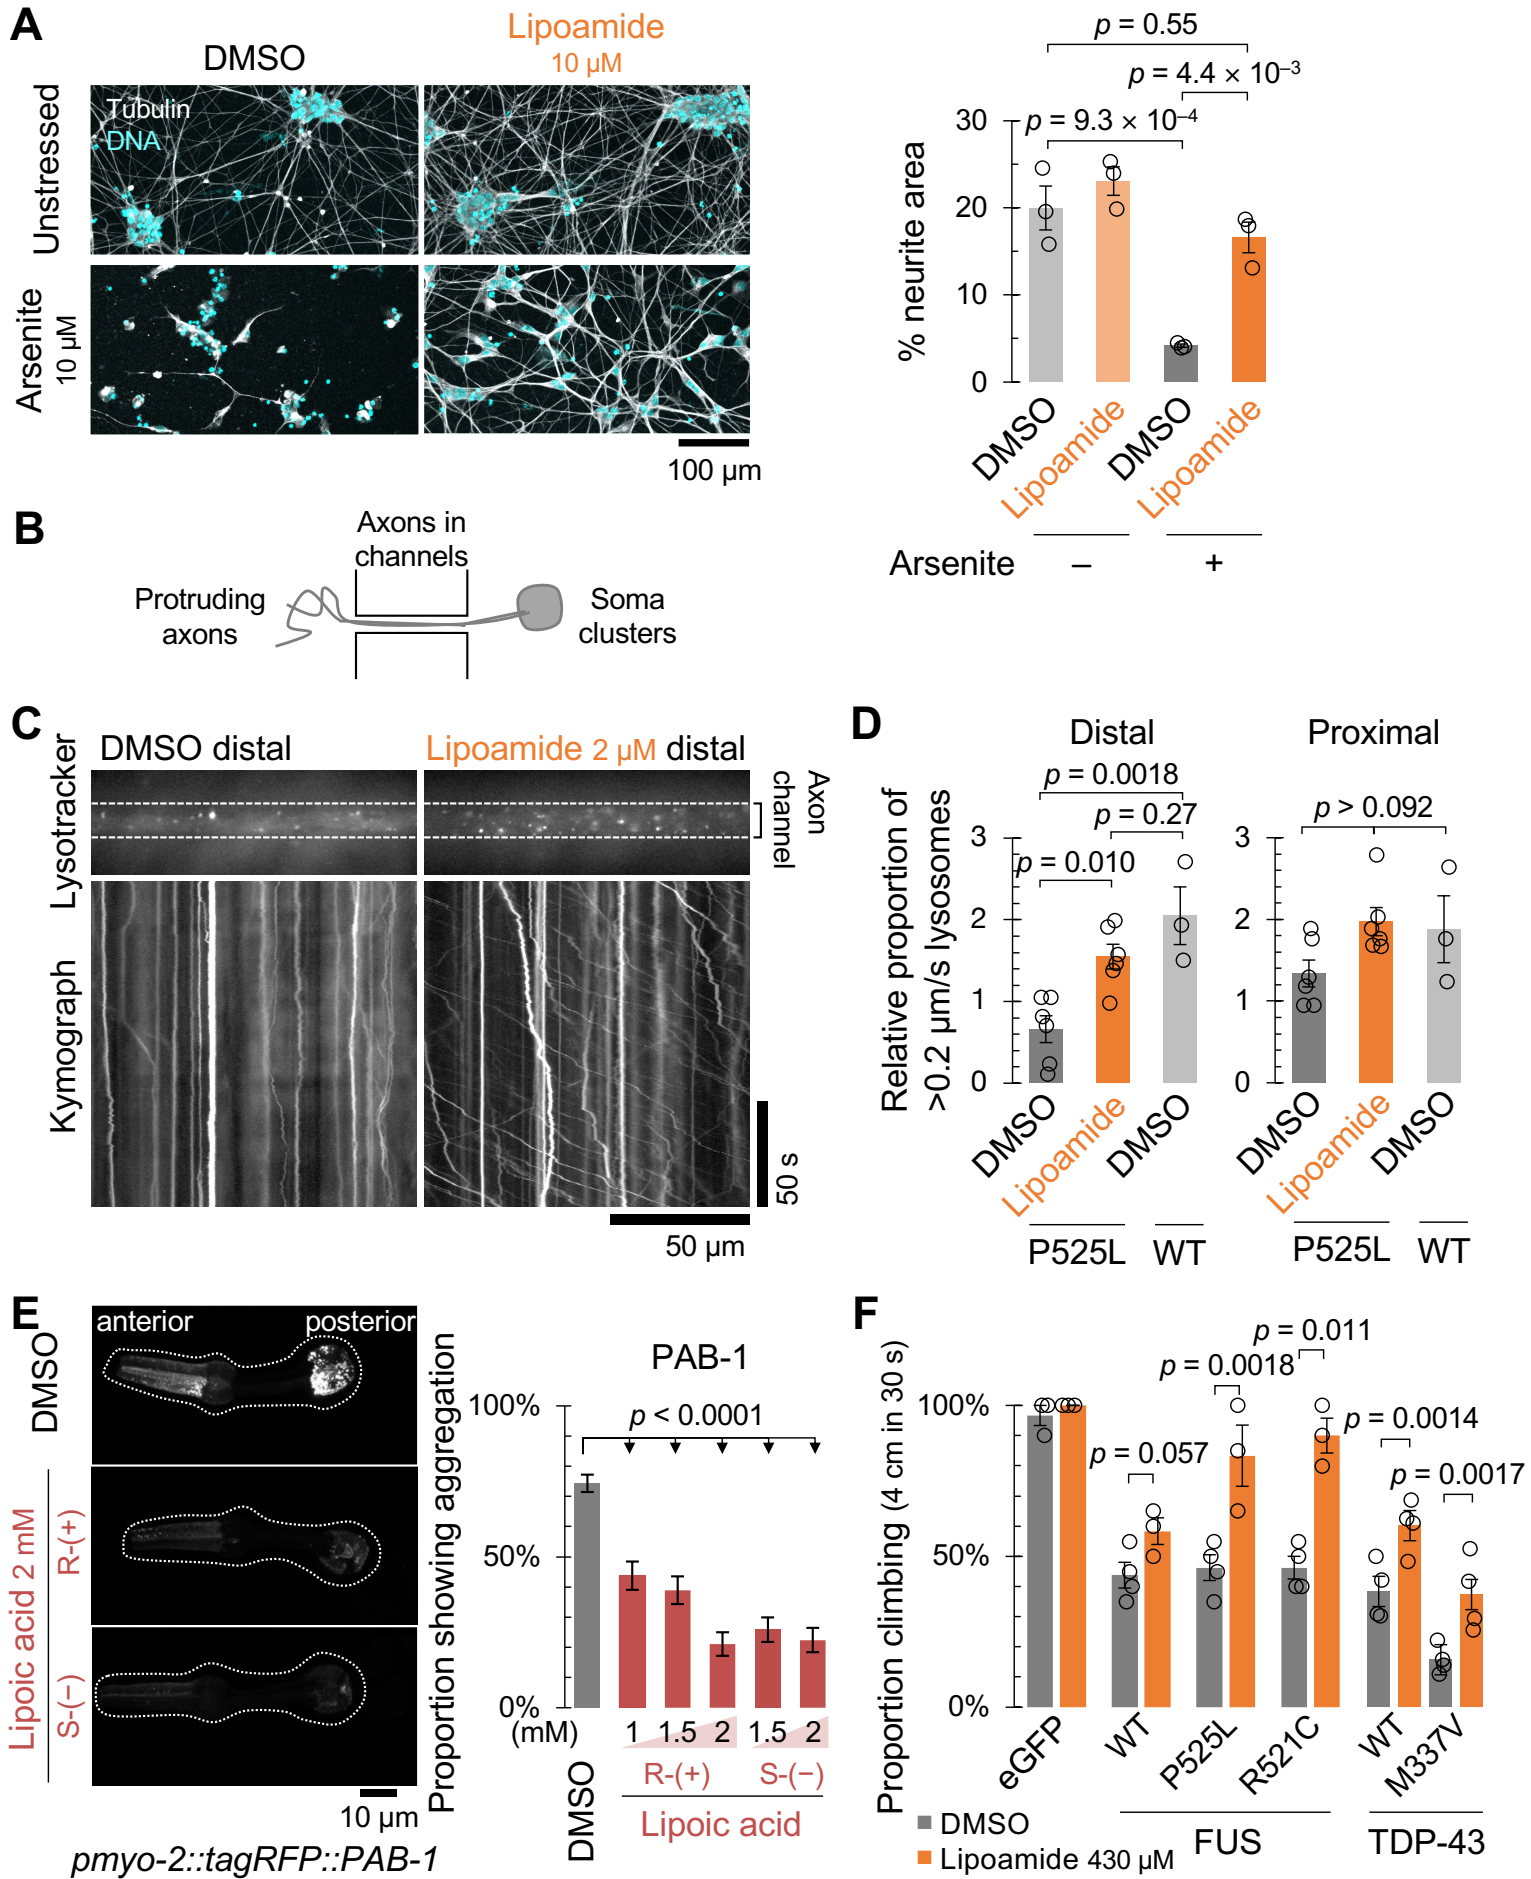

70

71 **Fig. 7. Lipoamide improves cellular fitness in ALS disease models of iPSC-derived motor neurons and animals**

72 **A**, (Left) representative images of iPSC-derived MNs treated as in Fig.5A. (Right) mean  $\pm$  s.e.m of percentage of neurite  
73 (tubulin-positive) area. 18 image fields from 3 independent experiments. *P*-values, Tukey's test. **B**, Schematic of neuron  
74 culture, showing the channels through which the axons grow from the soma on the right. **C**, Kymographs of lysosome  
75 movement in the distal portion of FUS P525L MN axons 3 days after treatment with compound solvent (DMSO) or 2  $\mu$ M  
76 lipoamide, visualized with lysotracker. **D**, mean  $\pm$  s.e.m. of relative proportion of lysotracker-labelled lysosomes moving  
77 with an average speed greater than 0.2  $\mu$ m/s following 3 days treatment with 2  $\mu$ M lipoamide or equivalent DMSO  
78 concentration solvent control for iPSC-derived MNs expressing either P525L or WT FUS, normalized to mean of  
79 proportion moving (proximal and distal) in the DMSO-treated P525L FUS MNs. 6 (P525L) or 3 (wild-type) biological  
80 replicates, analyzing 5 axon bundles per replicate. *p* values by Tukey's test. **E**, (Left) Representative images of the  
81 pharynx of worms expressing fluorescently tagged PAB-1 with or without lipoic acid treatment (2 mM). Broken lines,  
82 the edge of pharynges. (Right) Mean  $\pm$  s.e.m. of incidence of each protein aggregation in the pharyngeal muscles.  
83 Incidence of PAB-1 aggregation was scored from the proportion of animals with >10 aggregates. \*\*\**p* < 0.0001 by  
84 Fisher's exact test. *n* > 100 for each sample. **F**, Mean  $\pm$  s.e.m. of proportion of flies that climbed, fed with 0.1% DMSO  
85 (solvent control) or 430  $\mu$ M lipoamide. Human WT or ALS-linked mutants of FUS (left) or TDP-43 (right) were expressed  
86 in motor neurons. *p* values by unpaired *t*-test. *n* = 30–40 (FUS) and 130–202 (TDP-43) flies from 3 or 4 independent  
87 experiments.

88

## A *in vitro* proteins

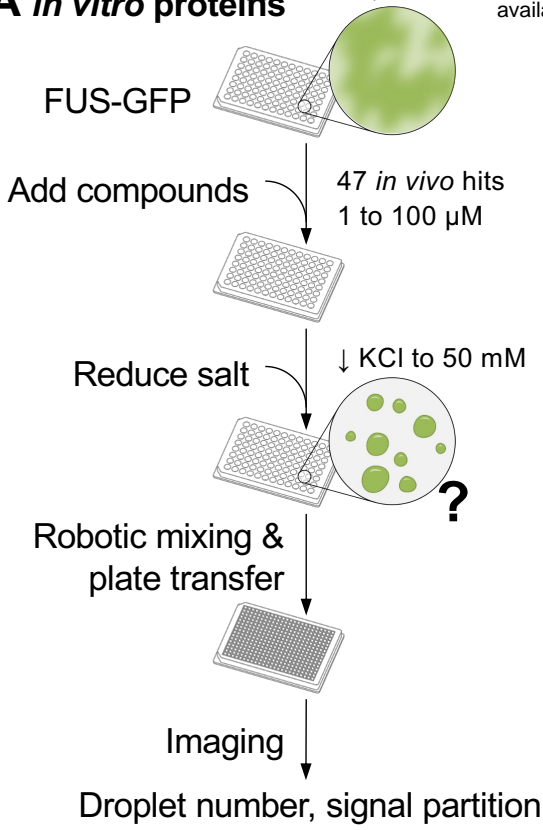

## B

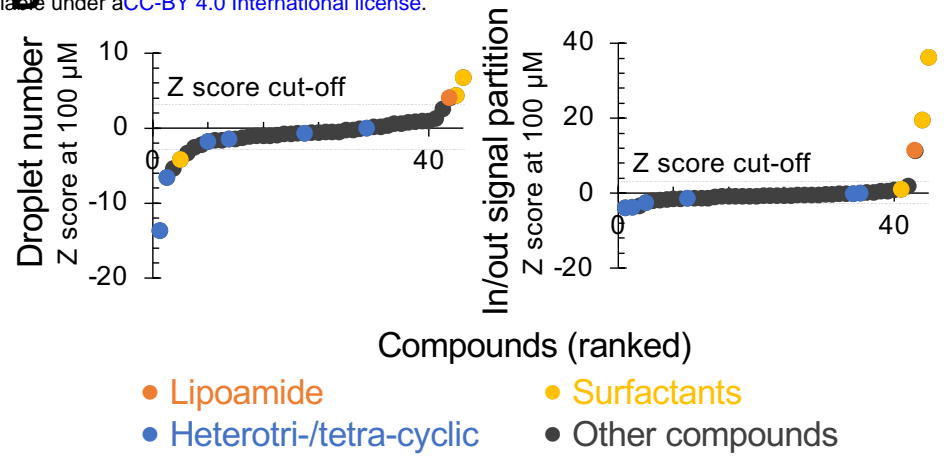

## C

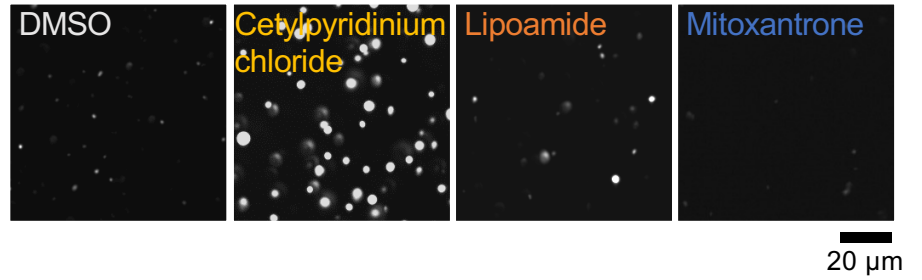

## D HeLa cells

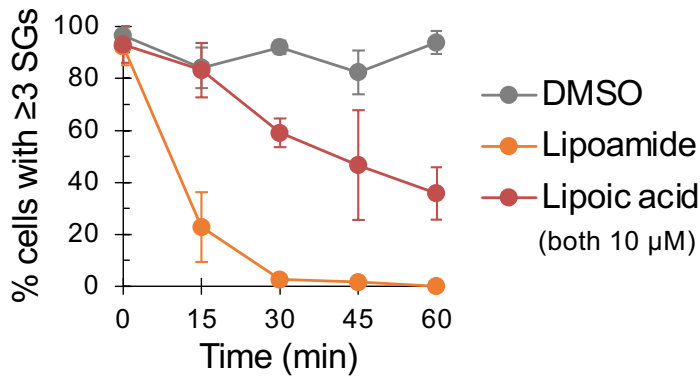

## E HeLa cells (other condensates)

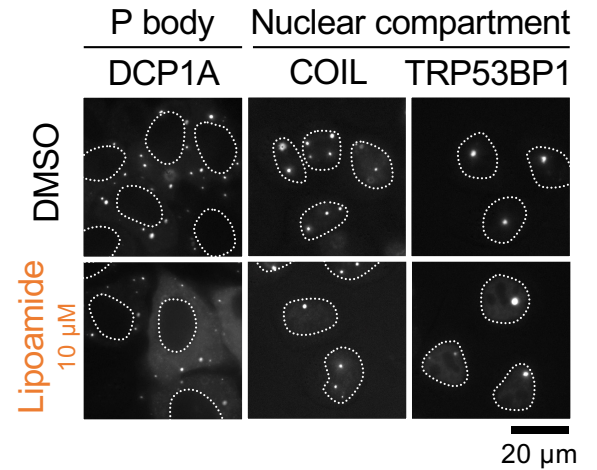

## F HeLa FUS WT-GFP cells (under different stresses)

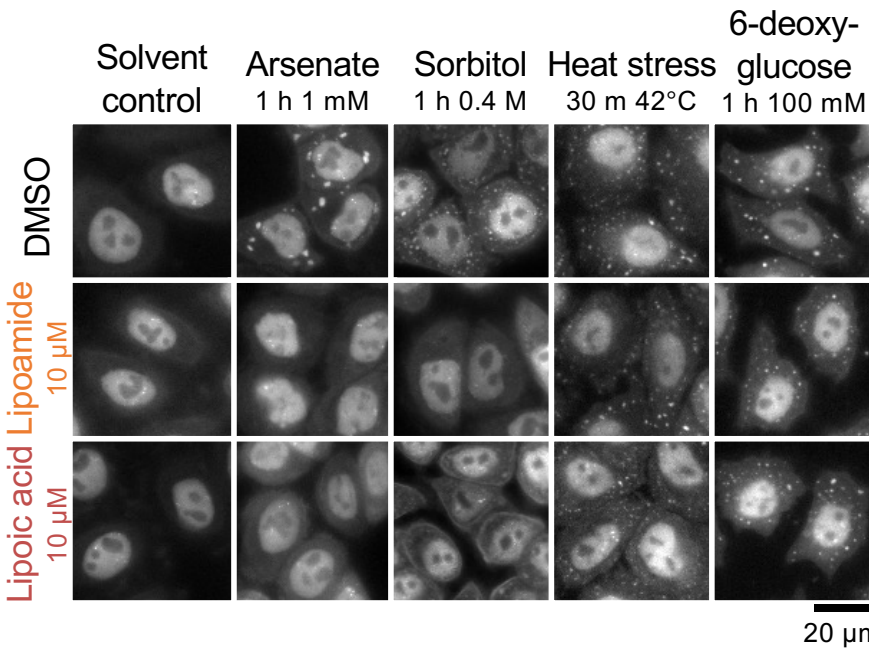

## G HeLa cells

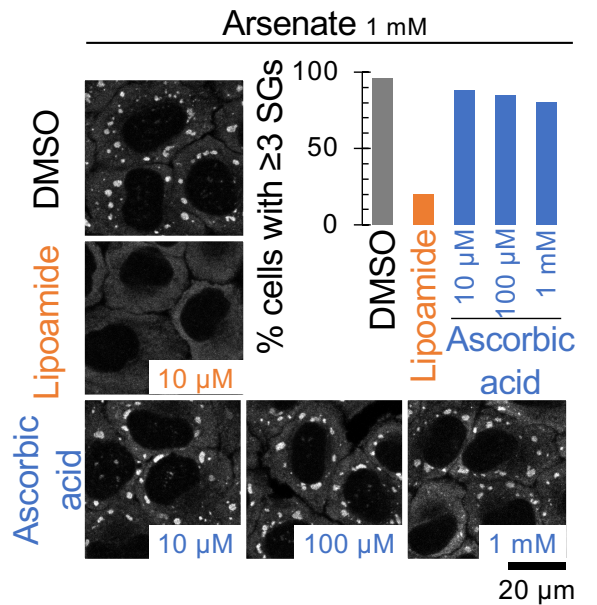

## 89 Supplemental figures

### 90 **Fig. S1. *In vitro* follow-up screening and lipoamide characterization in HeLa cells**

91 **A**, Workflow for screening small molecules for effects on FUS condensation of purified FUS-GFP *in vitro*. **B**, Ranked Z  
92 scores of change in condensate droplet number and signal partition into FUS-GFP droplets (formed under low salt  
93 conditions) where larger positive or negative values mean more compound effect. Scores were calculated at the  
94 maximum concentration at which the compound solvent (DMSO) negative control had no significant effect; 100  $\mu$ M.  
95 Lipoamide, surfactant and heterotri-/tetracyclic compounds are indicated by data point colour. **C**, Appearance of the  
96 droplets with compound solvent (DMSO) negative control or examples of compound classes: cetylpyridinium chloride  
97 (surfactant), lipoamide or mitoxantrone (heterotricyclic). Note the larger drops with cetylpyridinium chloride and  
98 lipoamide and the fewer smaller drops with mitoxantrone. **D**, Mean  $\pm$  s.d. of percentage of HeLa cells with  $\geq 3$  G3BP1-  
99 positive stress granules (SGs). Cells were treated with 1 mM arsenate for 1 h to induce SGs, followed by 10  $\mu$ M  
00 lipoamide, lipoic acid, or 0.1% DMSO (control) in the presence of arsenate for indicated minutes.  $n = 52$ – $248$  cells from  
01 3 independent experiments. **E**, Images of HeLa cells expressing GFP-tagged markers of other membrane-less organelle  
02 compartments subjected to 1 h treatment with 10  $\mu$ M lipoamide (or DMSO control). Where unclear, the position of  
03 nuclei is indicated with a broken outline. Lipoamide does not disrupt P bodies (DCP1A), Cajal bodies (COIL), or DNA  
04 damage foci (TRP53BP1). **F**, Images of HeLa cells expressing FUS-GFP subjected to different stresses – arsenate, sorbitol  
05 (osmotic), heat, or 6-deoxyglucose (glycolysis) – with concurrent treatment with 10  $\mu$ M lipoamide or lipoic acid. **G**,  
06 Representative images of HeLa cells treated with 1 mM arsenate for 1 h, followed by 0.1% DMSO (control), 10  $\mu$ M  
07 lipoamide, or indicated concentrations of ascorbic acid for 15 min. SGs were labelled with G3BP1.

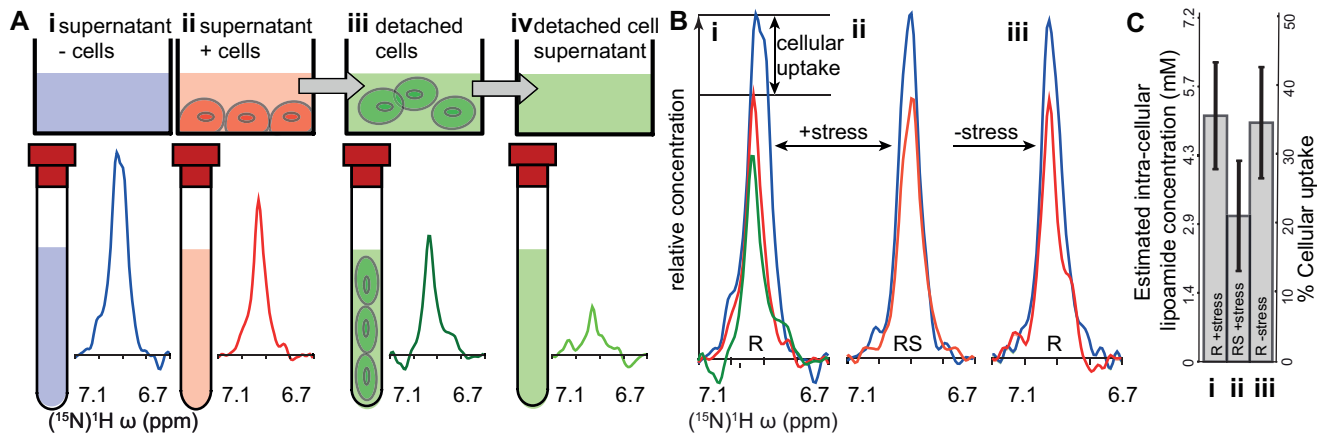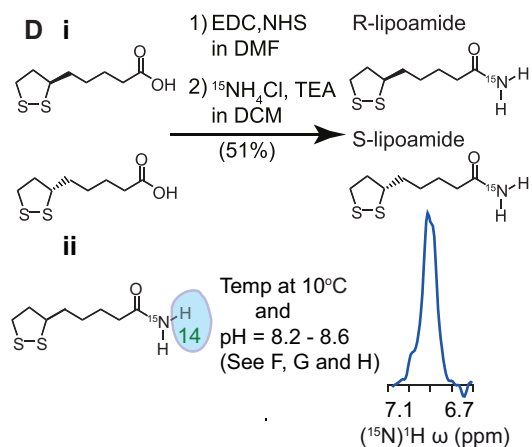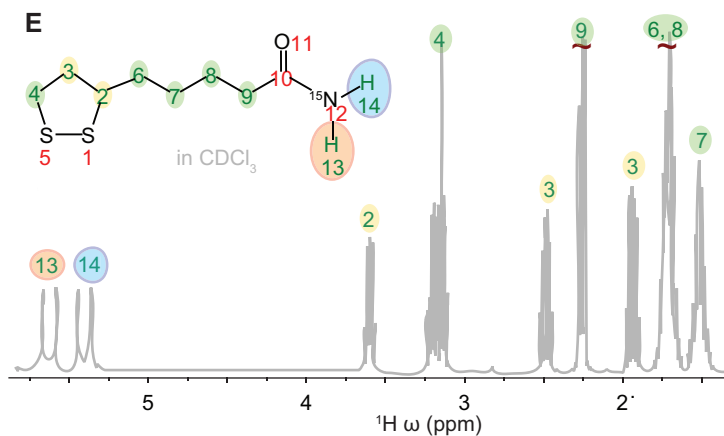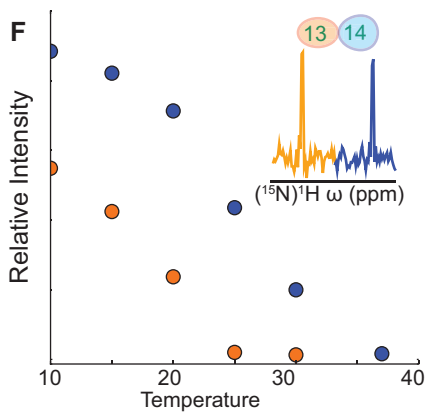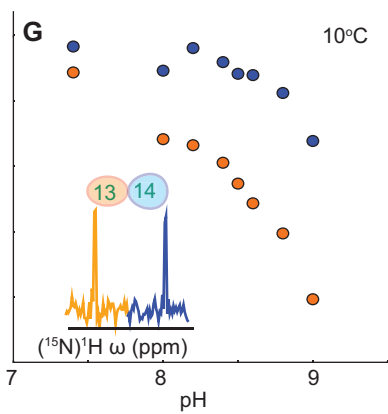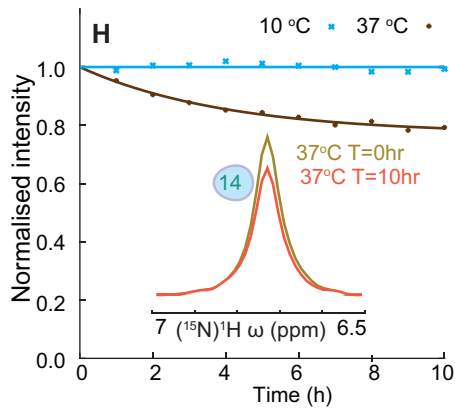

08

09 **Fig. S2. Tracking cellular uptake of [15N]-Lipoamide using NMR**

10 **A**, Methodology for quantitation of [15N]-lipoamide uptake by HeLa cells, using the trans-amide proton to measure  
11 [15N]-lipoamide concentration (see F- H). Medium with 100  $\mu$ M [15N]-lipoamide was incubated for 1 h in the absence  
12 or presence of HeLa cells. Following removal of medium, the cells were washed with medium (without arsenate) and  
13 detached using EDTA-trypsin. Solution or cell pellet/in-cell NMR was used to determine [15N]-lipoamide concentration.  
14 Example spectra for cells stressed with 3 mM arsenate and incubated with R-(+)-lipoamide are shown with the same y  
15 axis scale. **B**, Cellular uptake was determined by subtracting signal from medium incubated with cells (red) from signal  
16 from medium without cells (blue). This was carried out for all four combinations of stressed (3 mM arsenate) or  
17 unstressed cells with [15N]-(R)-(+) or ( $\pm$ )-lipoamide. For stressed cells treated with [15N]-(R)-(+) lipoamide the high  
18 signal intensity from the washed cell sample (green) is consistent with the large uptake from the medium calculated  
19 from the with (red) and without cell (blue) signal intensity. **C**, Quantitation of B showing percentage uptake and  
20 calculated intracellular concentration, assuming that lipoamide is uniformly distributed within cells (see Supplemental  
21 Methods). Uncertainty in measurement was approximately 30% and there was no significant difference in uptake  
22 between conditions. All measurements indicated substantial uptake of lipoamide and cellular concentrations  $>1$  mM.  
23 **D**, Overview of synthesis of [15N]-lipoamide, highlighting the trans amide proton (14). **E**,  $^1\text{H}$  NMR spectrum of [15N]-  
24 lipoamide in  $\text{CDCl}_3$ . Peaks can be unambiguously assigned to individual proton environments. F-H, Controls determining  
25 reliability of quantitation of [15N]-lipoamide using the amide protons in  $^{15}\text{N}$  edited  $^1\text{H}$  NMR experiments. **F**,  
26 Dependency of the cis (13) and trans (14) amide proton signal on temperature, at a constant pH of 8.3. Both resonances  
27 decreased with increasing temperature, indicating local molecular dynamics and/or interactions with  $\text{H}_2\text{O}$  on ms to  $\mu\text{s}$   
28 timescale reduce the signal. Trans amide proton resonance approaches a plateau towards  $10^\circ\text{C}$ . **G**, Dependency of the  
29 cis and trans amide proton signal on pH, at a constant temperature of  $10^\circ\text{C}$ . Together, indicating at  $10^\circ\text{C}$  and below  
30 pH 8.6 integrated signal intensity of the trans-amide proton of lipoamide in  $^{15}\text{N}$  edited  $^1\text{H}$  NMR experiments is a reliable  
31 proxy for concentration. **H**, Signal intensity of the trans-amide proton of lipoamide, when dissolved in growth medium,  
32 decreased over time at  $37^\circ\text{C}$  but not at  $10^\circ\text{C}$ . At  $10^\circ\text{C}$  signal intensity is stable for  $>10$  h experiments.

33

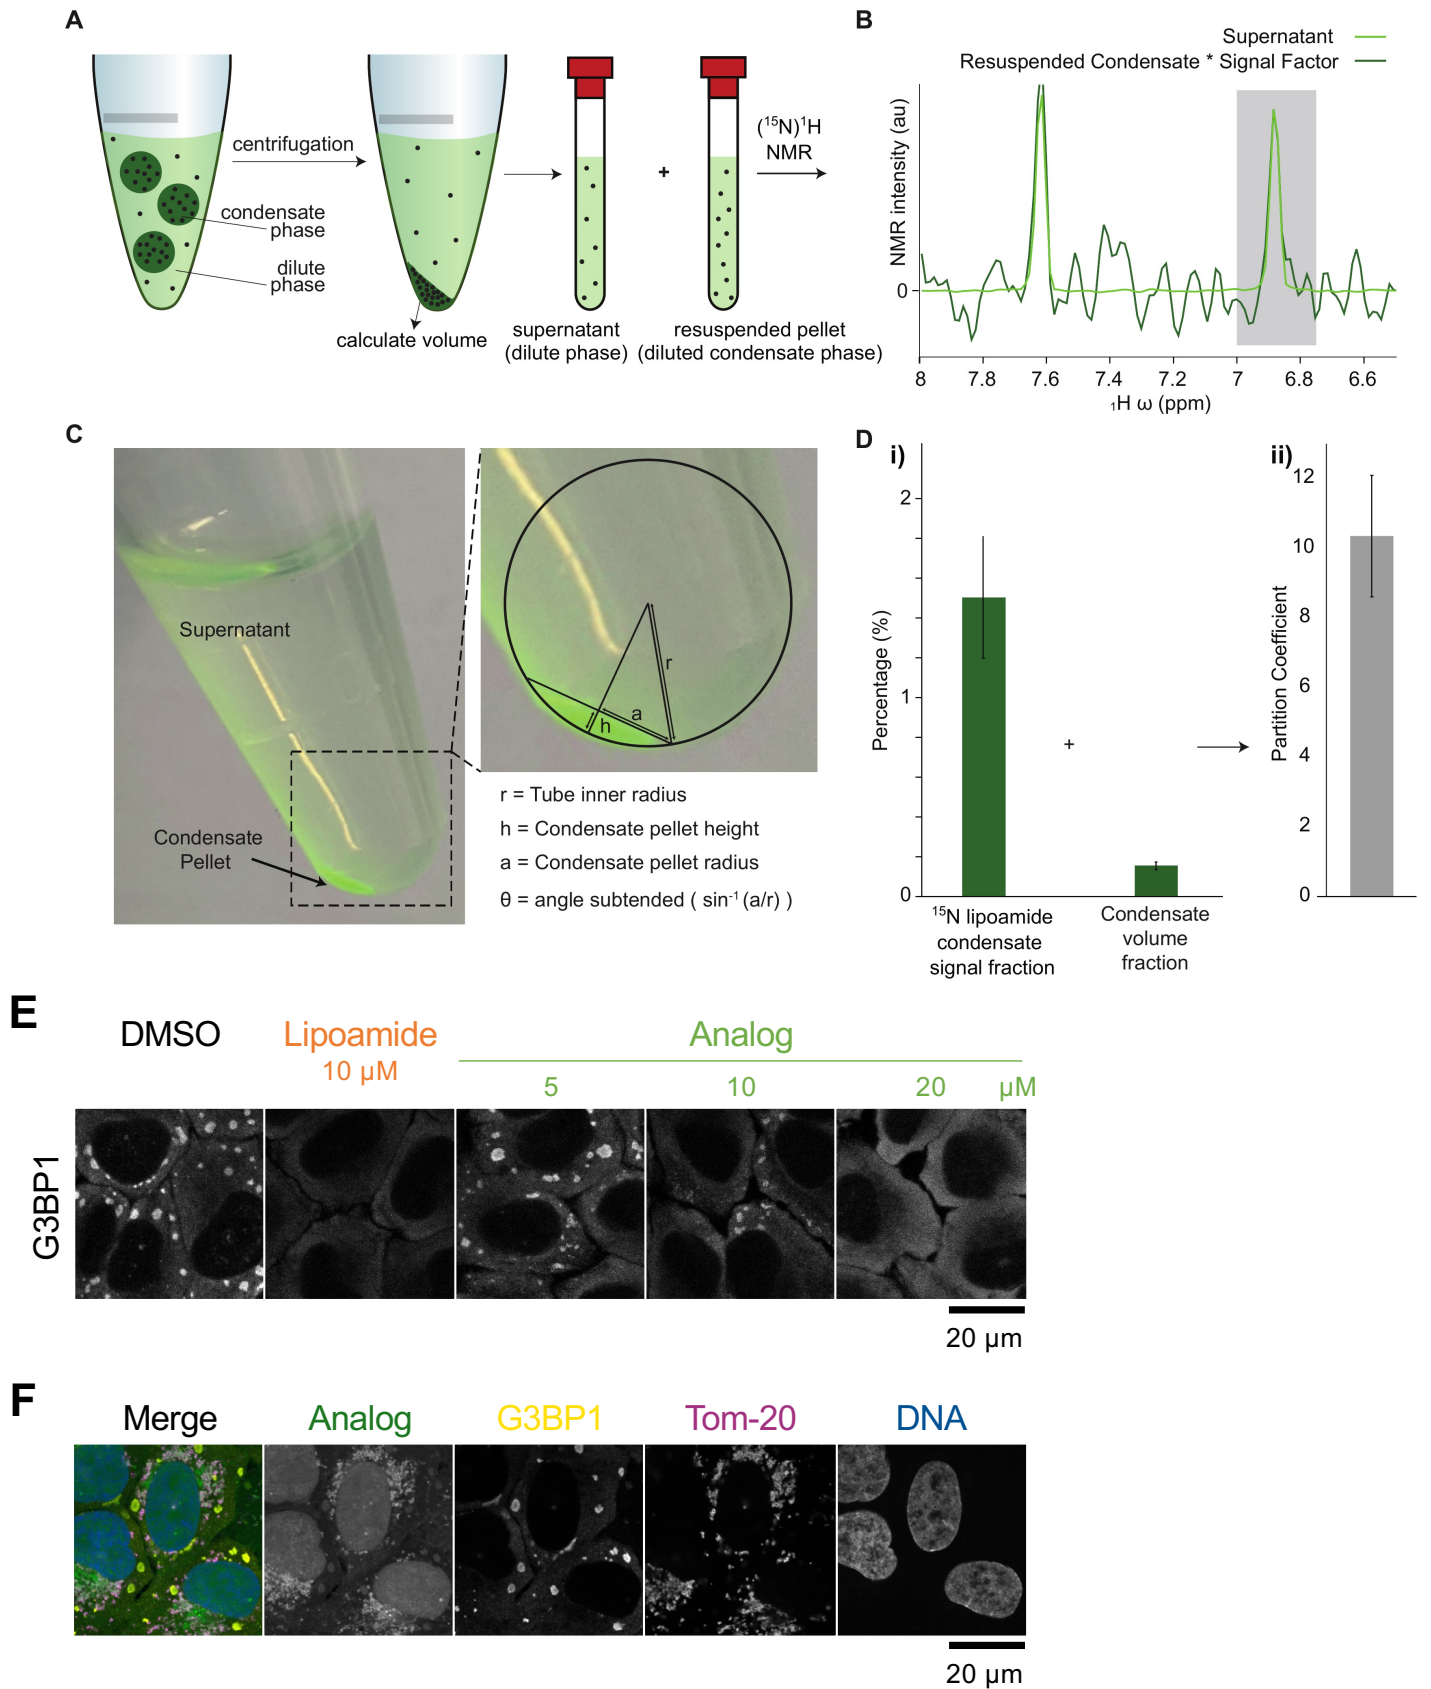



34 **Fig. S3. Experimental set up for portioning assays of lipoamide and its analogue**

35 **A-D**, Methodology for determination of partition of [<sup>15</sup>N]-lipoamide into FUS condensates *in vitro*. (A) Schematic  
36 showing the sample preparation process. (B) Example of <sup>15</sup>N edited <sup>1</sup>H NMR signal around the <sup>15</sup>N cis and trans amide  
37 protons for a dilute phase and condensate phase. Condensate phase spectrum is shown scaled by an experimentally  
38 determined signal factor, used in calculation of the signal fraction. (C) Measurements for calculation of condensate  
39 pellet volume from macro photographs of the sample within a microcentrifuge tube. (D) Mean ± s.d. of measured <sup>15</sup>N  
40 edited <sup>1</sup>H NMR signal fraction and condensate volume fraction (from 4 independent experiments) and calculated  
41 partition coefficient. Alternative presentation of the data in Fig. 2A. **E**, Representative images of HeLa cells pre-treated  
42 with indicated concentrations of lipoamide or the click-crosslink lipoamide analog in Fig. 2B for 1 h followed by 1 mM  
43 of arsenate for additional 1 h in the presence of compounds. SGs were labelled with G3BP1. **F**, The images of HeLa cells  
44 treated with the analog and subjected to arsenate treatment and UV cross-linking from Fig. 2C, with a channel of Tom-  
45 20 as a mitochondrial marker.

46

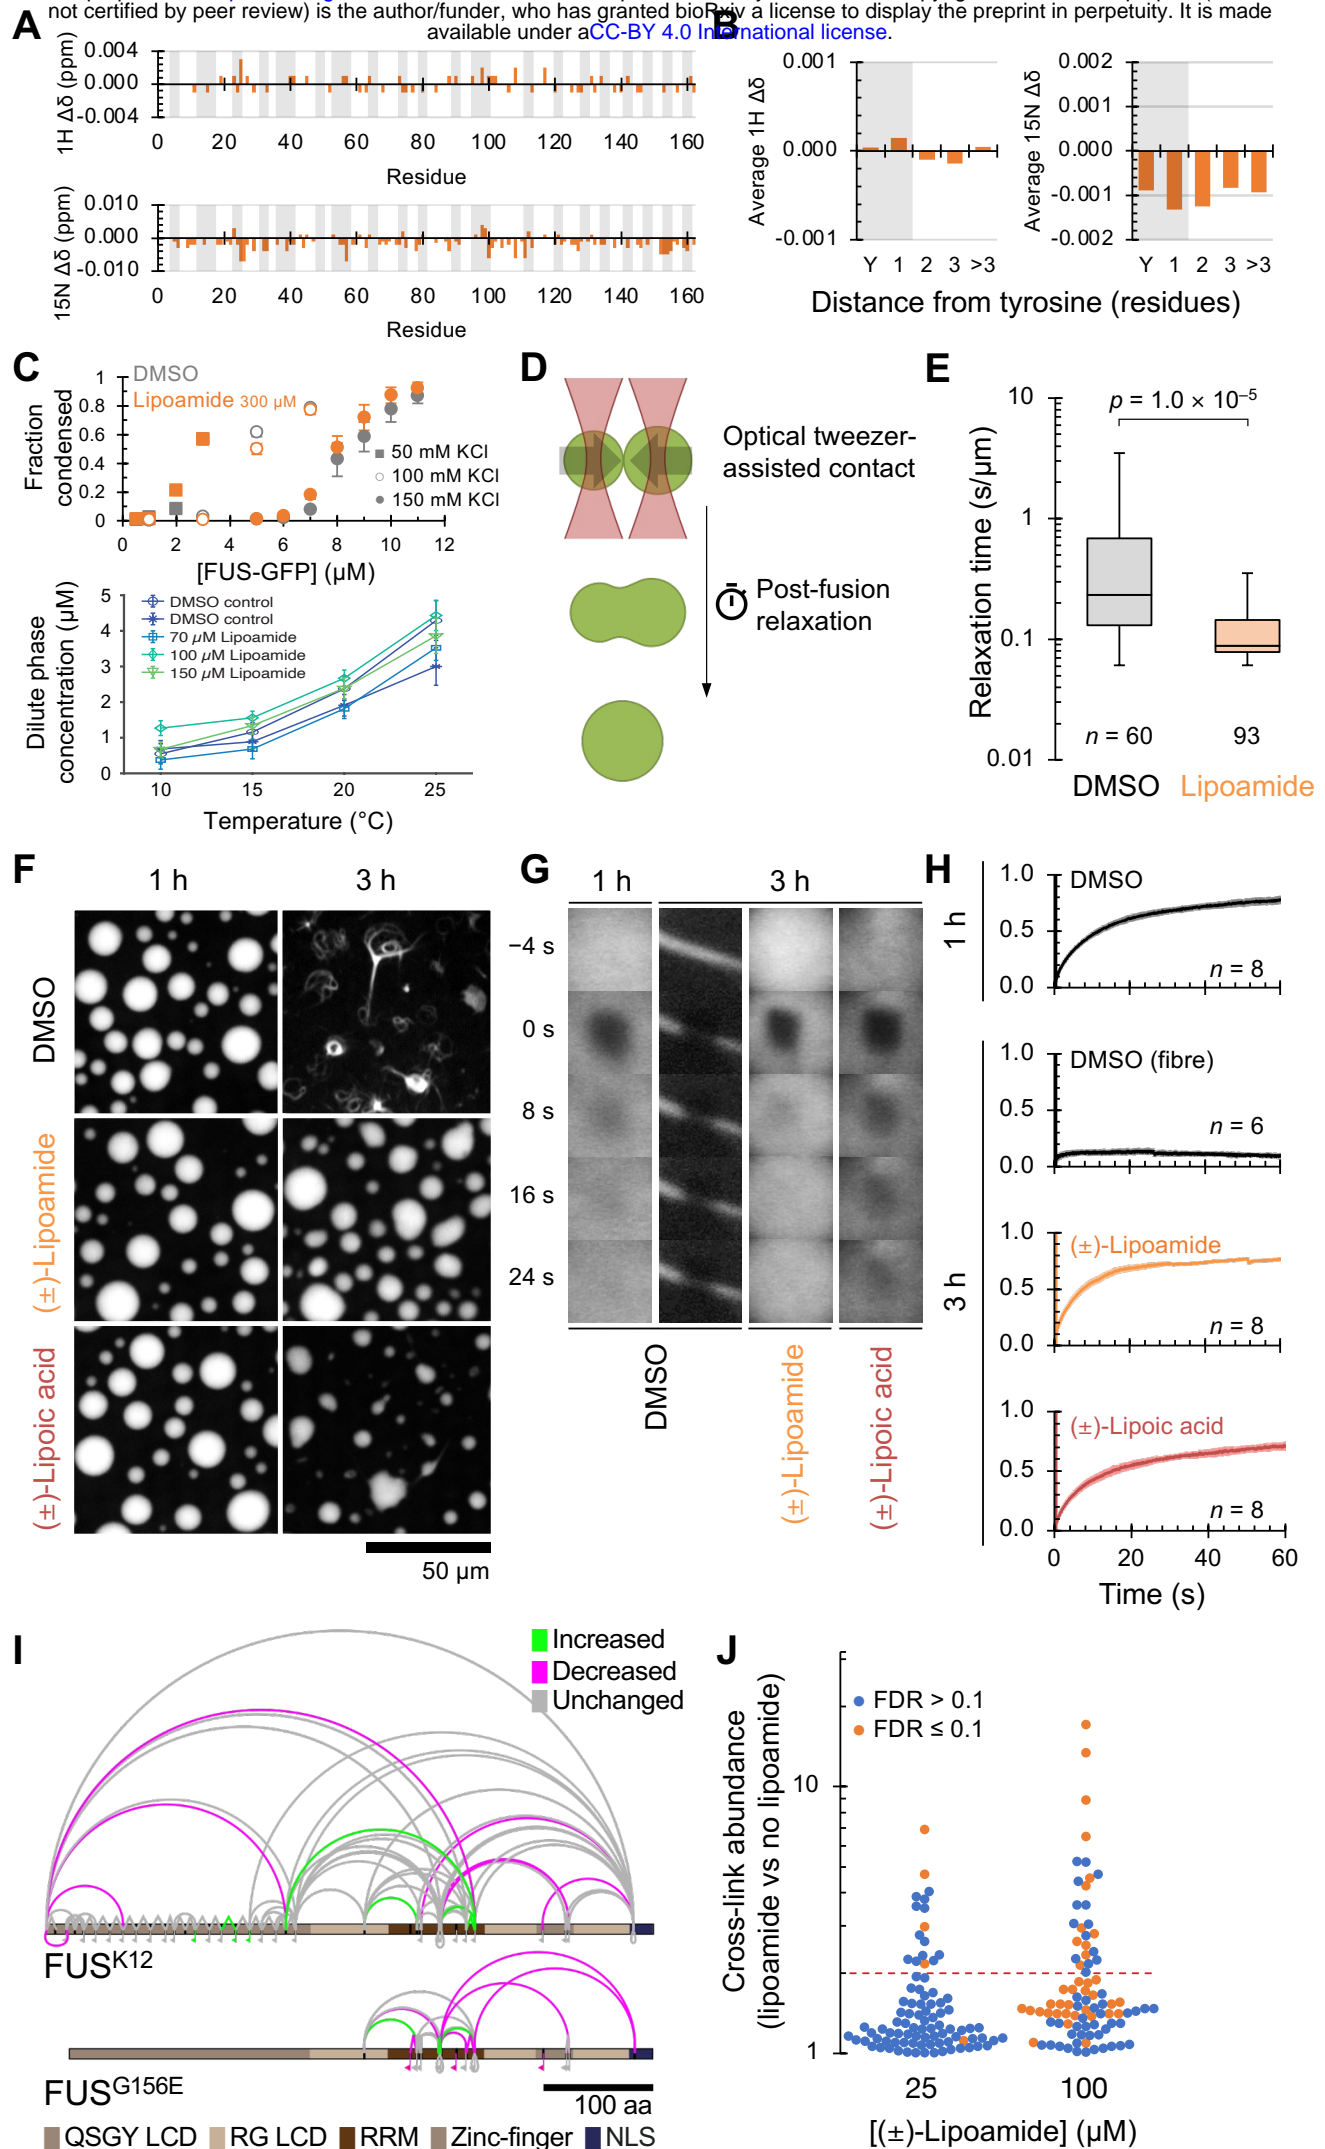

47 **Fig. S4. Lipoamide weakly increases liquidity of FUS condensates *in vitro***

48 **A**, NMR chemical shift deviations per residue for the FUS N-terminal PLD (residues 1 to 163) with 500  $\mu$ M lipoamide  
49 compared to the drug solvent control (1% DMSO). Light grey bars indicate tyrosine residues and residues neighbouring  
50 a tyrosine. **B**, Average  $^1\text{H}$  and  $^{15}\text{N}$  shifts across residues zero, one, two, three or more than three residues from a tyrosine  
51 in the presence of lipoamide. **C**, Top, mean  $\pm$  s.d. of fractions of FUS proteins condensed at indicated salt (KCl)  
52 concentrations in the presence of 300  $\mu$ M lipoamide or the DMSO control (0.3% v/v).  $n = 16$  image fields. Bottom,  
53 dilute phase concentrations (equivalent to saturation concentrations) of FUS-GFP at 150 mM KCl at different  
54 temperatures and lipoamide concentrations (errors are s.d.) **D**, Schematic illustrating the quantitation of condensate  
55 droplet liquidity using optical tweezers. Two droplets are brought into contact and begin to fuse: the time taken to  
56 relax to a single spherical droplet (once adjusted for the geometric mean radius as the characteristic droplet size) is a  
57 measure of the viscosity to surface tension ratio of the droplet – a proxy of liquidity. **E**, Droplet size-corrected relaxation  
58 times for droplet fusions with either 300  $\mu$ M lipoamide ( $n = 93$  independent fusion event) or equivalent DMSO solvent  
59 control (0.3%,  $n = 60$ ). Box represents the 25<sup>th</sup>, 50<sup>th</sup> and 75<sup>th</sup> percentiles, whiskers represent 5<sup>th</sup> and 95<sup>th</sup> percentiles.  $p$   
60 value by unpaired  $t$ -test. Lipoamide reduces fusion time, indicating lower viscosity and/or greater surface tension. **F–**  
61 **H**, Effect of 30  $\mu$ M lipoamide or lipoic acid on FUS G156E-GFP condensates ‘aging’, relative to an equivalent DMSO  
62 solvent control (0.3%). Condensates were formed under 50 mM of KCl while shaking. (F) Representative images after  
63 1 and 3 h aging, showing fibre formation in the DMSO sample in contrast to the lipoamide or lipoic acid samples. (G)  
64 Representative fluorescence recovery after photobleaching (FRAP) time series of FUS condensates and fibres at  
65 corresponding time points. (H) Mean  $\pm$  s.d. of relative intensity of FUS-GFP FRAP in (G). Aged (3 h) condensates treated  
66 with lipoamide or lipoic acid maintain large FUS-GFP mobile fraction. Both compounds delay fibre formation. **I**, Changes  
67 in intramolecular crosslinking due to lipoamide of FUS in *in vitro* low salt (80 mM KCl) condensates using the lysine-  
68 rich FUS K12 or FUS G156E. Significantly changed crosslinking sites with a change in intensity of more than two-fold  
69 and  $\text{FDR} \leq 0.1$ ; 3 independent experiments) are shown coloured in green (increased) or red (decreased). Other  
70 crosslinking sites are shown in grey. **J**, Dose-dependent effect of lipoamide on FUS K12, plotting absolute change in  
71 crosslink intensity relative to no lipoamide. Crosslinking sites with false discovery rate (FDR)  $> 0.1$  are shown in blue,  
72 those with  $\text{FDR} \leq 0.1$  in orange (2 independent experiments). Two-fold change is indicated with a dashed red line.

73

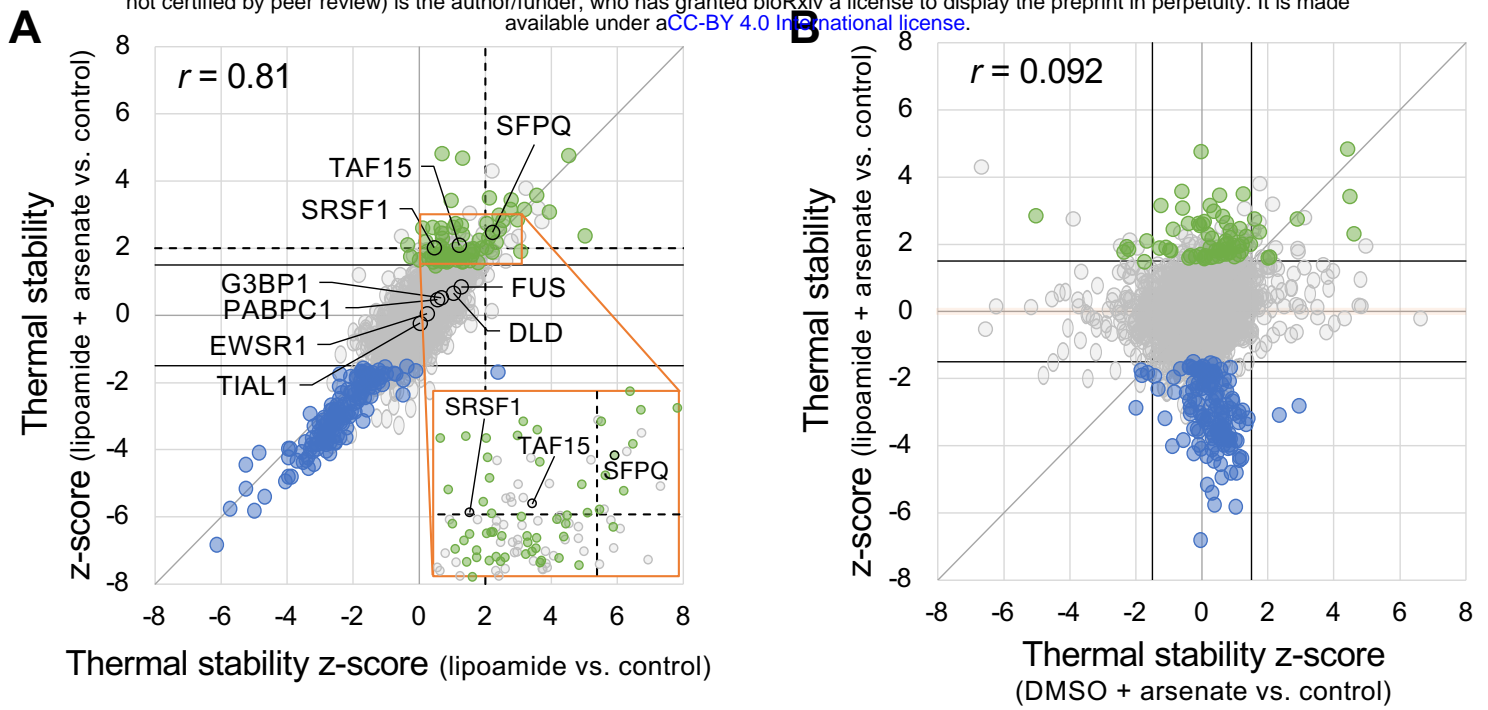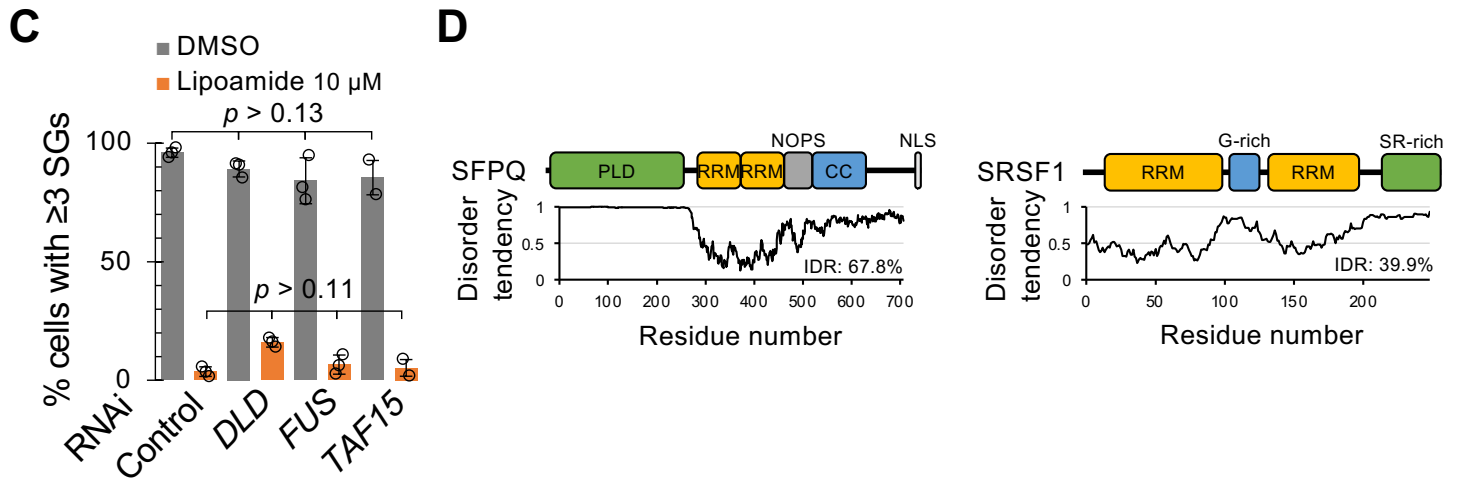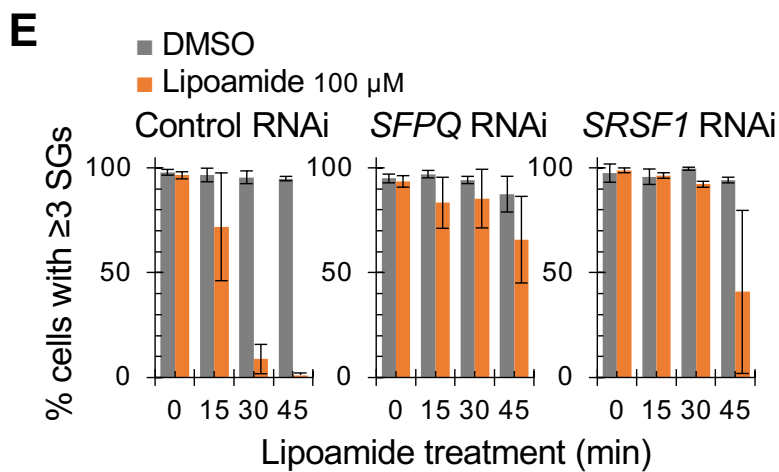

74

75 **Fig. S5. SFPQ and SRSF1 are cellular targets of lipoamide not necessary for stress granule formation**

76 **A**, Z-scores of protein thermal stability in HeLa cells treated with only lipoamide and both lipoamide and arsenate.  
77 Proteins categorized as stabilized and destabilized in Fig. 4C,D are depicted in green and blue, respectively. The  
78 positions of FUS, TAF15, DLD, SFPQ, and SRSF1 are indicated. Black solid and broken lines indicate cutoffs of z-scores  
79 used for the IDR analysis in Fig. 4C ( $\pm 1.5$ ) and the targeted RNAi screen (+2), respectively. **B**, Z-scores of protein thermal  
80 stability in HeLa cells treated with only arsenate and both lipoamide and arsenate. Black lines indicate  $|z\text{-score}| = 1.5$ .  
81 In most proteins with increased or decreased thermal stability by only arsenate treatment ( $|z\text{-score}[\text{arsenate}]| > 1.5$ ),  
82 the shifts were prevented by lipoamide pre-treatment ( $|z\text{-score}[\text{arsenate} + \text{lipoamide}]| < 1.5$ ; masked in orange).  
83 Proteins categorized in stabilized and destabilized in Fig. 4C,D are depicted in the same colours; note that shifts in their  
84 thermal stability was not primarily due to treatment with arsenate. **C**, Mean  $\pm$  s.d. of percentage of HeLa cells with  $\geq 3$   
85 G3BP1-positive stress granules. Cells depleted of indicated genes were treated with 10  $\mu\text{M}$  lipoamide or 0.1% DMSO  
86 for 1 h followed by 1 mM arsenate for 1 h in the presence of lipoamide before stained with G3BP1.  $n = 324\text{--}393$  cells  
87 from 3 independent experiments.  $p$  values by Tukey's test. **D**, Domain compositions and distributions of IDRs of human  
88 SFPQ (left) and SRSF1 (right). PLD, prion-like domain; RRM, RNA recognition motif; NOPS, NonA/paraspeckle domain;  
89 CC, coiled-coil domain; NLS, nuclear localizing signal; G-rich, glycine-enriched domain; SR-rich, serine/arginine-  
90 enriched domain. **E**, Mean  $\pm$  s.d. of percentage of cells with  $\geq 3$  stress granules. HeLa cells depleted of indicated genes  
91 were treated with 3 mM arsenate for 1 h, and then with 100  $\mu\text{M}$  lipoamide or the control DMSO in the presence of  
92 arsenate for indicated minutes.  $n = 213\text{--}467$  cells from 3 independent experiments. **F**, Representative images of HeLa  
93 cells treated and labeled as in Fig. 4E but without arsenate.

**A**

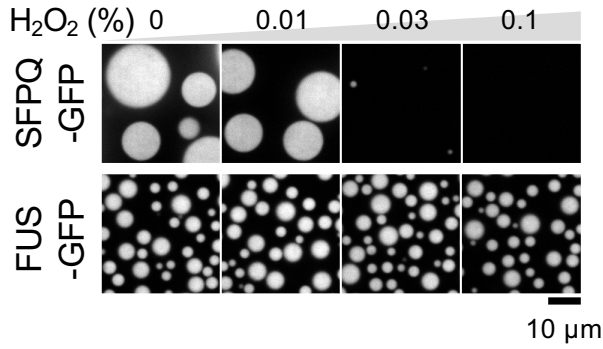

**B**

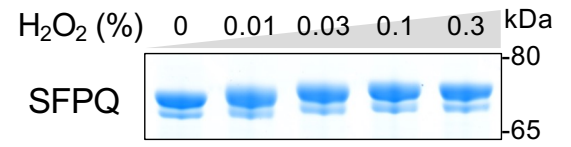

**C**

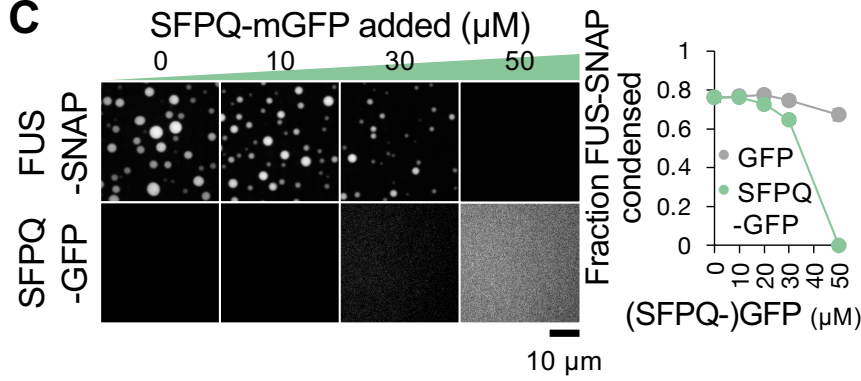

**D**

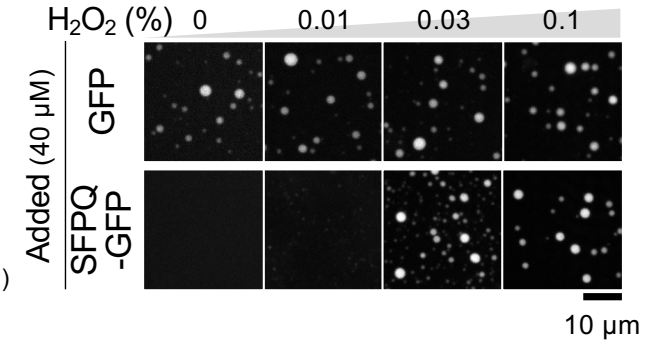

**E**

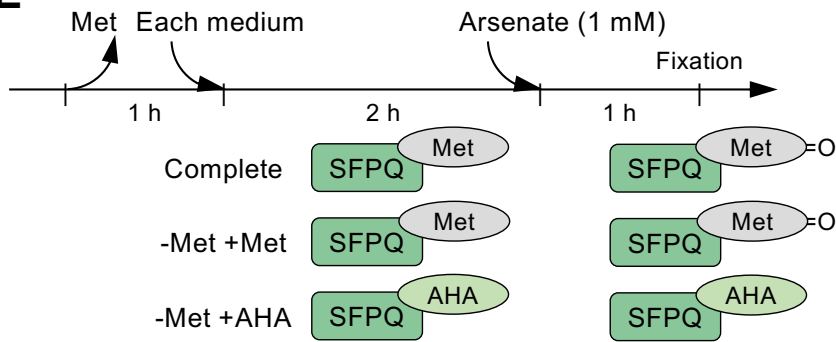

94 **Fig. S6. SFPQ dissolves FUS condensates *in vitro***

95 **A**, Representative images of SFPQ-GFP (top, 10  $\mu$ M) and FUS-GFP (bottom, 7  $\mu$ M) protein condensates at a low salt  
96 condition (75 mM KCl) and in the presence of H<sub>2</sub>O<sub>2</sub> from >3 independent experiments. **B**, SDS-PAGE (non-reduced  
97 condition) of 10  $\mu$ M of the purified and untagged SFPQ proteins in diluted state oxidized with the indicated percentages  
98 of H<sub>2</sub>O<sub>2</sub> for 30 min. **C**, Left, representative images of co-incubation of indicated concentrations of SFPQ-GFP and 6  $\mu$ M  
99 of FUS-SNAP at a physiological salt concentration (150 mM KCl) from >3 independent experiments. SFPQ proteins do  
100 not form condensates at 150 mM KCl while they suppress condensation of FUS proteins in dosage-dependent manner.  
101 Right, mean  $\pm$  s.d. of FUS condensate fraction in the presence of GFP (control) or SFPQ-GFP.  $n = 16$  image fields. **D**,  
102 Representative images of FUS-SNAP condensates (4  $\mu$ M) co-incubated with 40  $\mu$ M of GFP or SFPQ-GFP at a  
103 physiological salt concentration (150 mM KCl) in the presence of indicated percentages of H<sub>2</sub>O<sub>2</sub> from 3 independent  
104 experiments. **E**, Schema of the time course used in Fig. 5C. Cells were firstly cultured in methionine (Met)-free medium  
105 and then in each medium (complete medium or Met-free medium supplemented with Met or AHA) before arsenate  
106 treatment.

107

## A HeLa cells

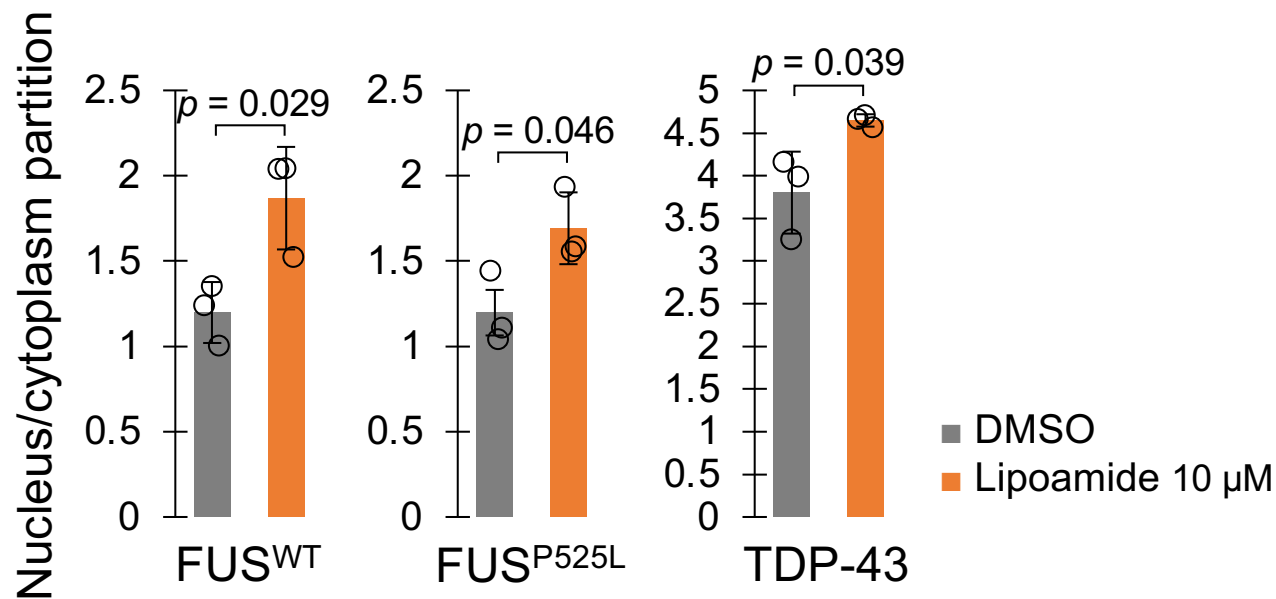

## B iPSC-derived FUS<sup>P525L</sup>-GFP MNs

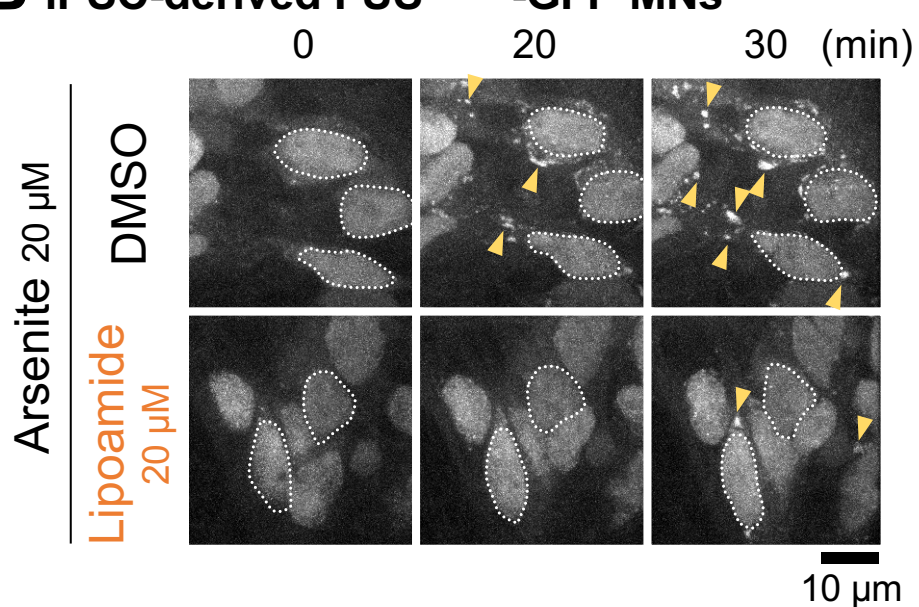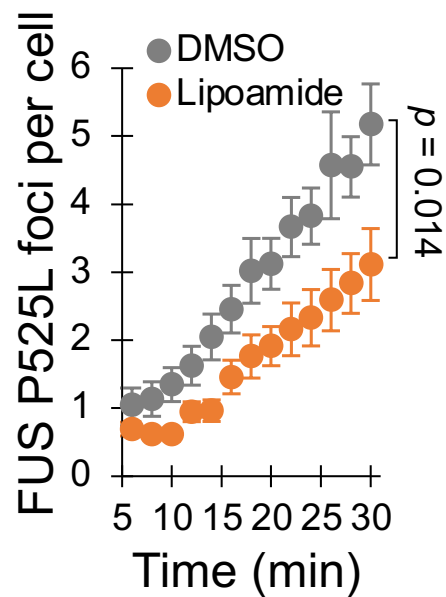

## C iPSC-derived FUS<sup>P525L</sup>-GFP MNs

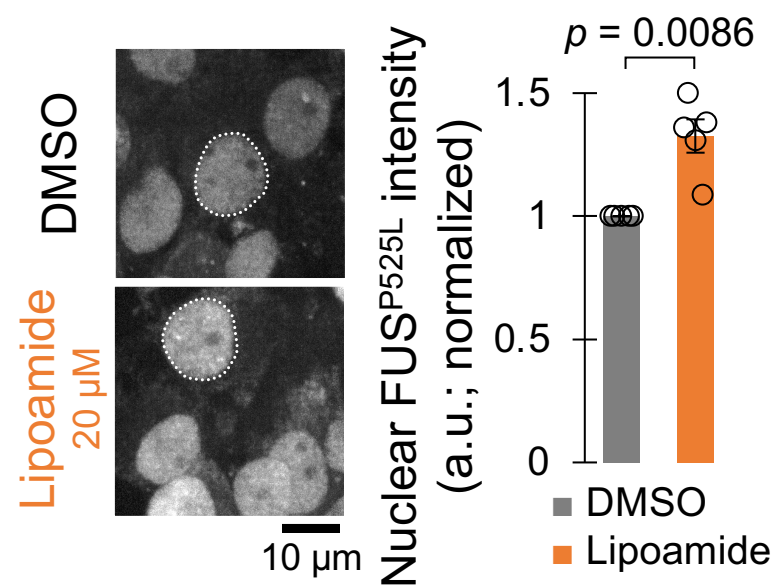



08

09 **Fig. S7. Lipoamide rescues nuclear localisation and functioning of ALS-linked proteins**

10 **A**, Mean  $\pm$  s.d. of nuclear-cytoplasmic intensity ratio of FUS and TDP-43 in HeLa cells pre-treated with 10  $\mu$ M lipoamide  
11 (0.1% DMSO as the control) for 1 h followed by 1 mM arsenate for 1 h in the presence of lipoamide.  $n = 290$ – $603$  cells  
12 from 3 independent experiments.  $p$  value by unpaired  $t$ -test. **B**, (Left) time-lapse images of iPSC-derived MNs  
13 expressing FUS P525L-GFP cultured for 14 days. Cells were treated with 0.02% DMSO or 20  $\mu$ M lipoamide for 1 h  
14 followed by 20  $\mu$ M arsenite for indicated minutes in the presence of lipoamide. Broken lines indicate outline of some  
15 nuclei. Arrowheads indicate some cytoplasmic FUS P525L foci. (Right) mean  $\pm$  s.e.m. of number of FUS P525L foci per  
16 MN after arsenite treatment.  $n = 16$  (DMSO) and 18 (lipoamide) cells from 3 independent experiments.  $p$  value by  
17 unpaired  $t$ -test. **C**, (Left) representative images of iPSC-derived MNs expressing FUS P525L-GFP cultured for 5 days and  
18 then 30 days in the presence of 0.02% DMSO or 20  $\mu$ M lipoamide. Broken lines indicate outline of some nuclei. (Right)  
19 mean  $\pm$  s.e.m. of nuclear intensity of FUS P525L-GFP, normalized to that in the control (DMSO).  $n = 64$ – $198$  cells from  
20 5 independent experiments.  $p$  value by one-sample  $t$ -test.

**A** *C. elegans* pharynx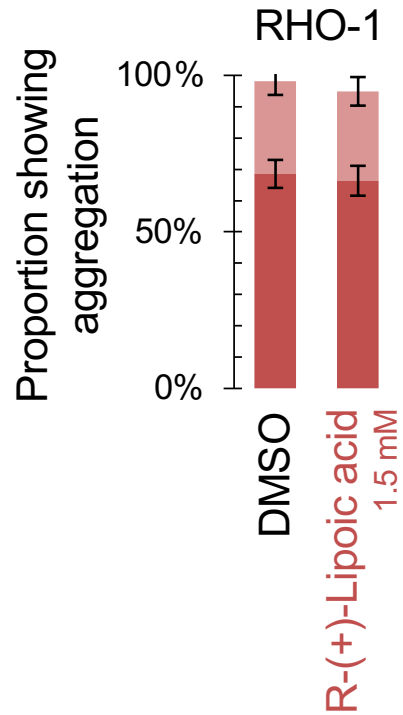**B** *D. melanogaster* locomotion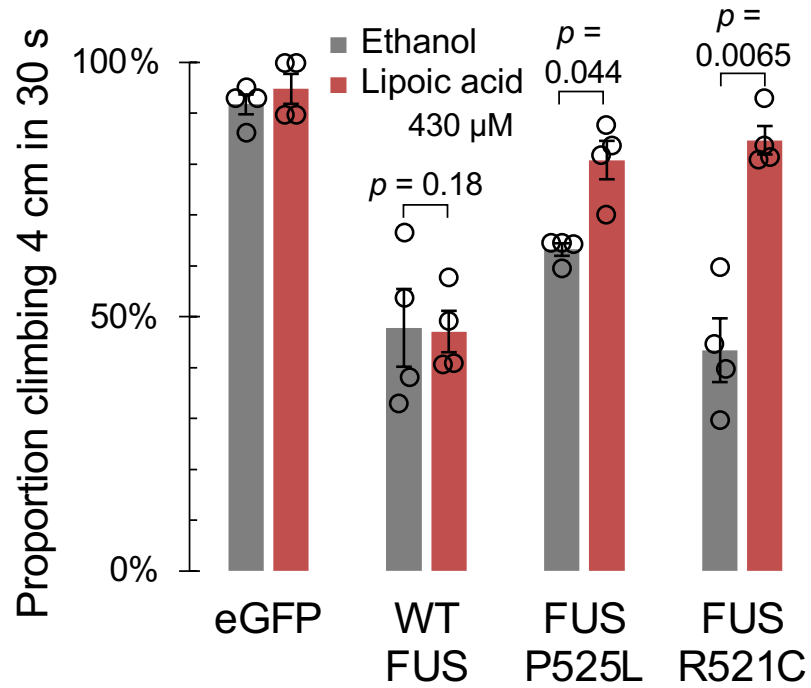**C** *D. melanogaster* neuromuscular junctions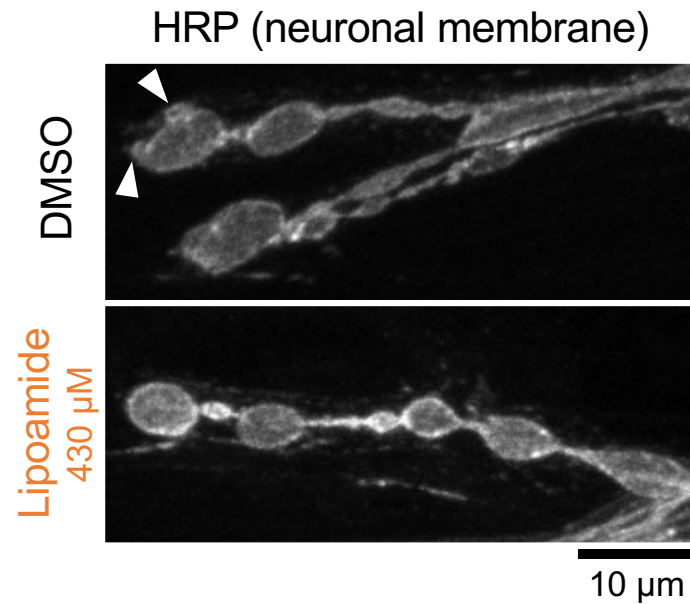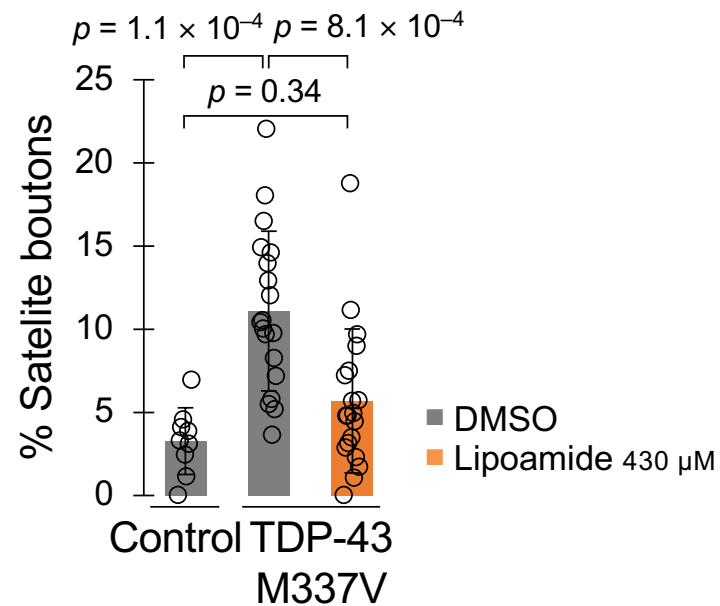

21

22 **Fig. S8. Extended analysis of *C. elegans* and *D. melanogaster* animal models of ALS**

23 **A**, Mean  $\pm$  s.e.m. of incidence of each protein aggregation in the pharyngeal muscles. Incidence of RHO-1 was scored  
24 on a low, medium, high scale (see methods). **B**, Mean  $\pm$  s.e.m. of percentage of flies that climbed, with lipoic acid  
25 feeding in place of lipoamide in Fig. 6F. *p* values by unpaired *t*-test. **C**, (Left) Representative images of synaptic boutons  
26 of TDP-43 M337V-expressing flies, immunostained with an antibody against horseradish peroxidase (HRP), which  
27 labels the neuronal membrane. Arrowheads indicate appearance of satellite boutons. (Right) mean  $\pm$  s.d. of  
28 percentage of satellite boutons (number of satellite boutons/number of total boutons) per fly. The control flies fed  
29 with 0.1% DMSO (grey; *n* = 9) and TDP-43 M337V-expressing flies fed with 0.1% DMSO (*n* = 19) or that containing  
30 430  $\mu$ M lipoamide (orange; *n* = 19) were examined. *p* value by Tukey's test.

31
